# Supplementary material for: Conformationally restricted functionalized heteroaromatics: a direct access to novel indoloindoles via Pd-mediated reaction
Source: Royal Society of Chemistry journal article supplement (doi:10.1039/c2cc38342j), 2013-01-01
Supplement: c2cc38342j_2.pdf [file c2cc38342j_2.pdf]

## Copies of $^1\text{H}$ and $^{13}\text{C}$ NMR

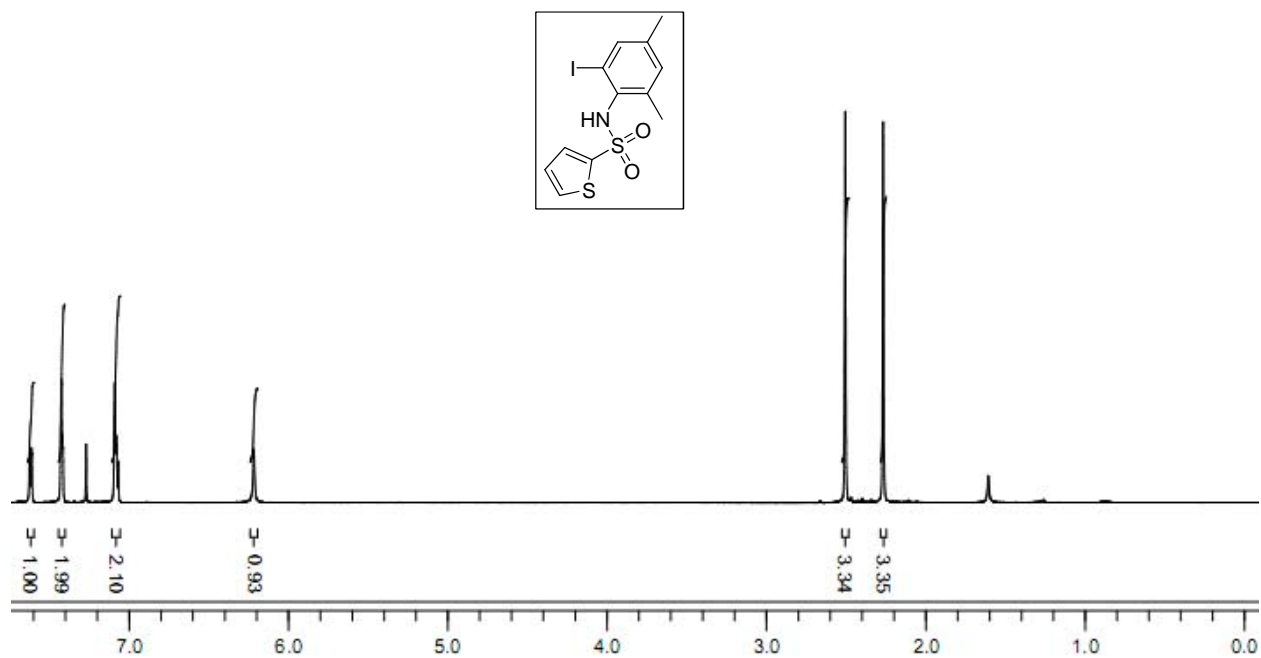

**11**  $^1\text{H}$  NMR (400 MHz,  $\text{CDCl}_3$ )

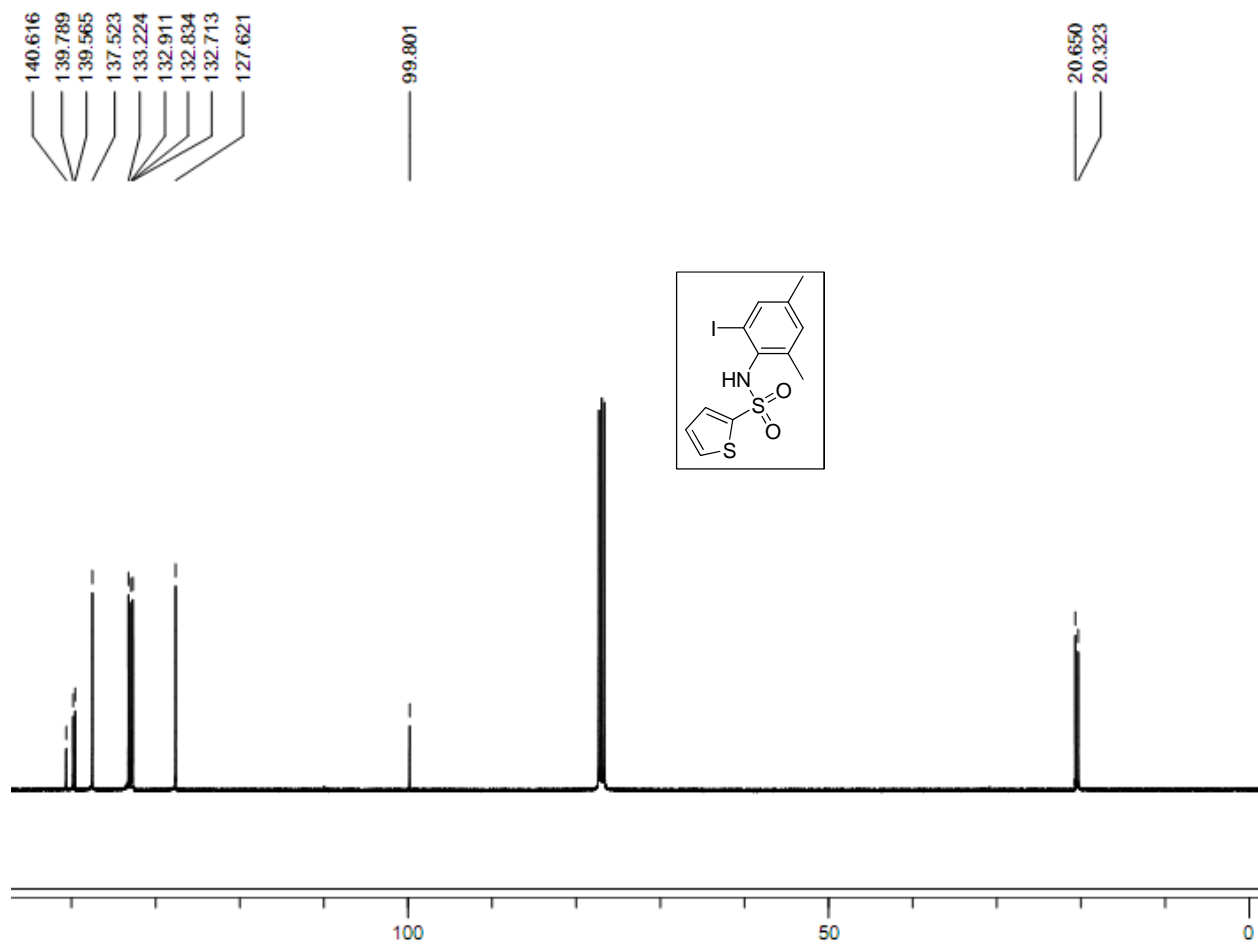

**11**  $^{13}\text{C}$  NMR (100 MHz,  $\text{CDCl}_3$ )

### Copies of $^1\text{H}$ and $^{13}\text{C}$ NMR

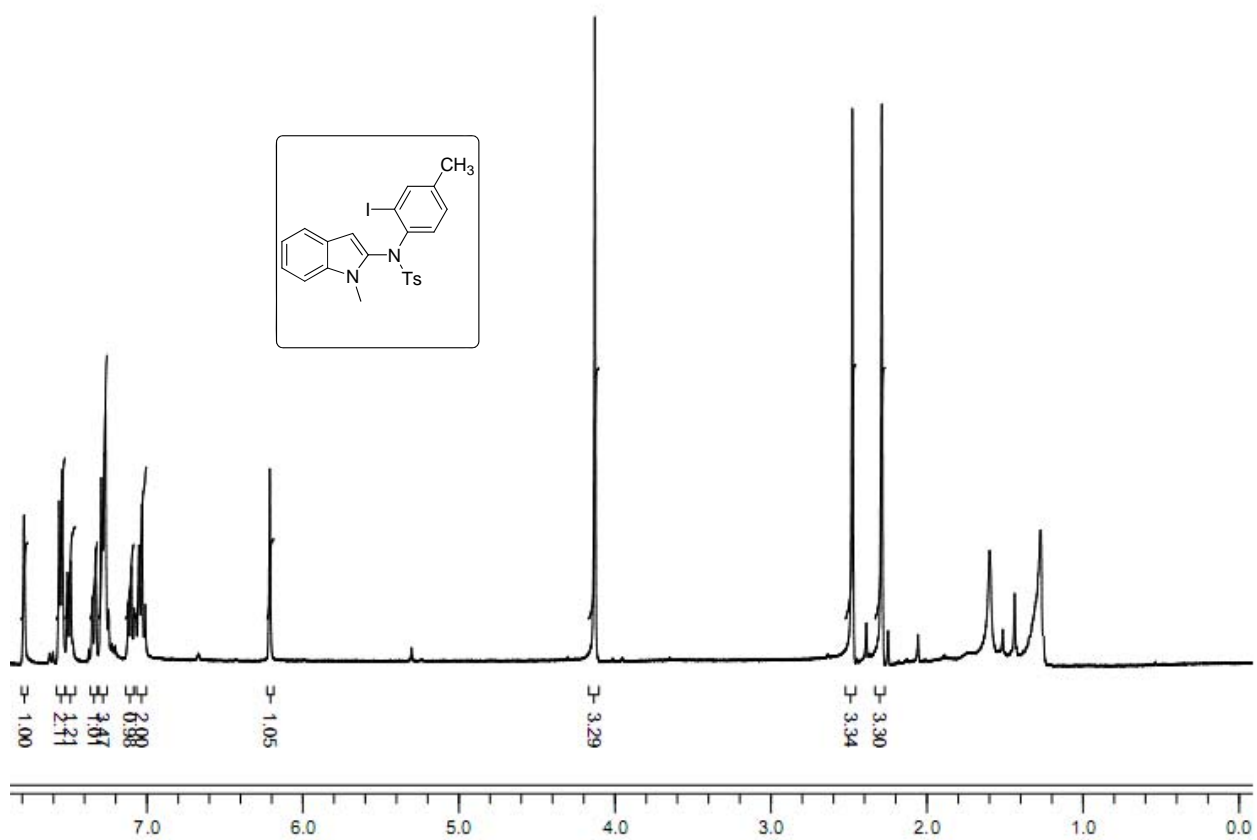

**3a**  $^1\text{H}$  NMR (400 MHz,  $\text{CDCl}_3$ )

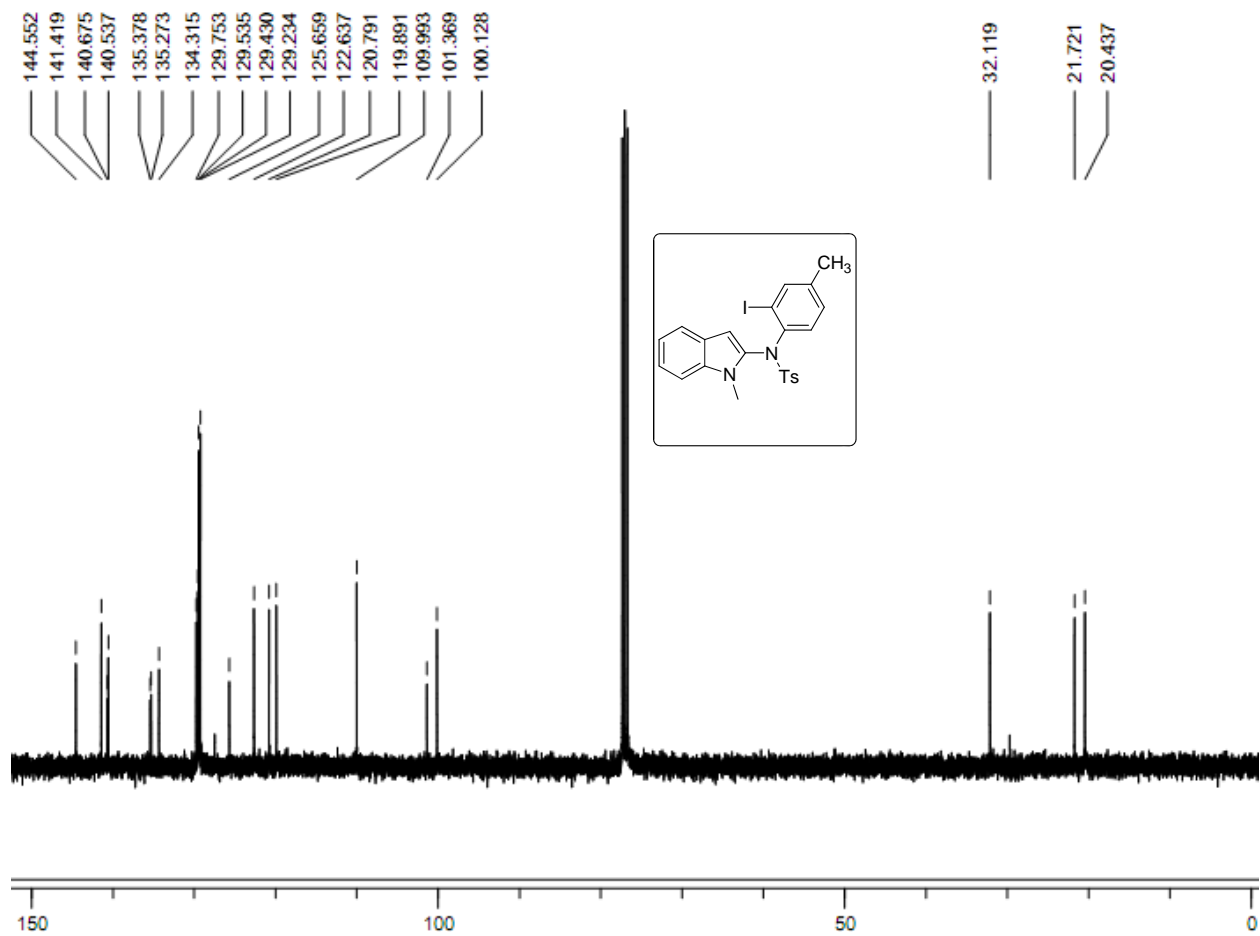

**3a** <sup>13</sup>C NMR (100 MHz, CDCl<sub>3</sub>)

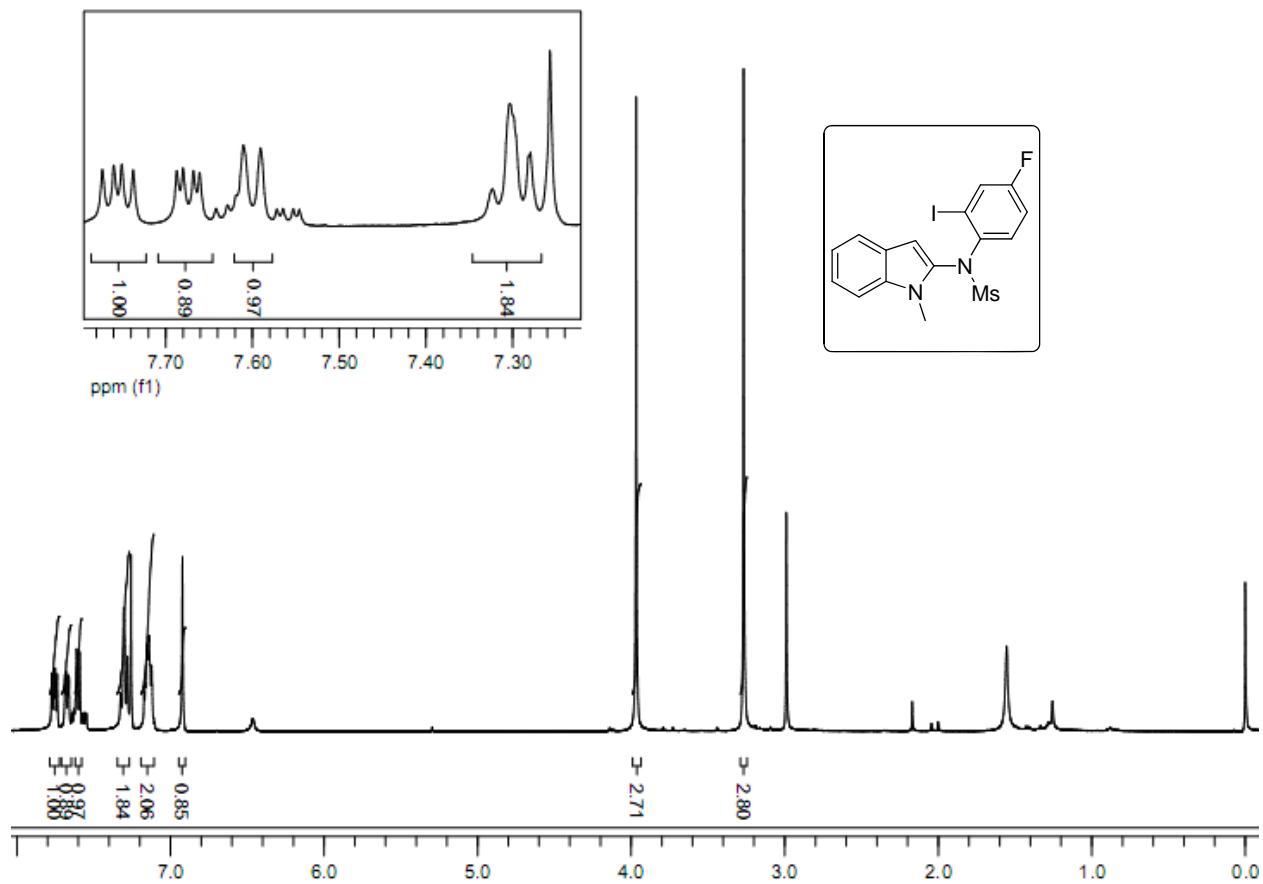

**3b**  $^1\text{H}$  NMR (400 MHz,  $\text{CDCl}_3$ )

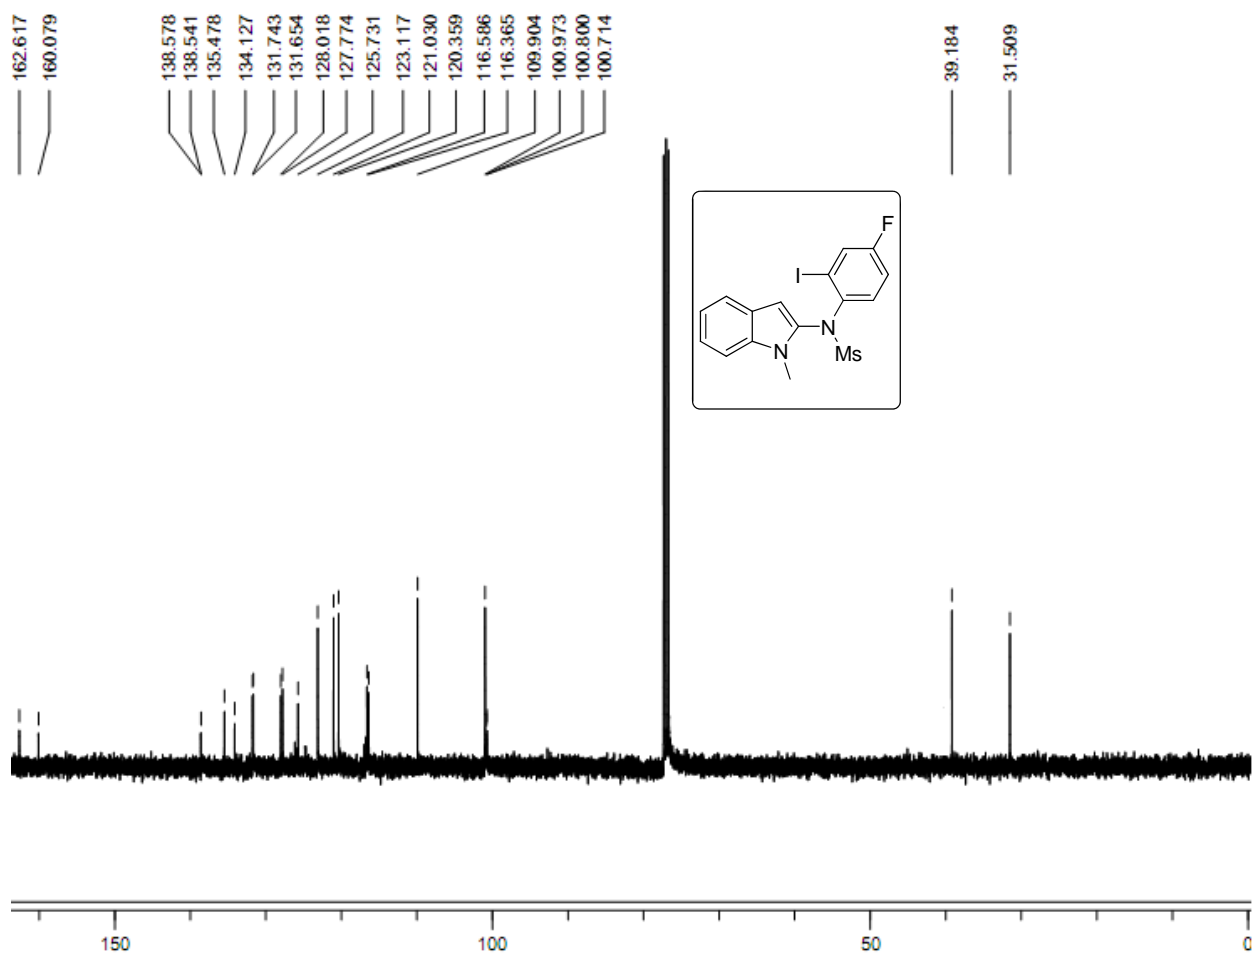

**3b**  $^{13}\text{C}$  NMR (100 MHz,  $\text{CDCl}_3$ )

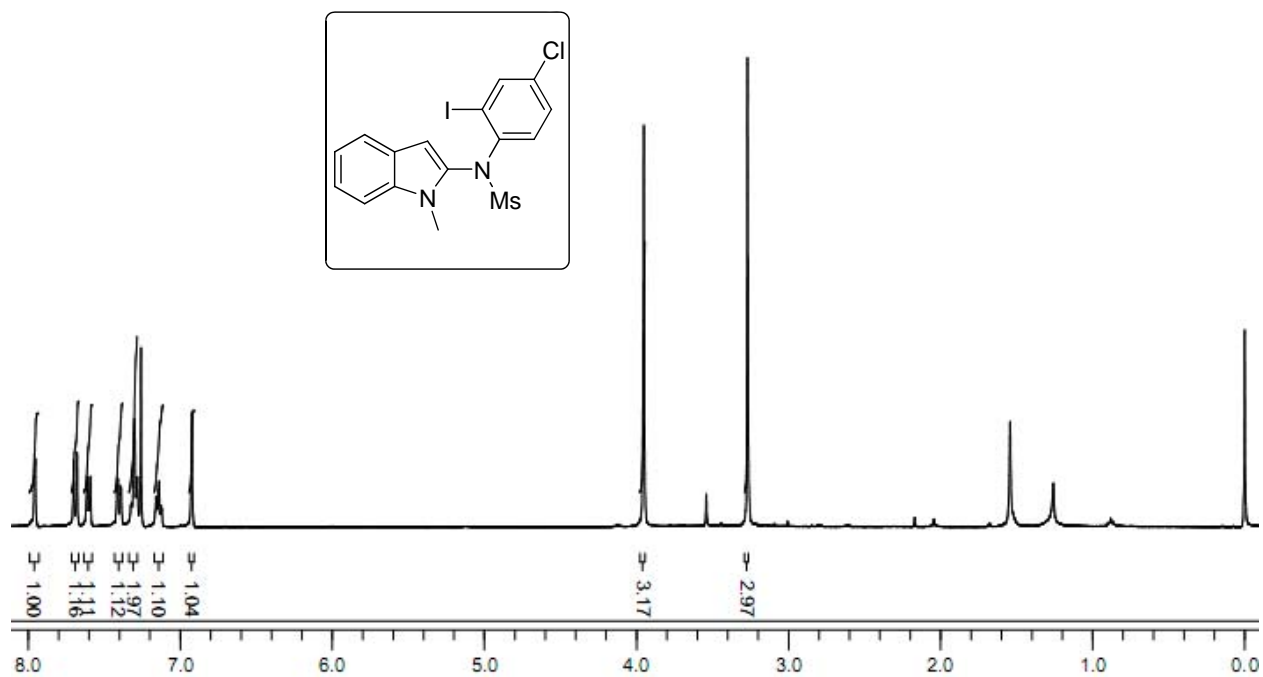

**3c**  $^1\text{H}$  NMR (400 MHz,  $\text{CDCl}_3$ )

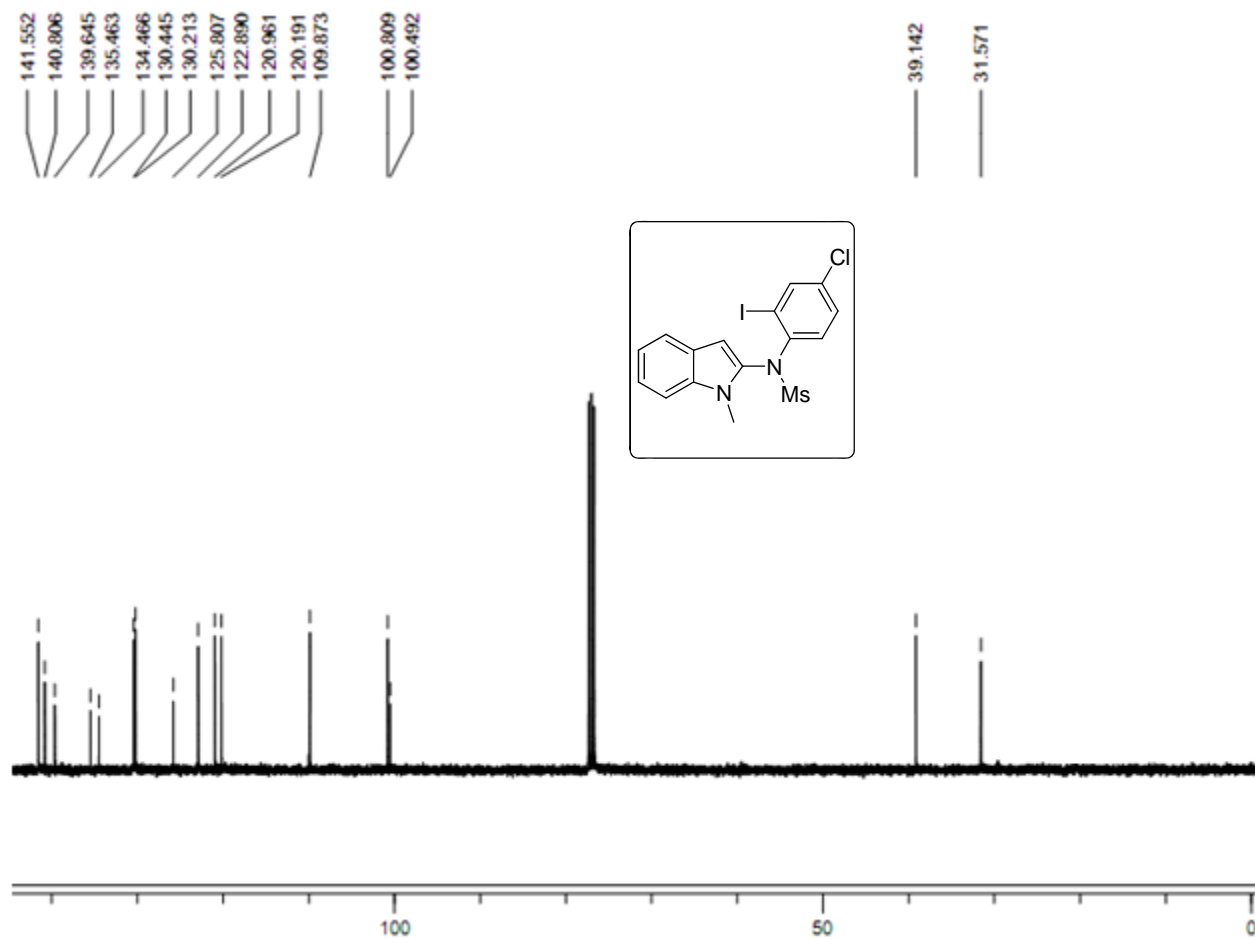

**3c**  $^{13}\text{C}$  NMR (100 MHz,  $\text{CDCl}_3$ )



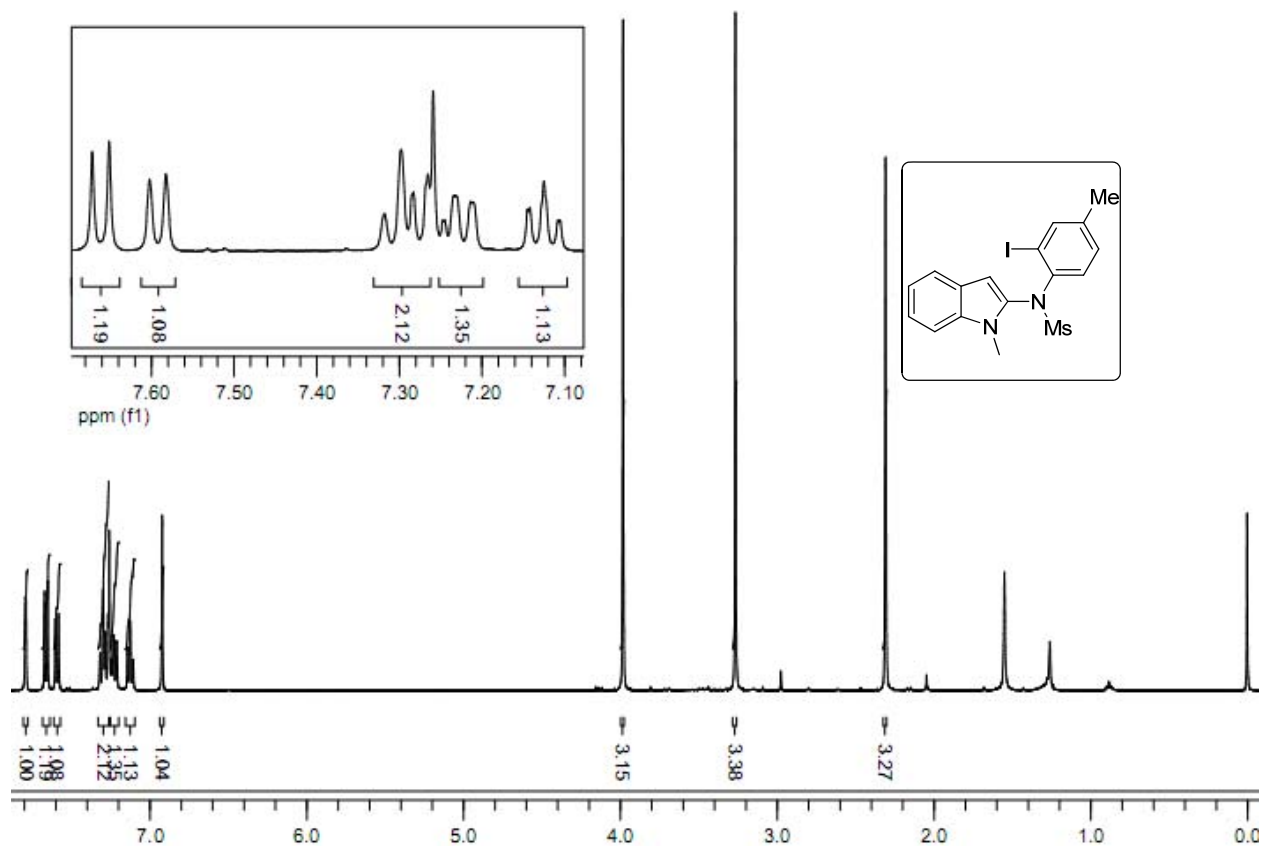

**3d**  $^1\text{H}$  NMR (400 MHz,  $\text{CDCl}_3$ )

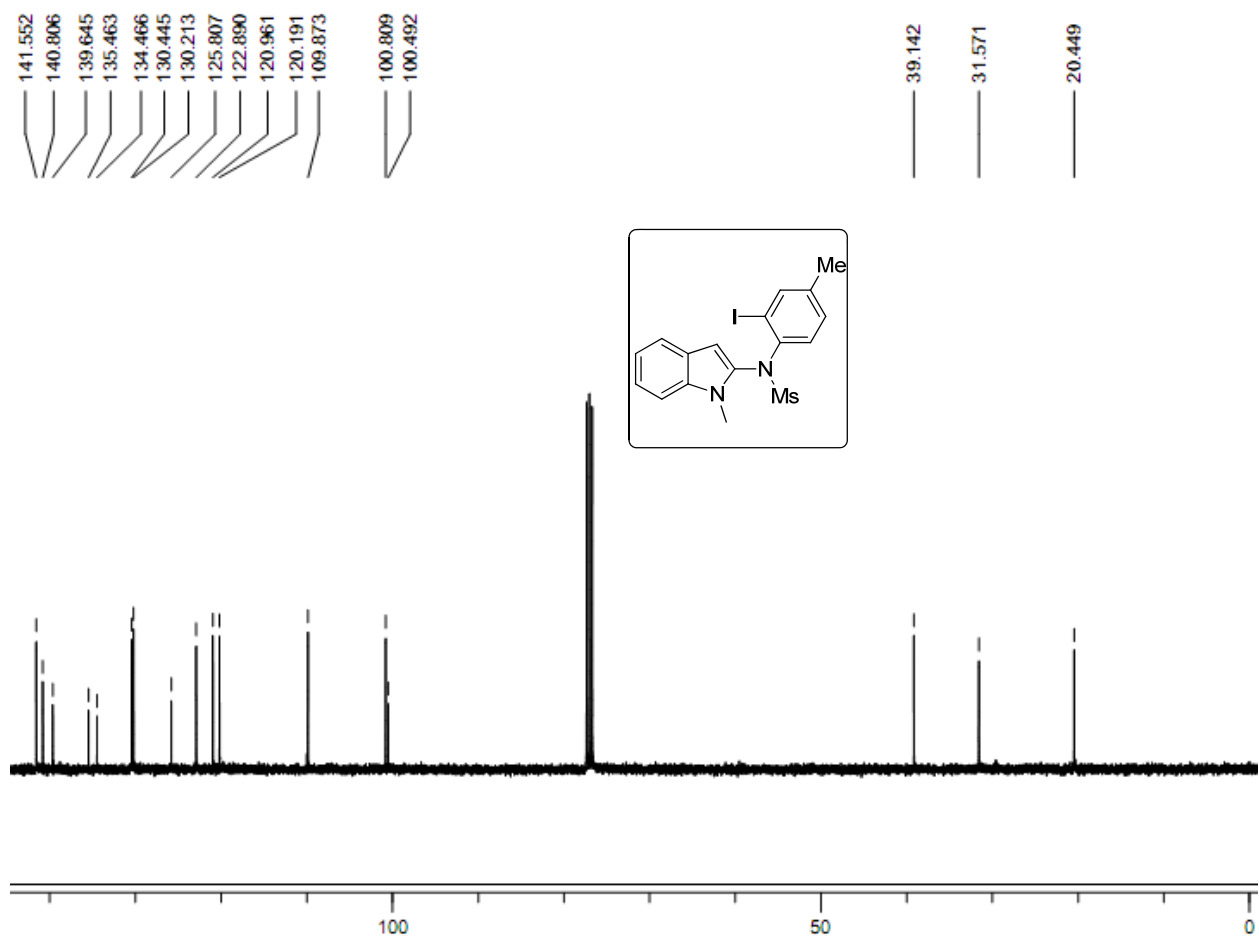

**3d**  $^{13}\text{C}$  NMR (100 MHz,  $\text{CDCl}_3$ )

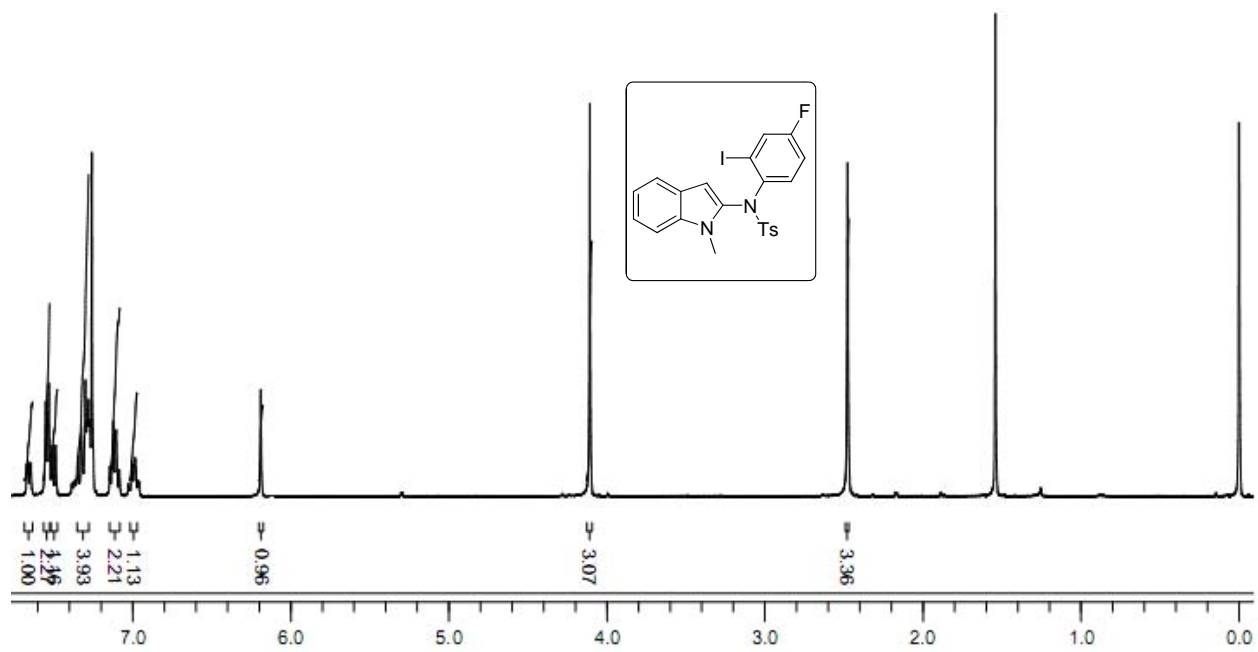

**3e**  $^1\text{H}$  NMR (400 MHz,  $\text{CDCl}_3$ )

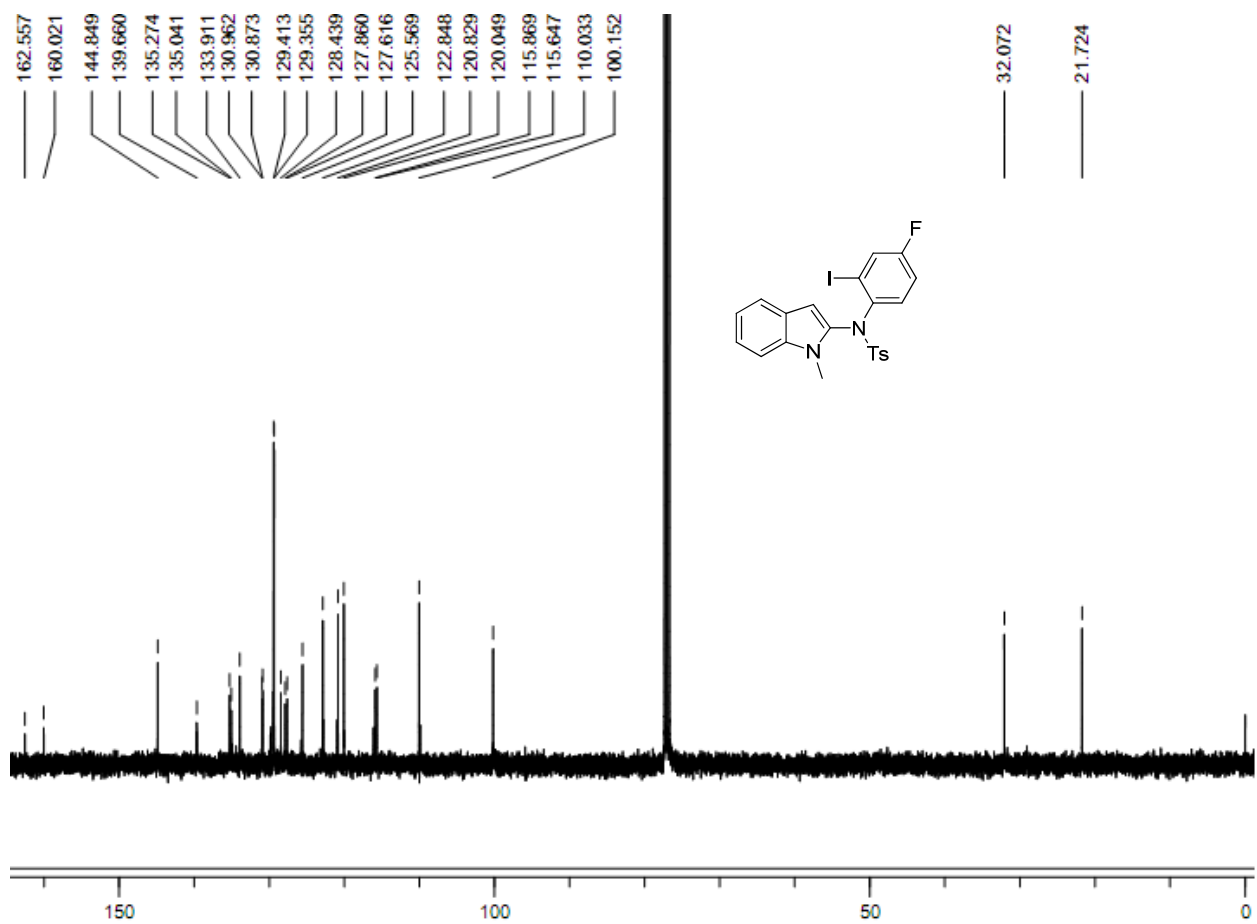

**3e**  $^{13}\text{C}$  NMR (100 MHz,  $\text{CDCl}_3$ )

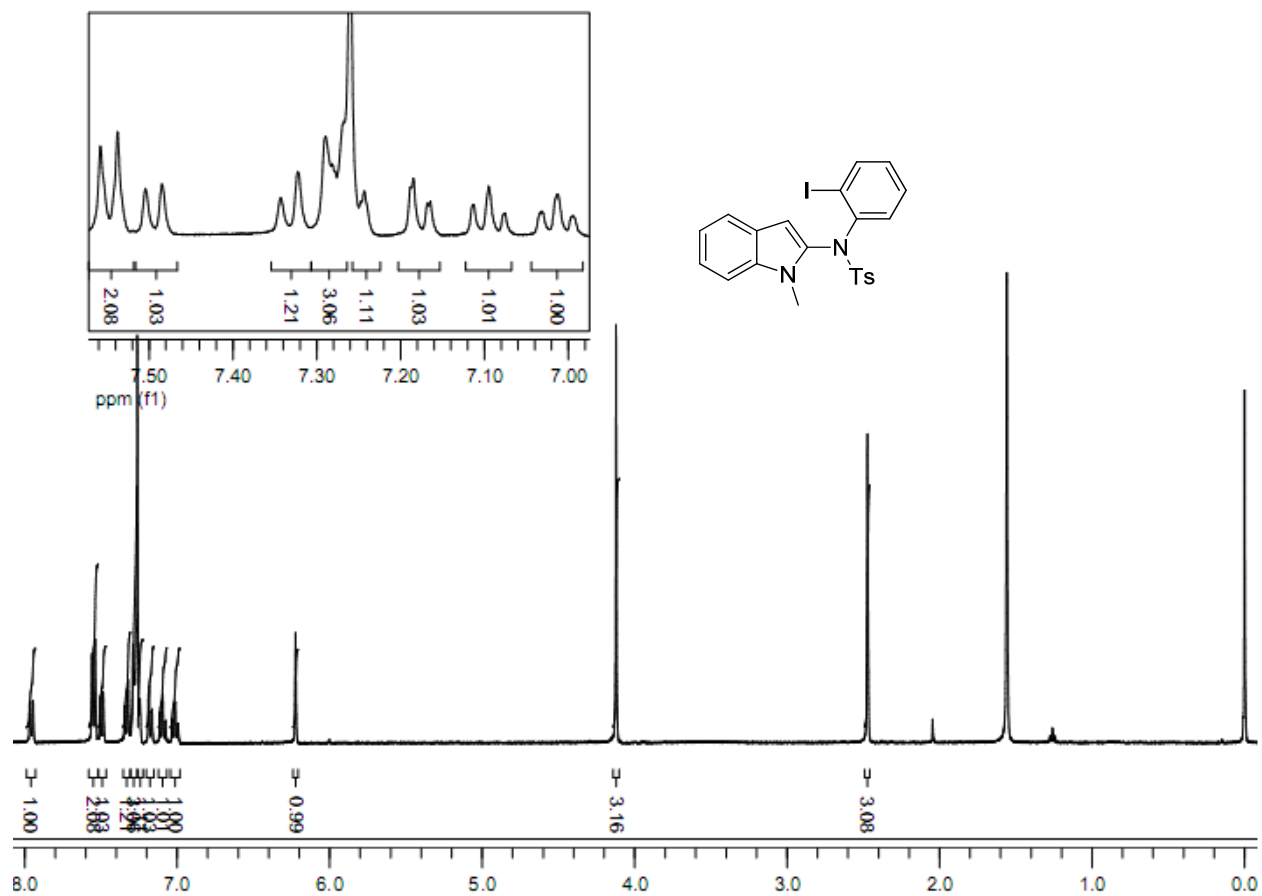

**3f**  $^1\text{H}$  NMR (400 MHz,  $\text{CDCl}_3$ )

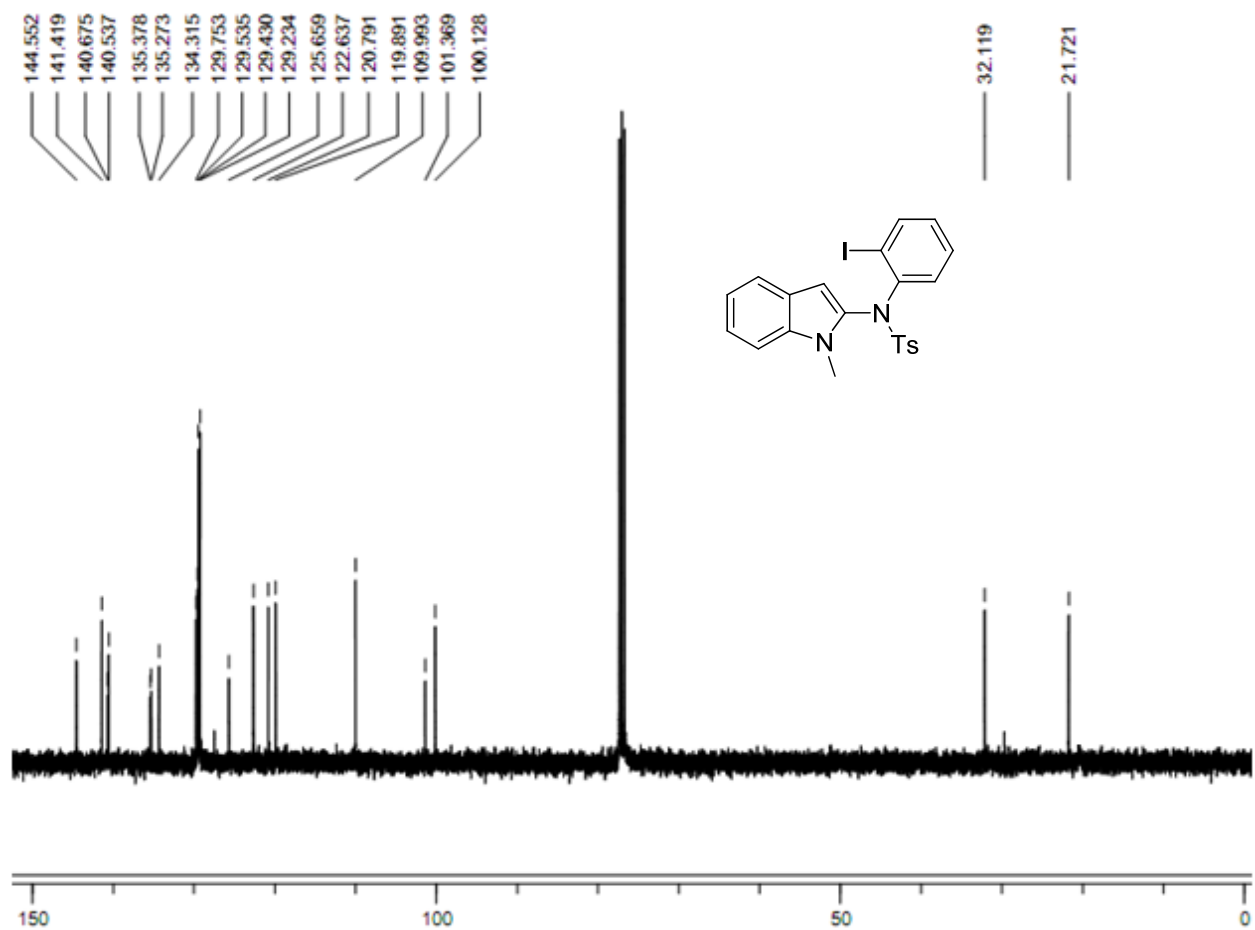

**3f**  $^{13}\text{C}$  NMR (100 MHz,  $\text{CDCl}_3$ )

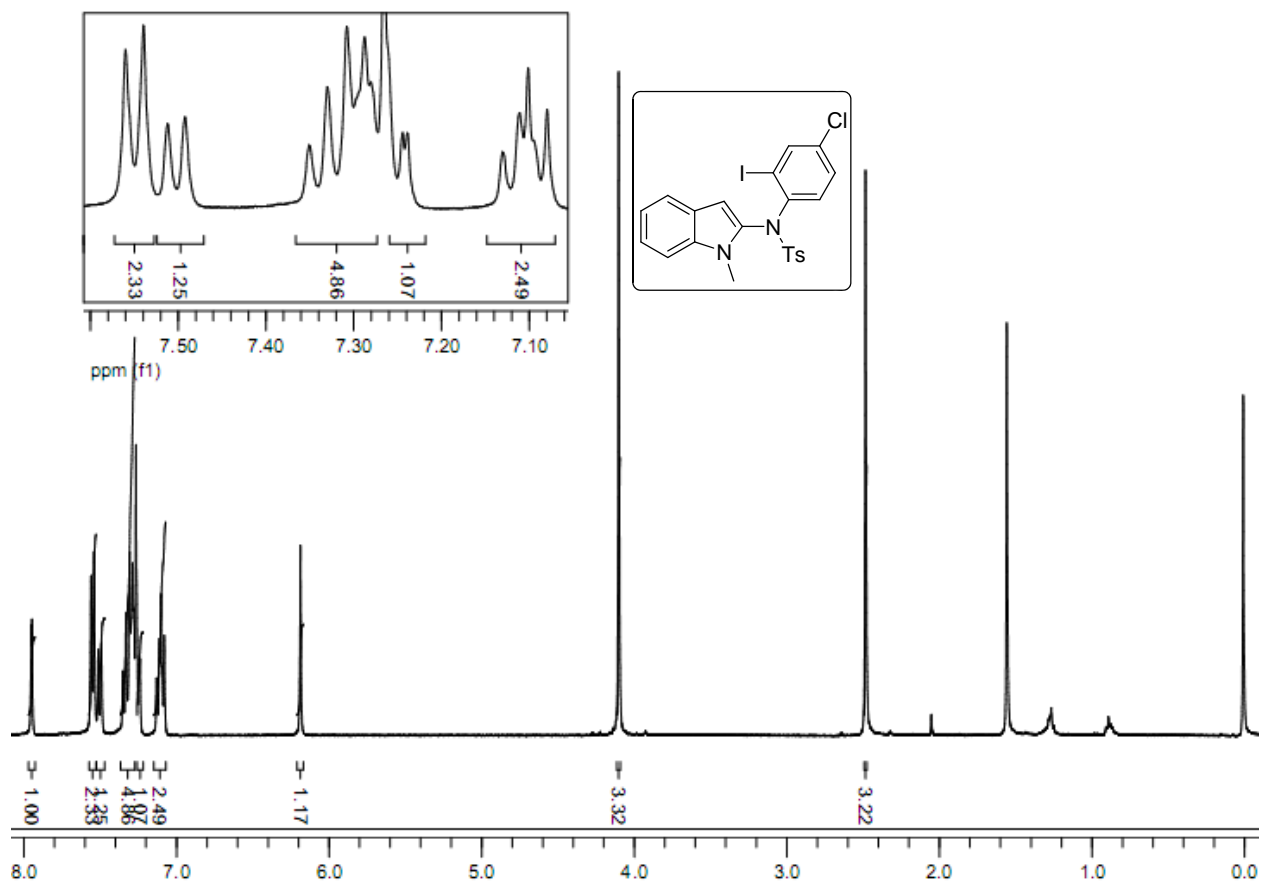

**3g**  $^1\text{H}$  NMR (400 MHz,  $\text{CDCl}_3$ )

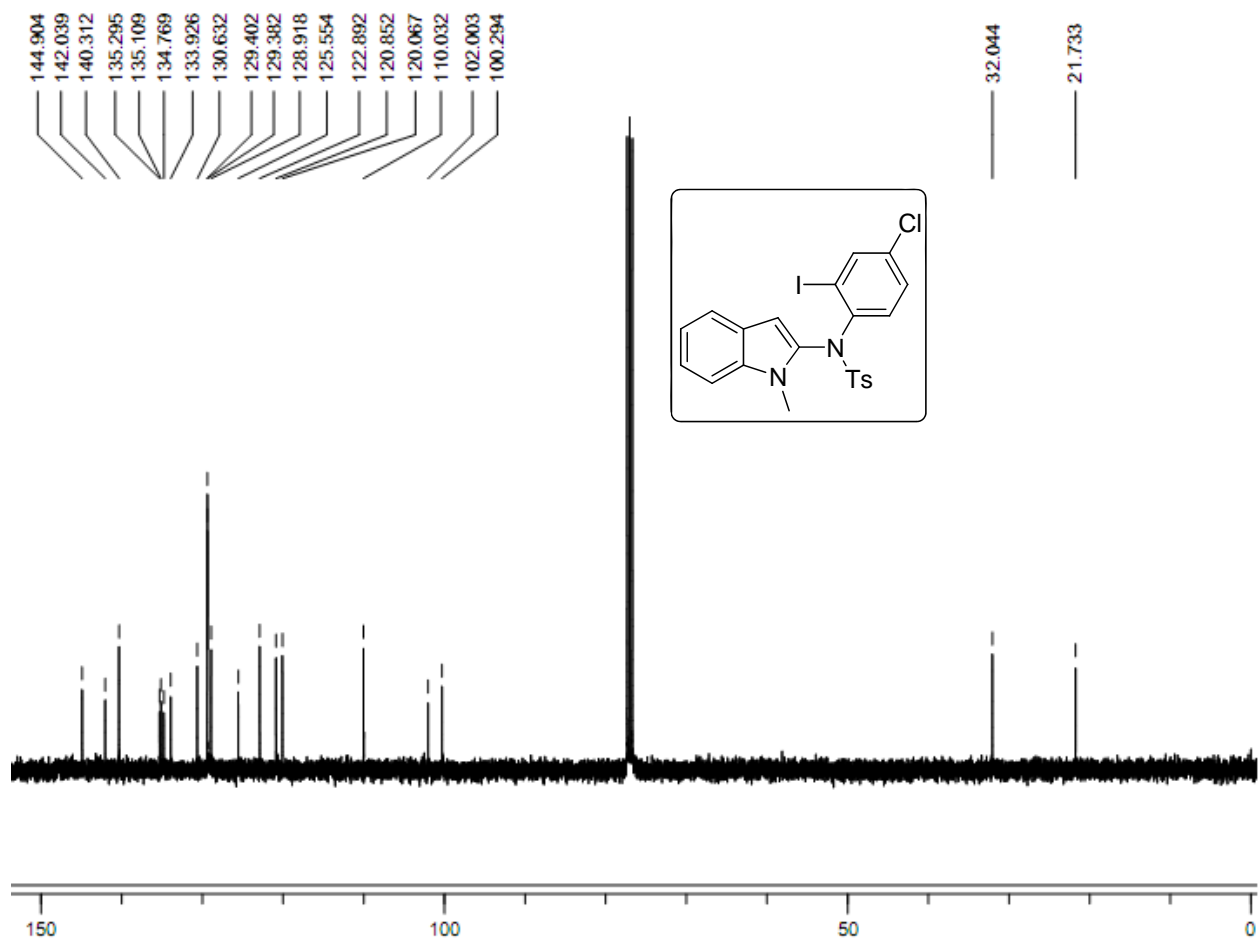



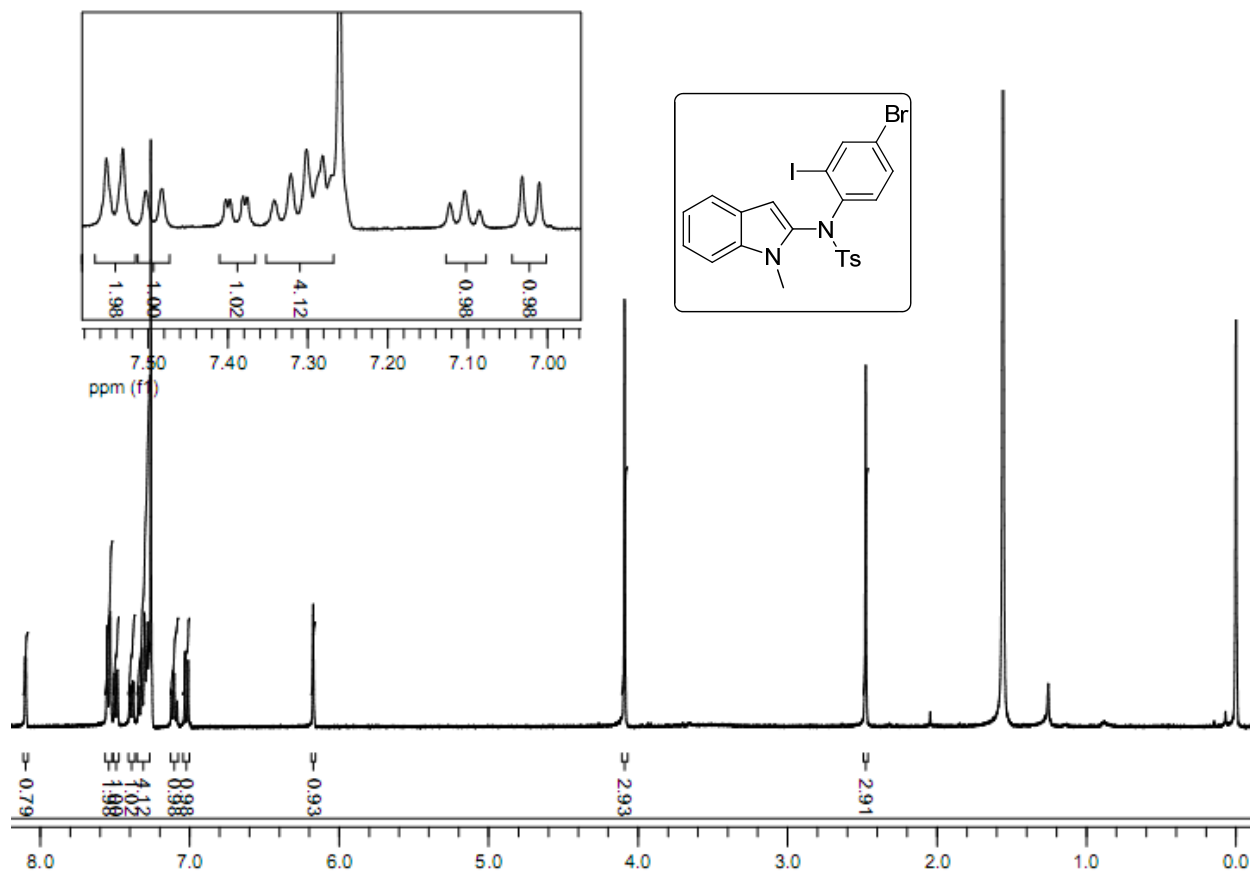

**3h**  $^1\text{H}$  NMR (400 MHz,  $\text{CDCl}_3$ )

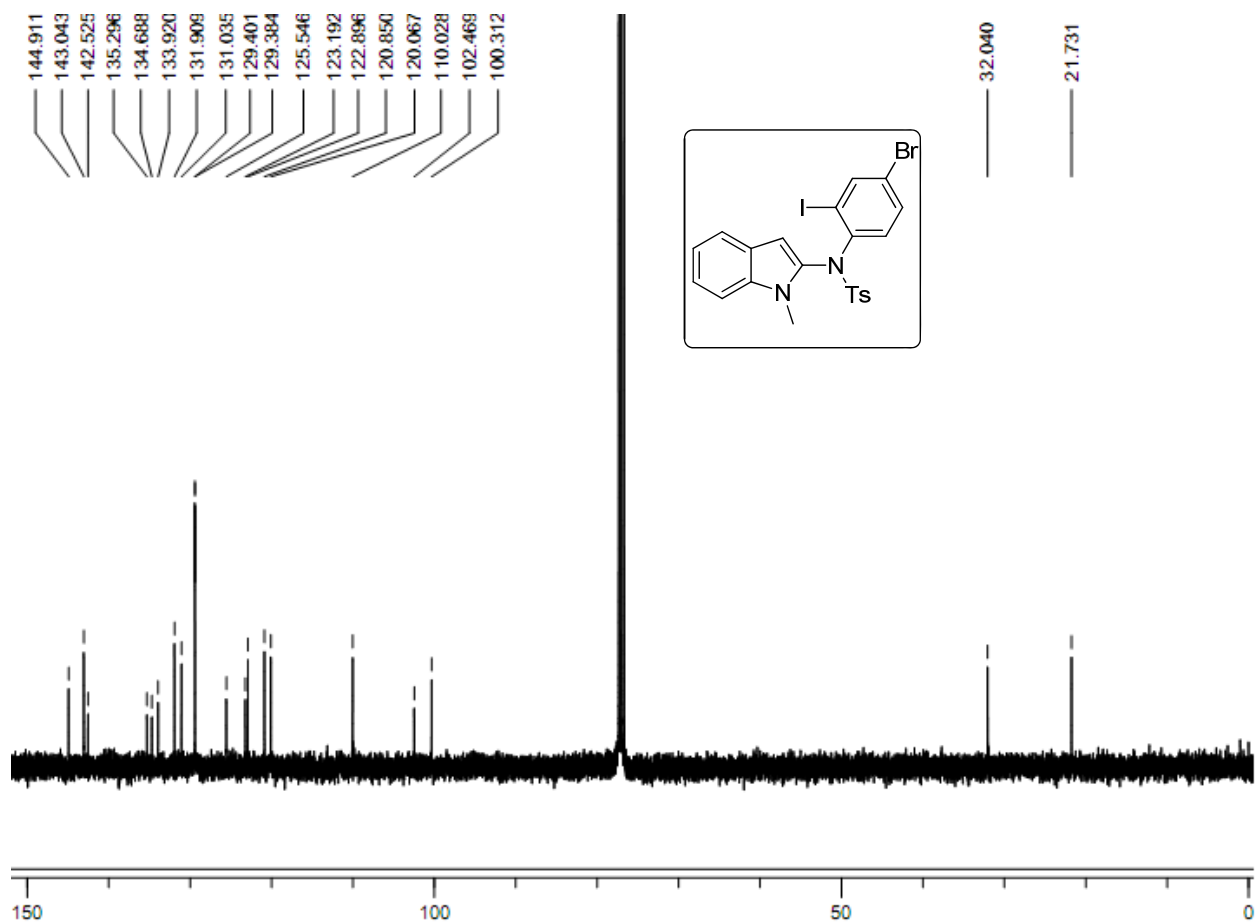

**3h**  $^{13}\text{C}$  NMR (100 MHz,  $\text{CDCl}_3$ )

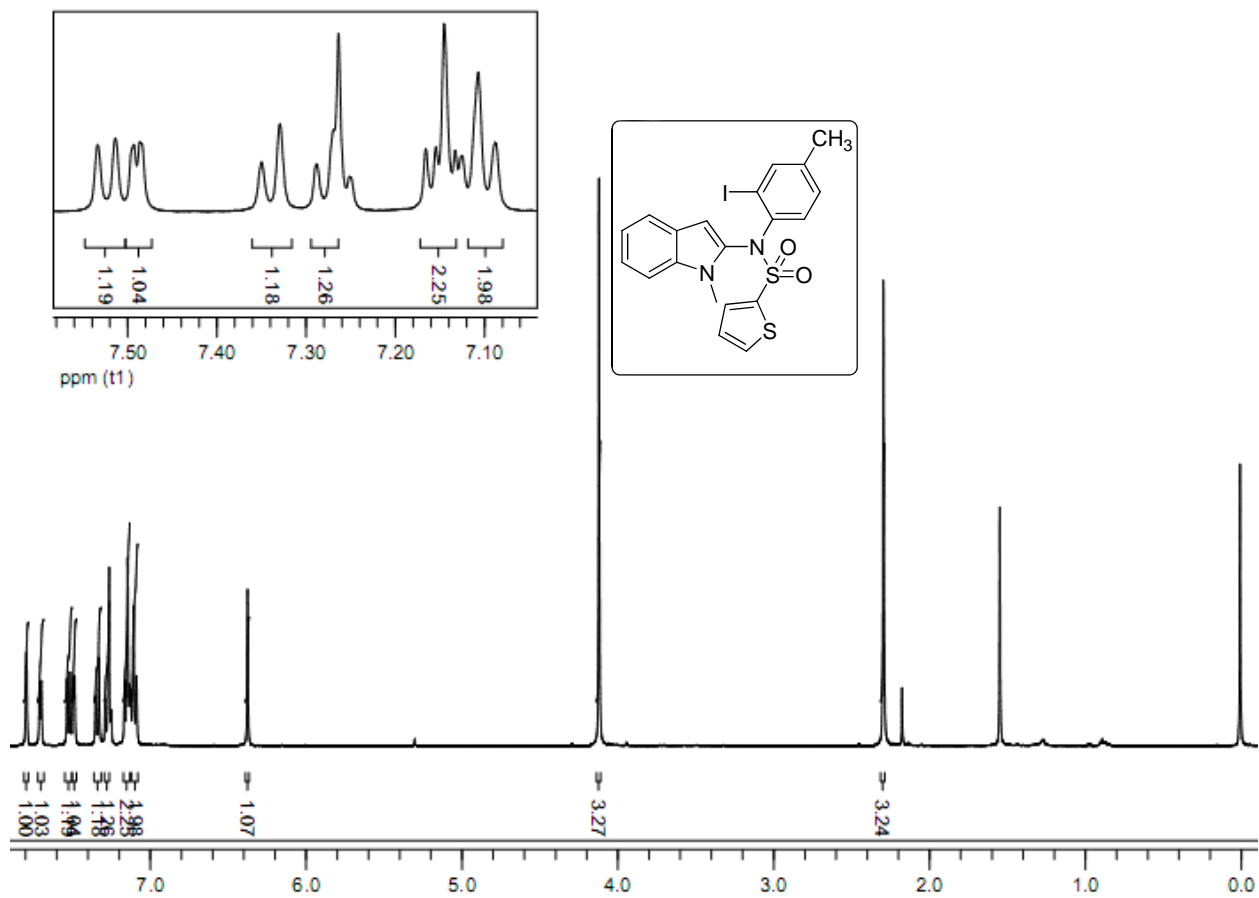

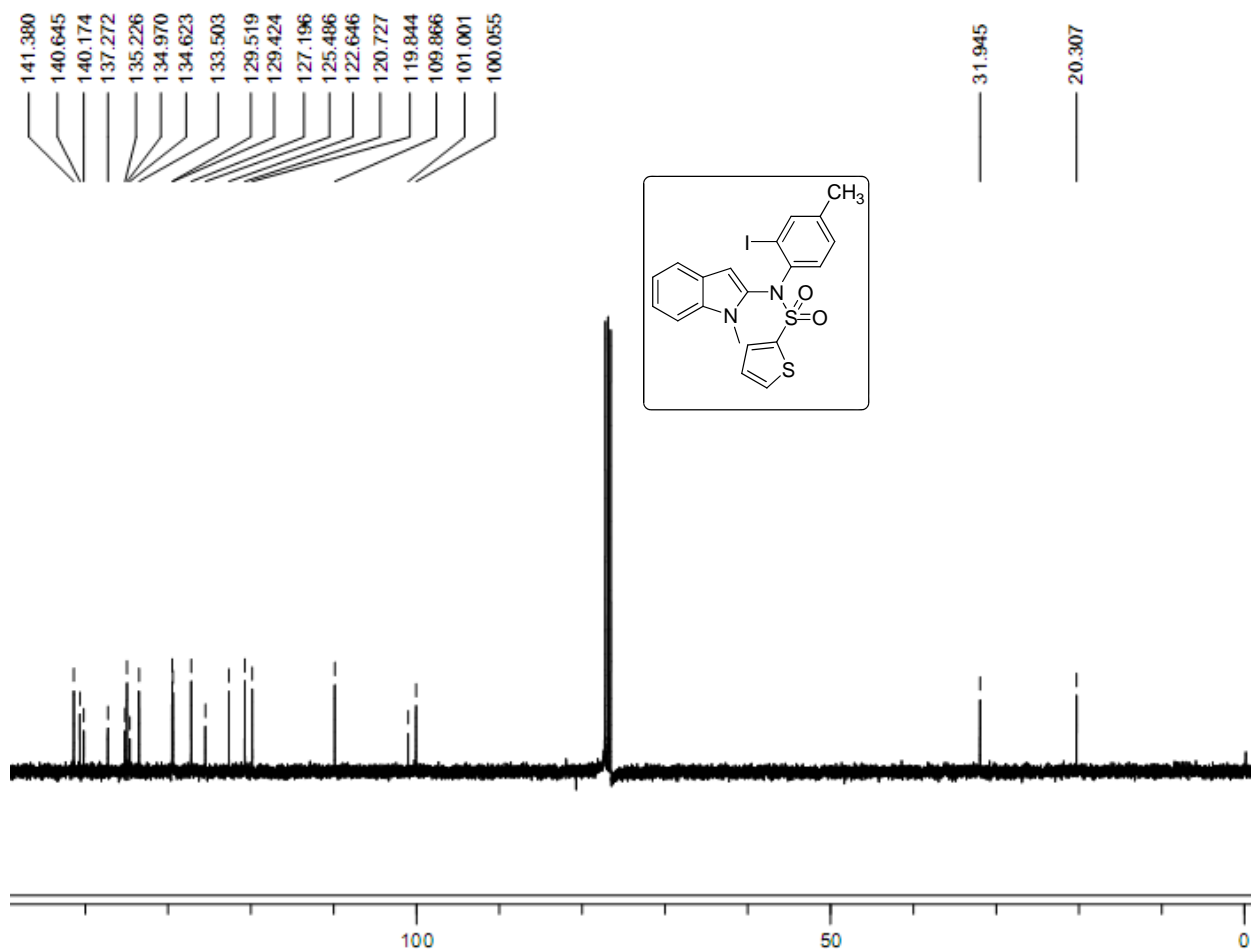

**3i**  $^{13}\text{C}$  NMR (100 MHz,  $\text{CDCl}_3$ )

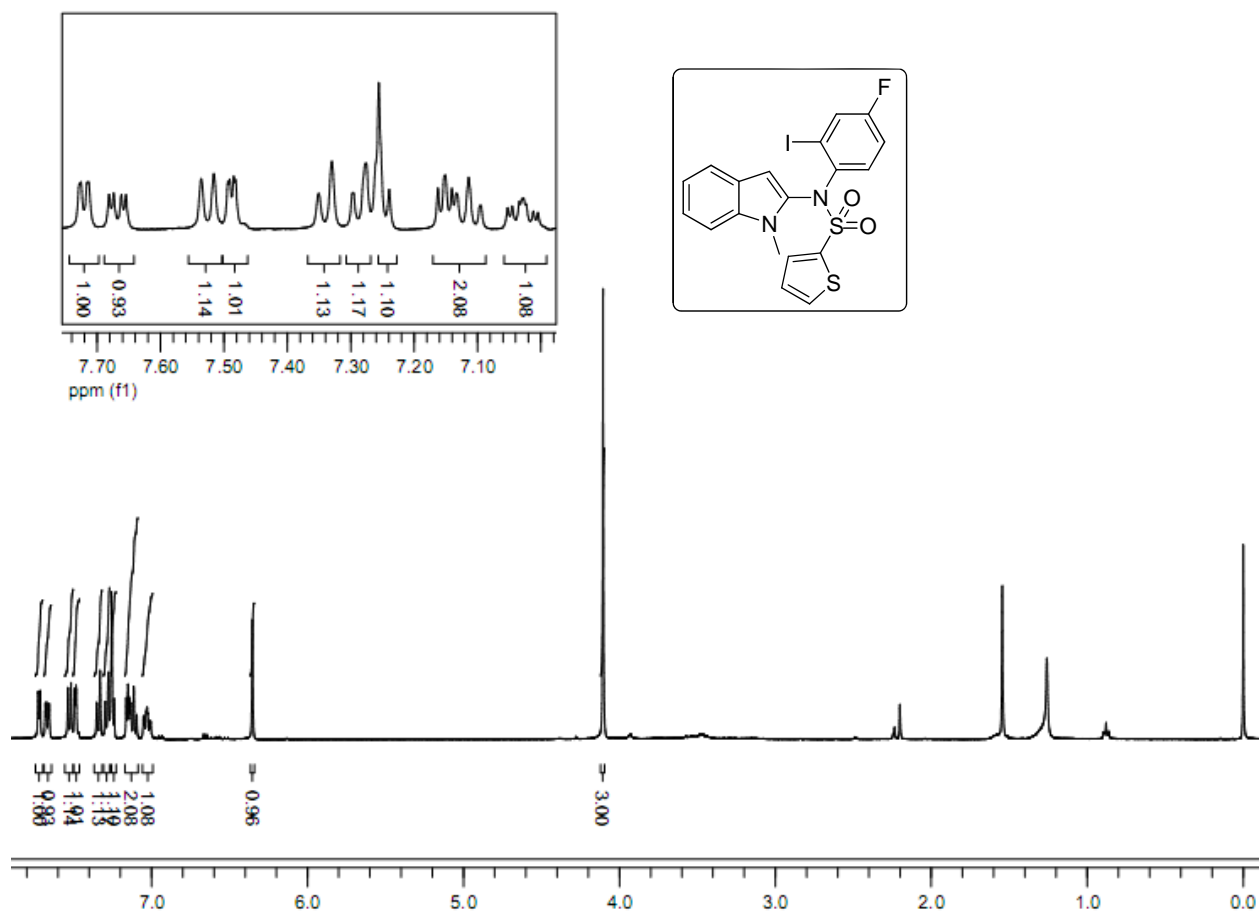

**3j**  $^1\text{H}$  NMR (400 MHz,  $\text{CDCl}_3$ )

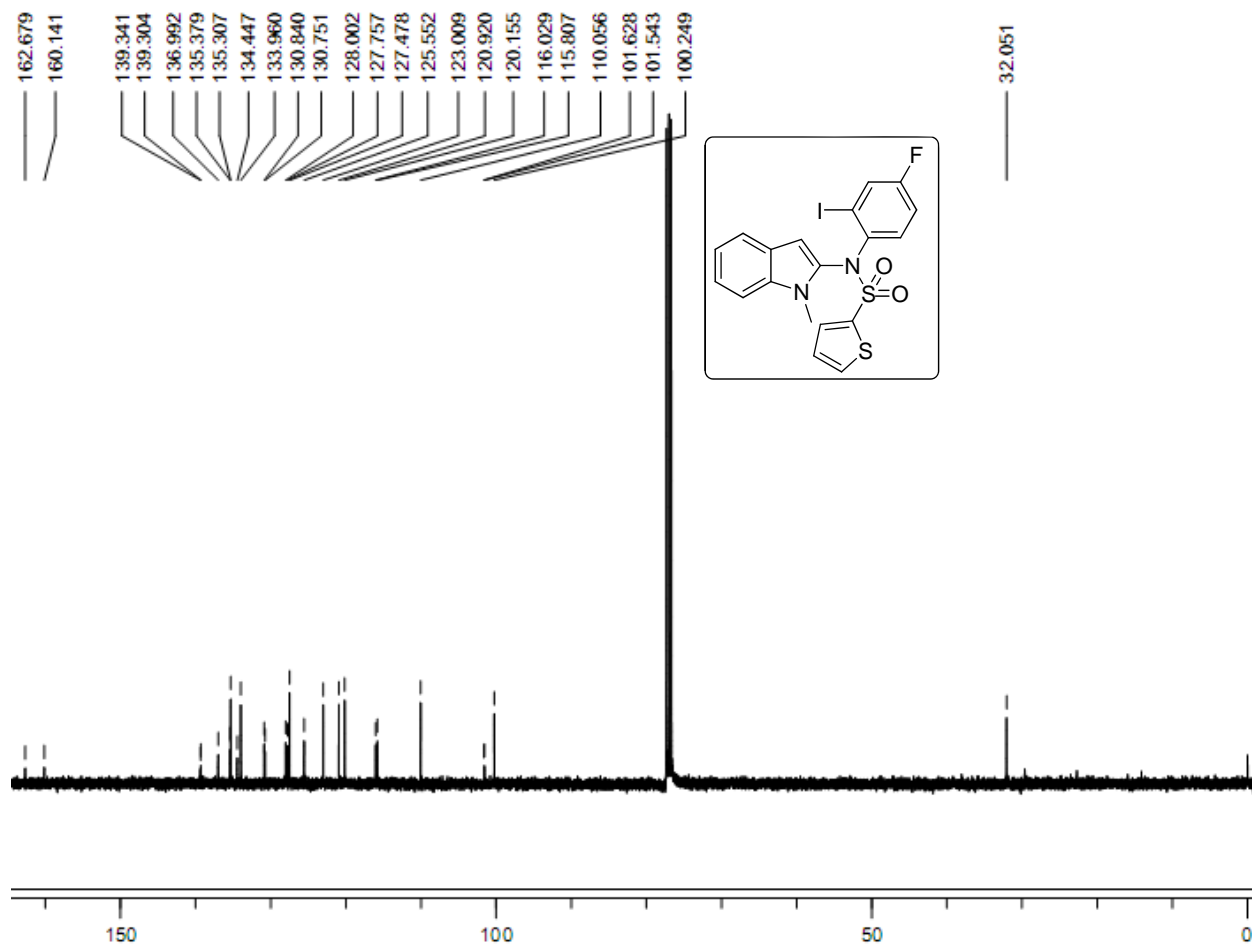

**3j**  $^{13}\text{C}$  NMR (100 MHz,  $\text{CDCl}_3$ )

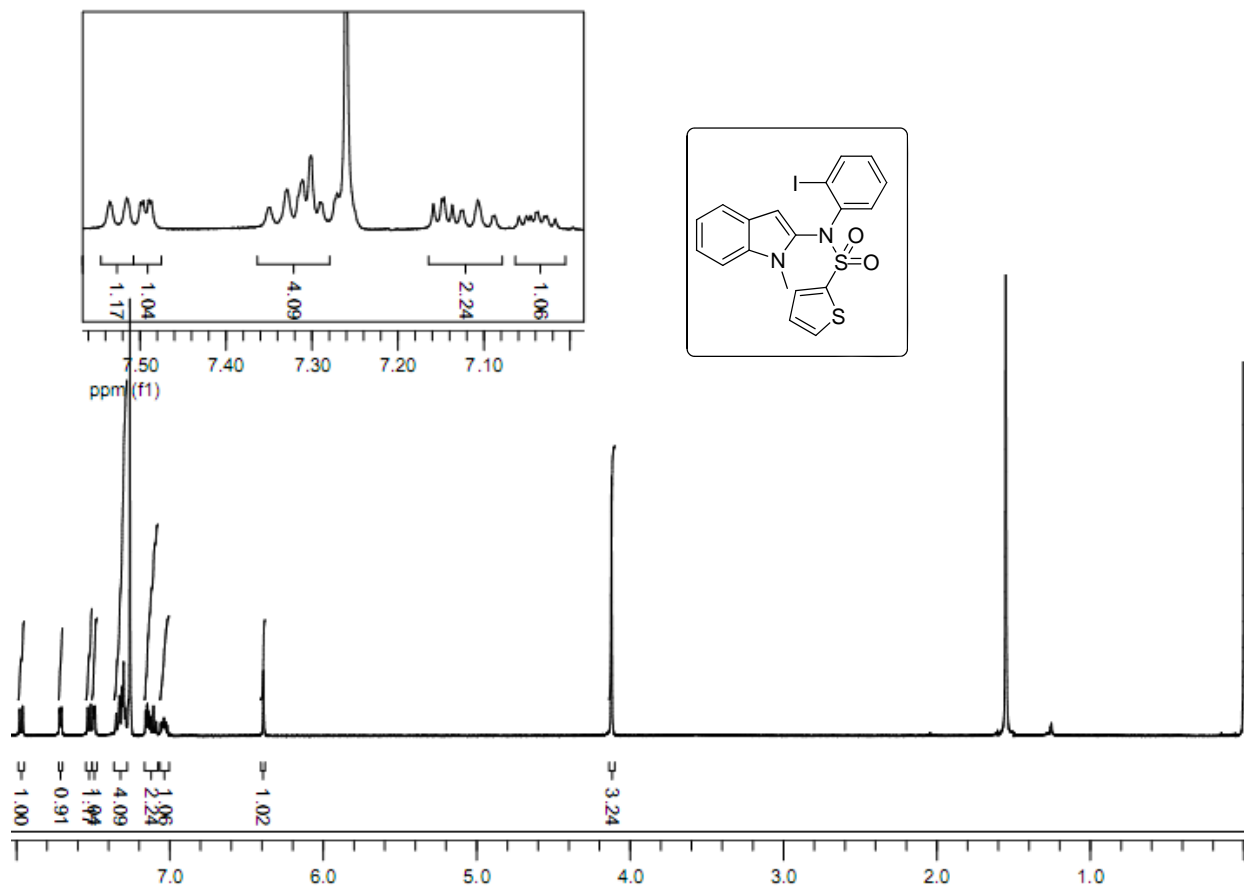

**3k**  $^1\text{H}$  NMR (400 MHz,  $\text{CDCl}_3$ )

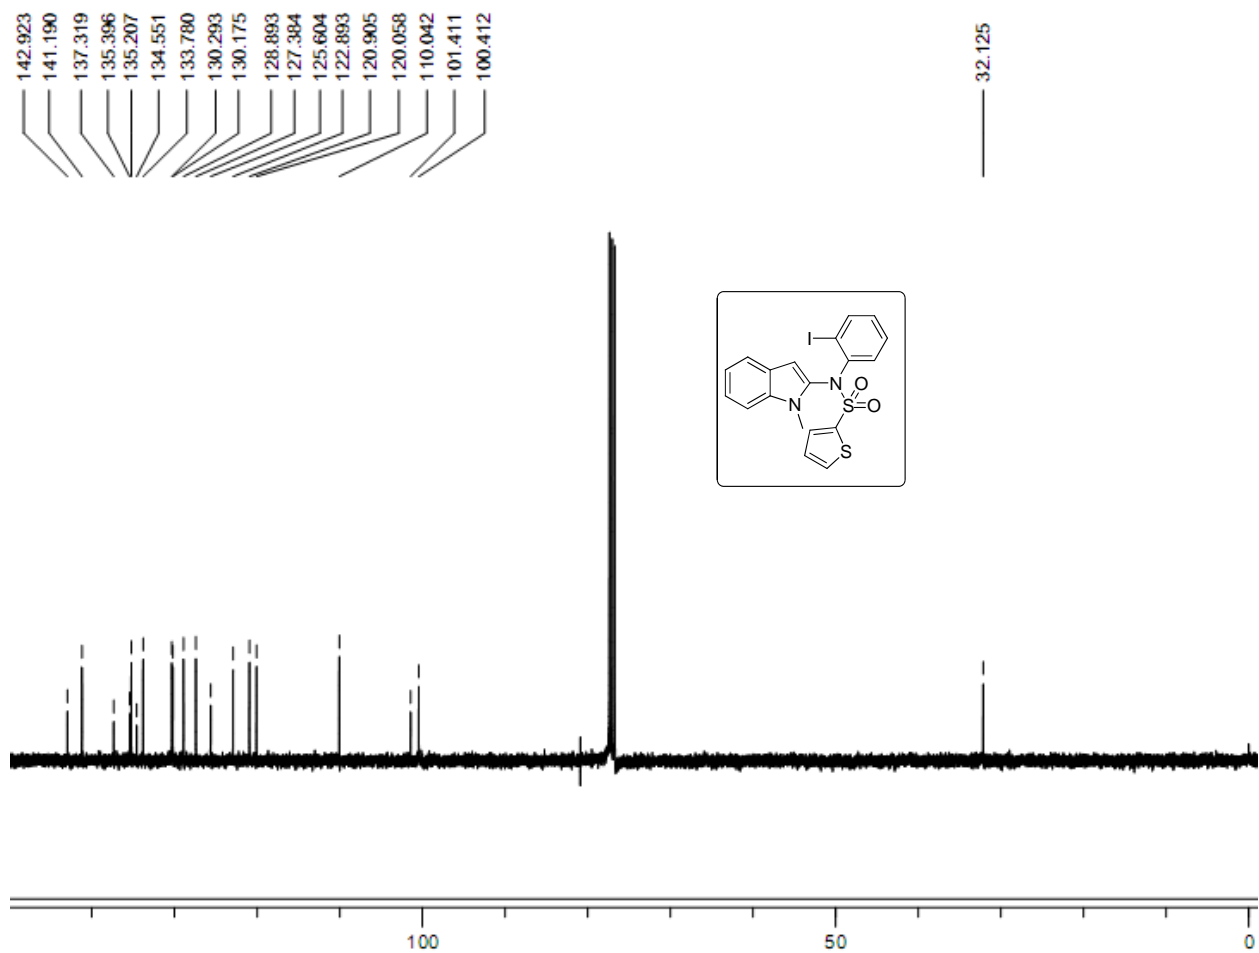

**3k**  $^{13}\text{C}$  NMR (100 MHz,  $\text{CDCl}_3$ )



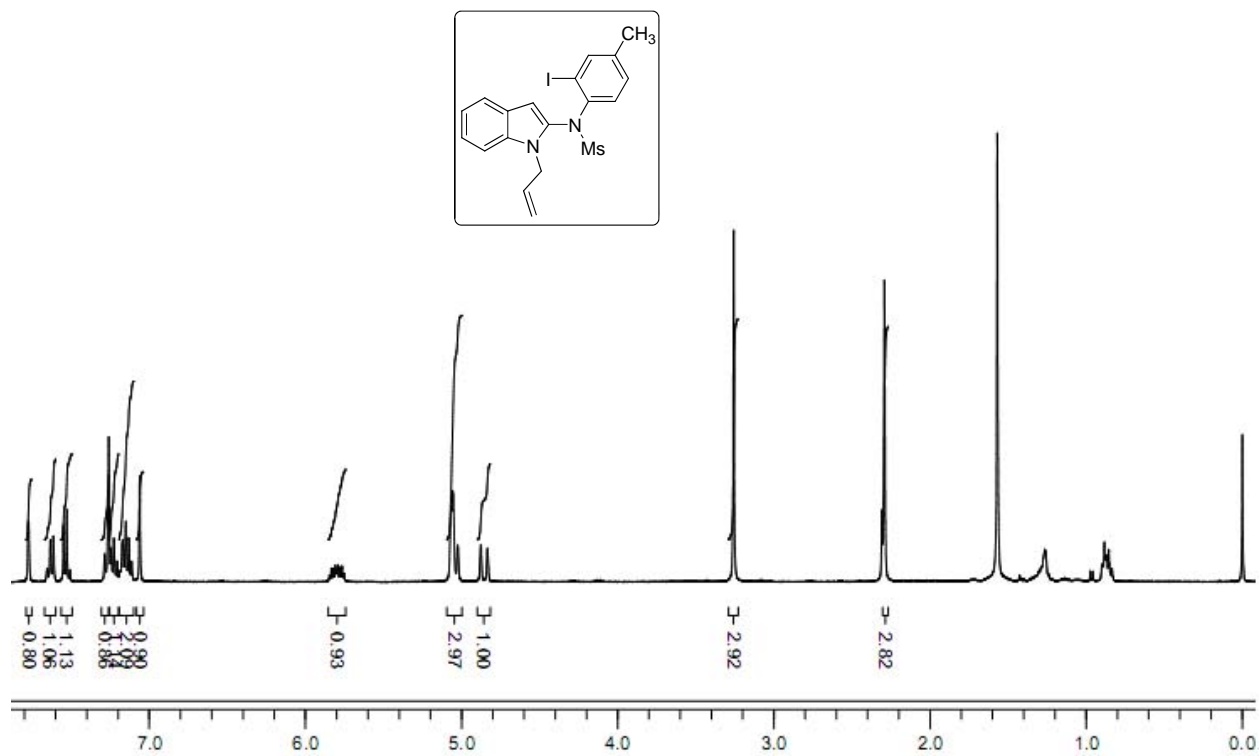

**31**  $^1\text{H}$  NMR (400 MHz,  $\text{CDCl}_3$ )

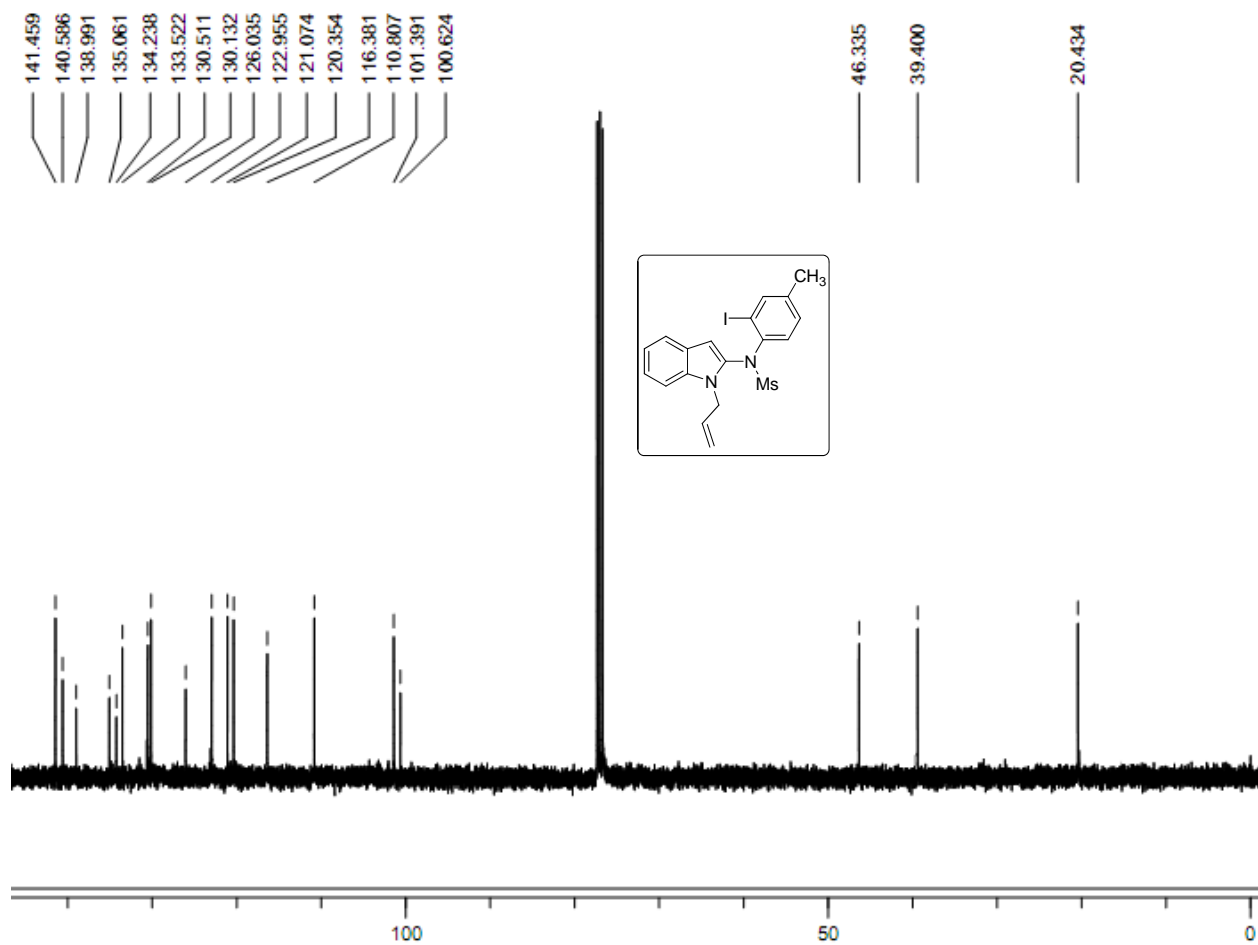

**3I** <sup>13</sup>C NMR (100 MHz, CDCl<sub>3</sub>)

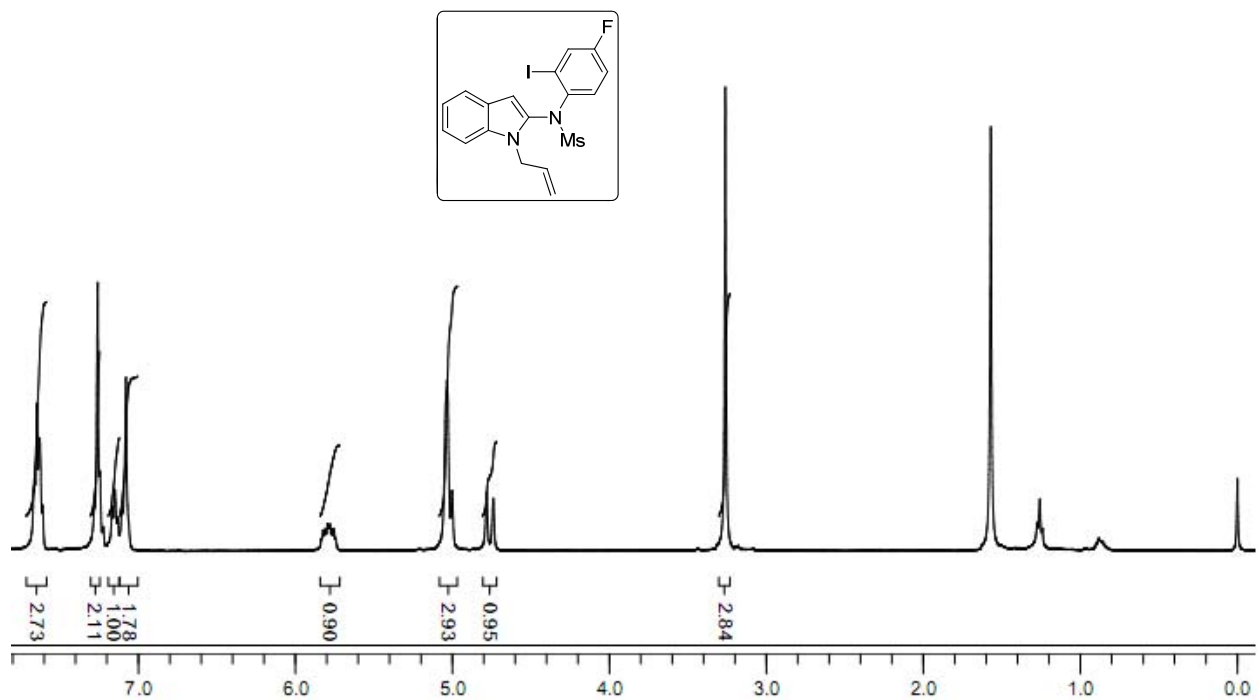

**3m**  $^1\text{H}$  NMR (400 MHz,  $\text{CDCl}_3$ )

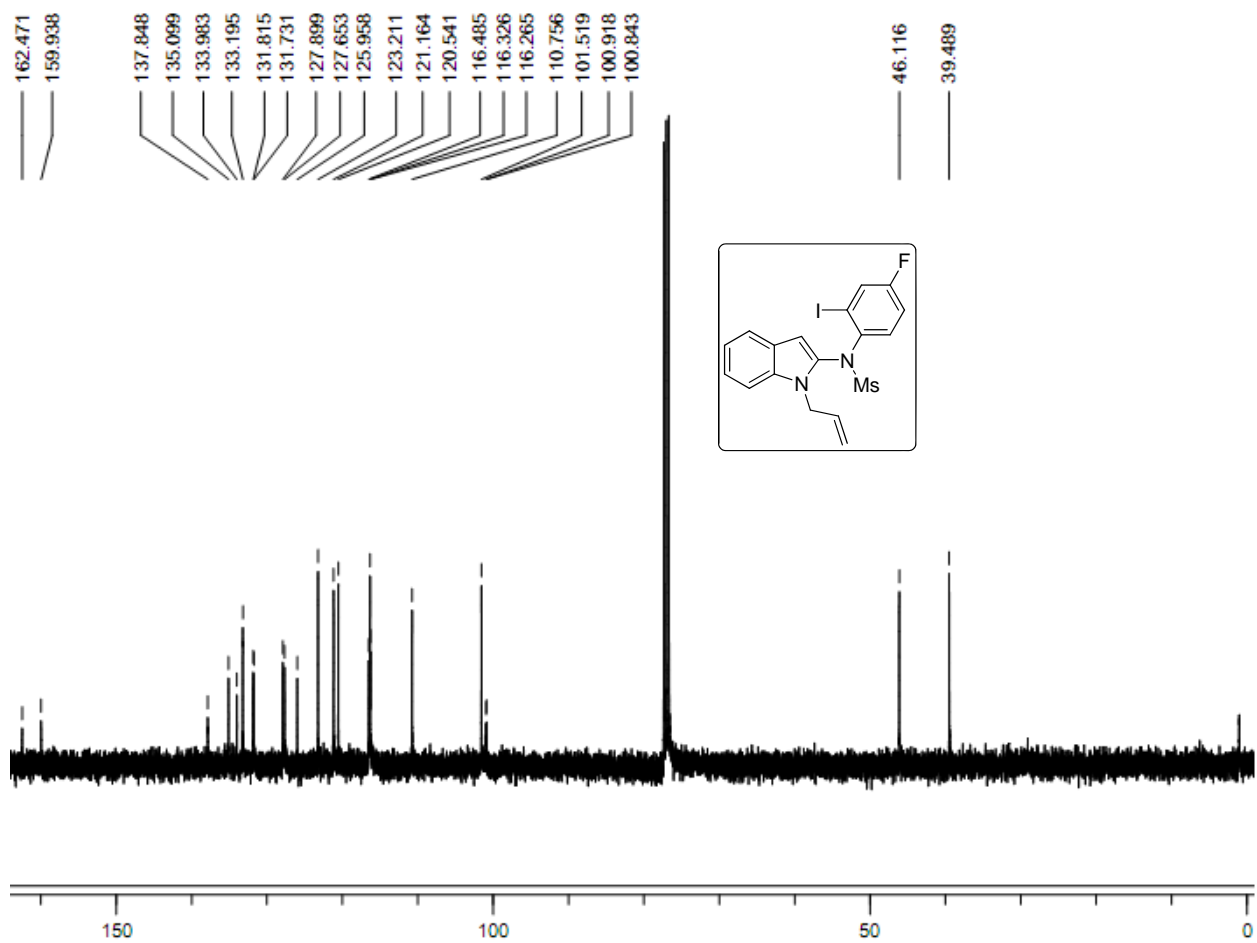

**3m**  $^{13}\text{C}$  NMR (100 MHz,  $\text{CDCl}_3$ )

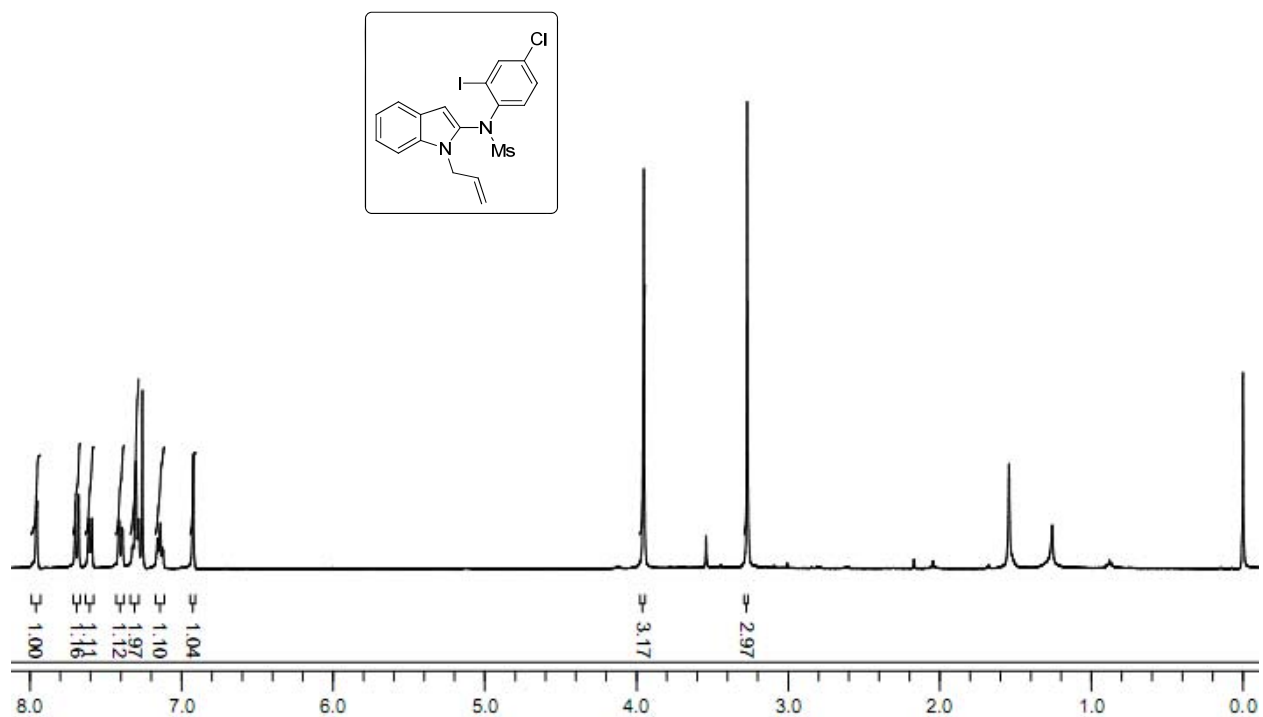

**3n** <sup>1</sup>H NMR (400 MHz, CDCl<sub>3</sub>)

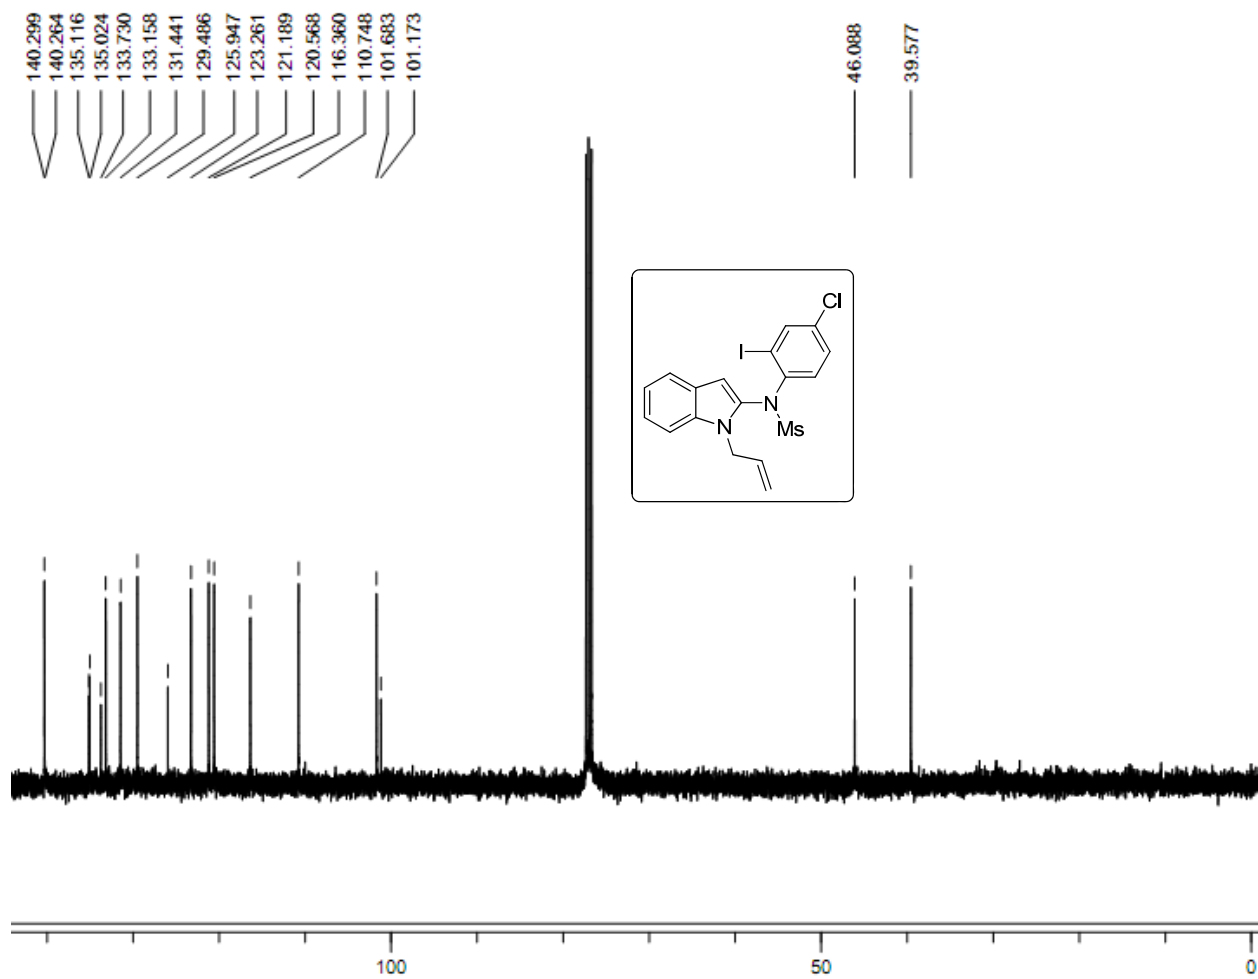

**3n**  $^{13}\text{C}$  NMR (100 MHz,  $\text{CDCl}_3$ )

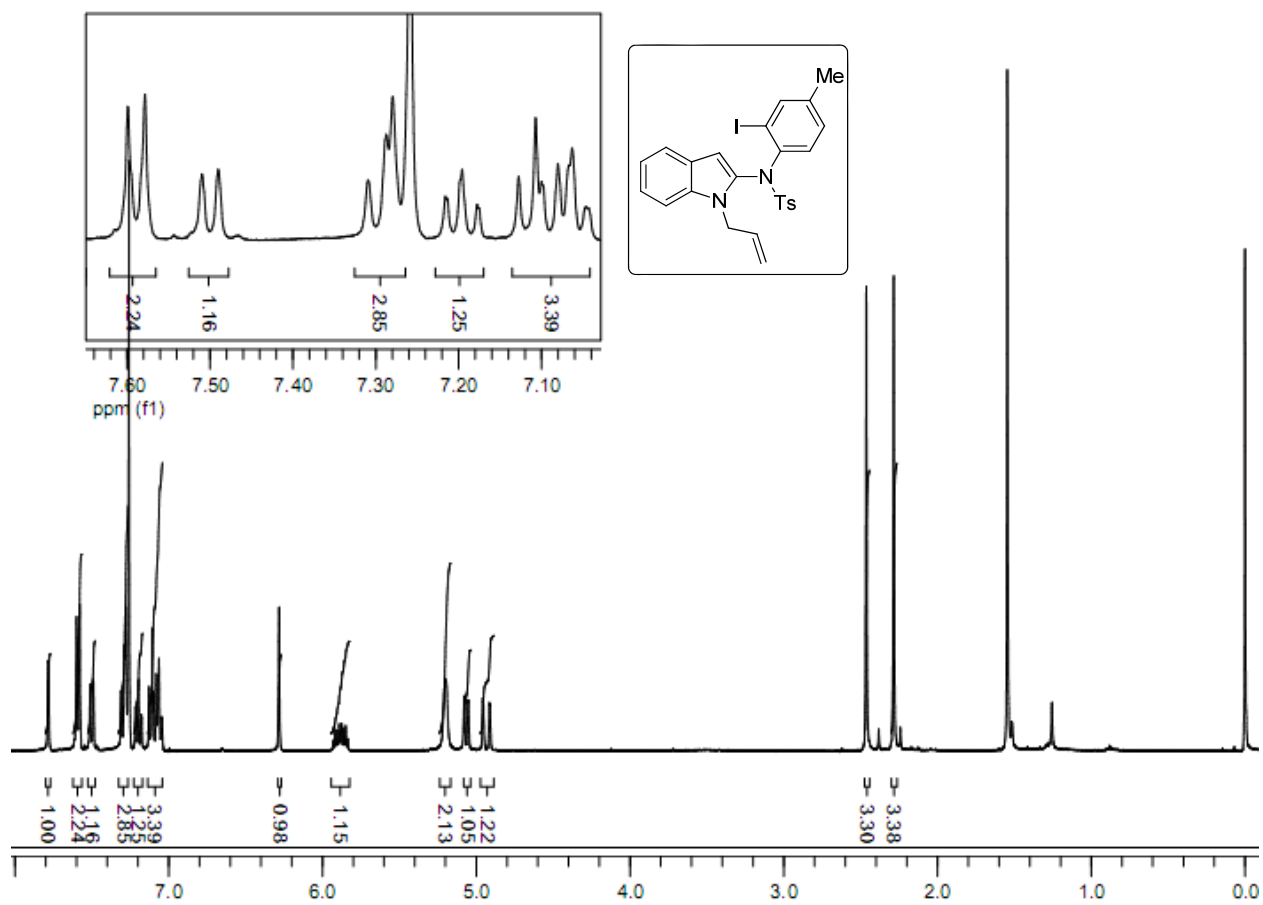

**3o**  $^1\text{H}$  NMR (400 MHz,  $\text{CDCl}_3$ )

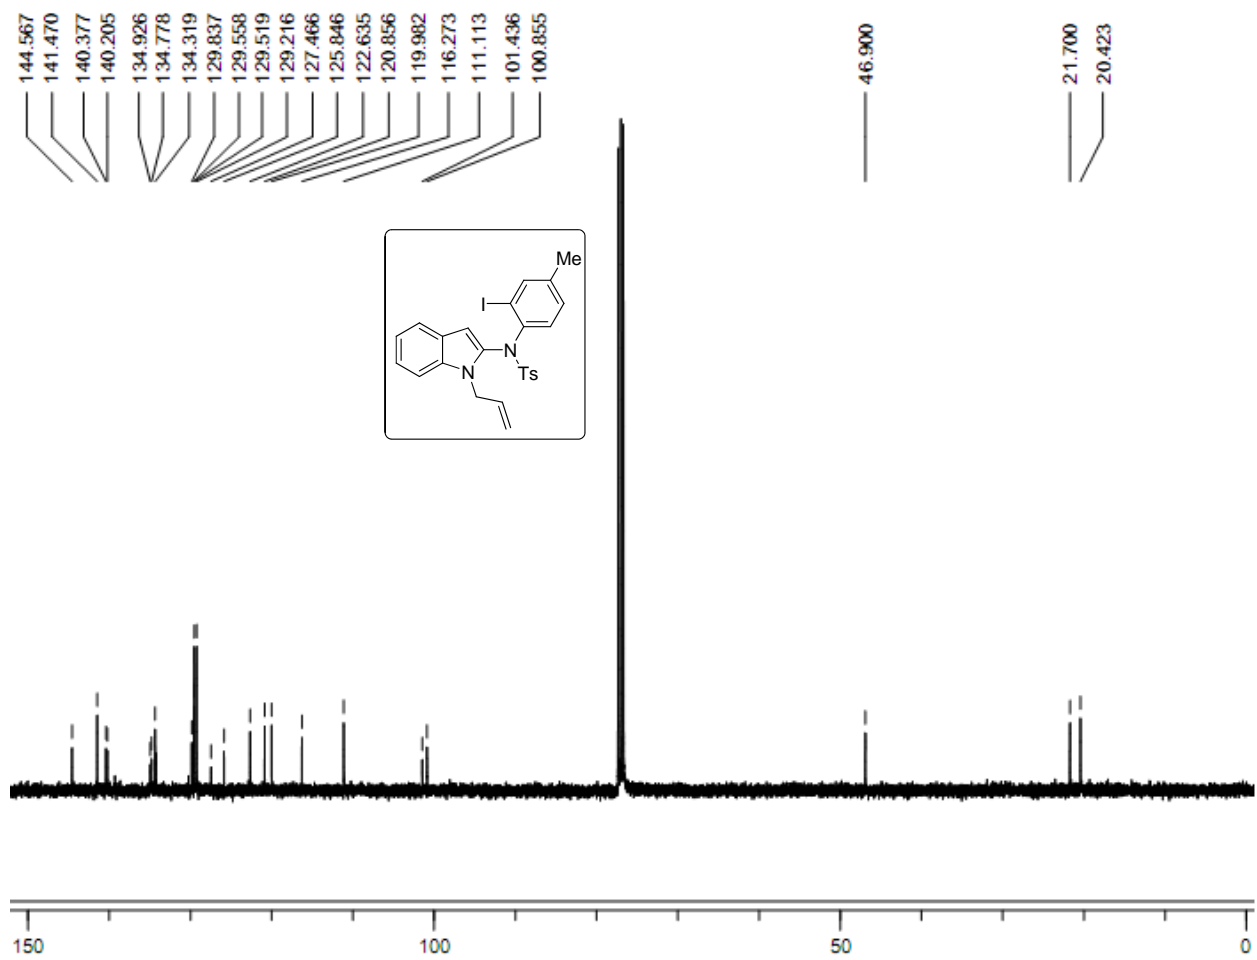

**3o**  $^{13}\text{C}$  NMR (100 MHz,  $\text{CDCl}_3$ )



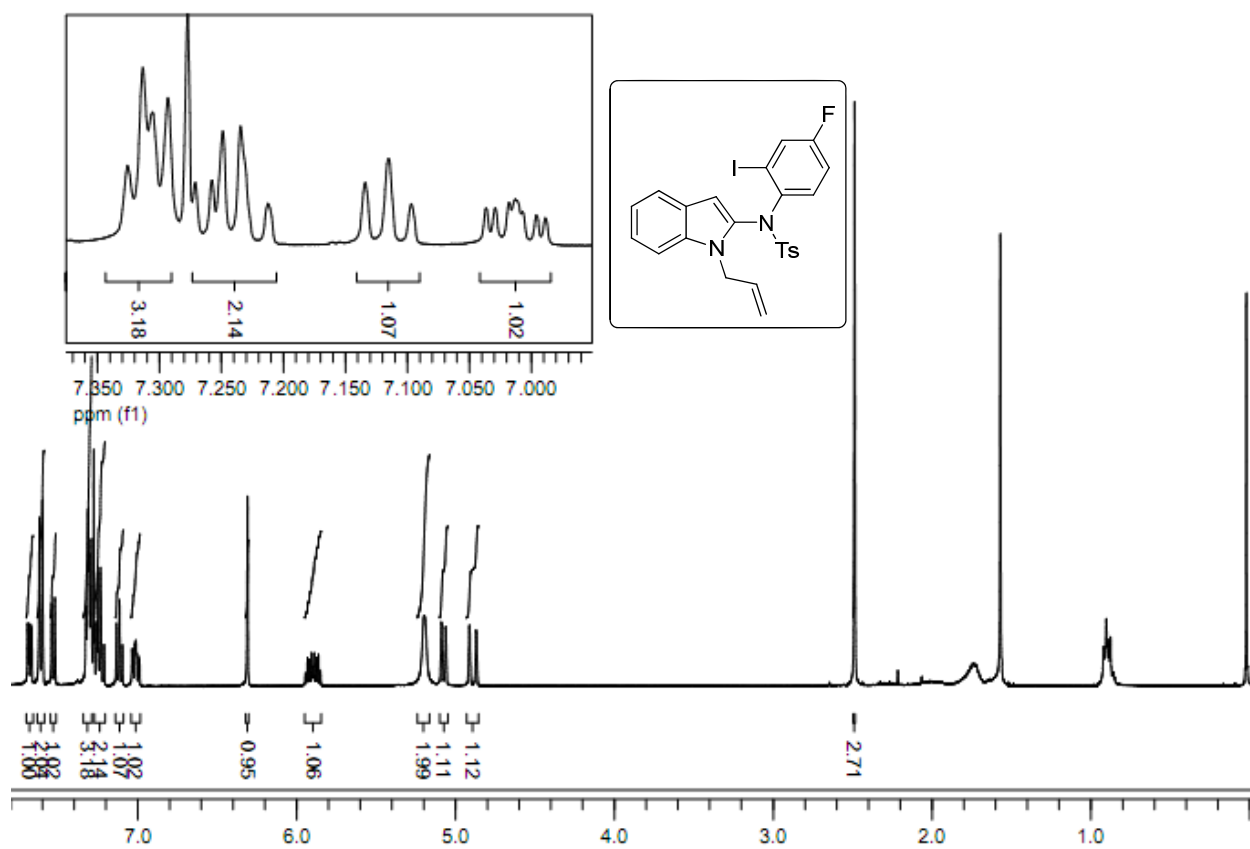

**3p**  $^1\text{H}$  NMR (400 MHz,  $\text{CDCl}_3$ )

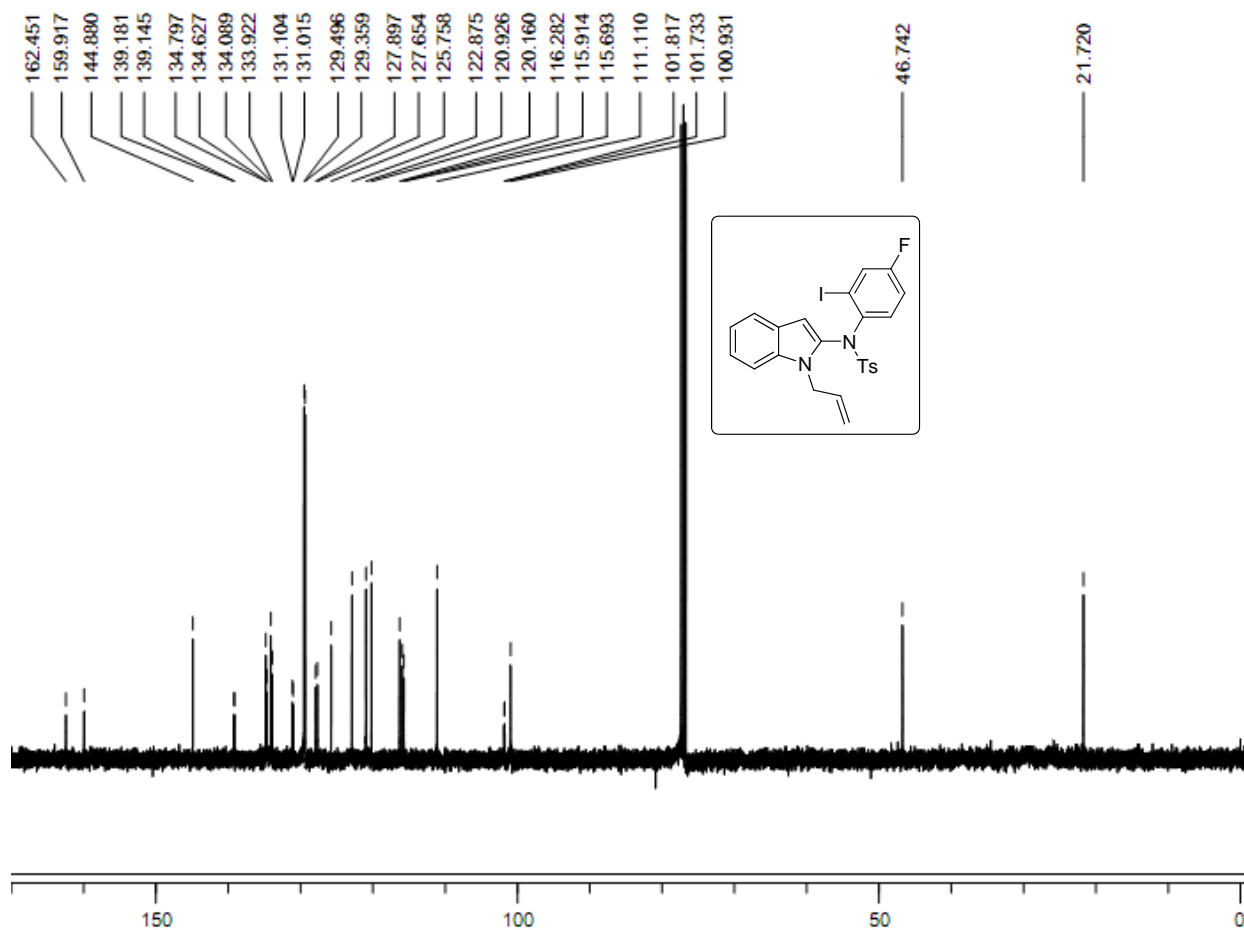

**3p**  $^{13}\text{C}$  NMR (100 MHz,  $\text{CDCl}_3$ )

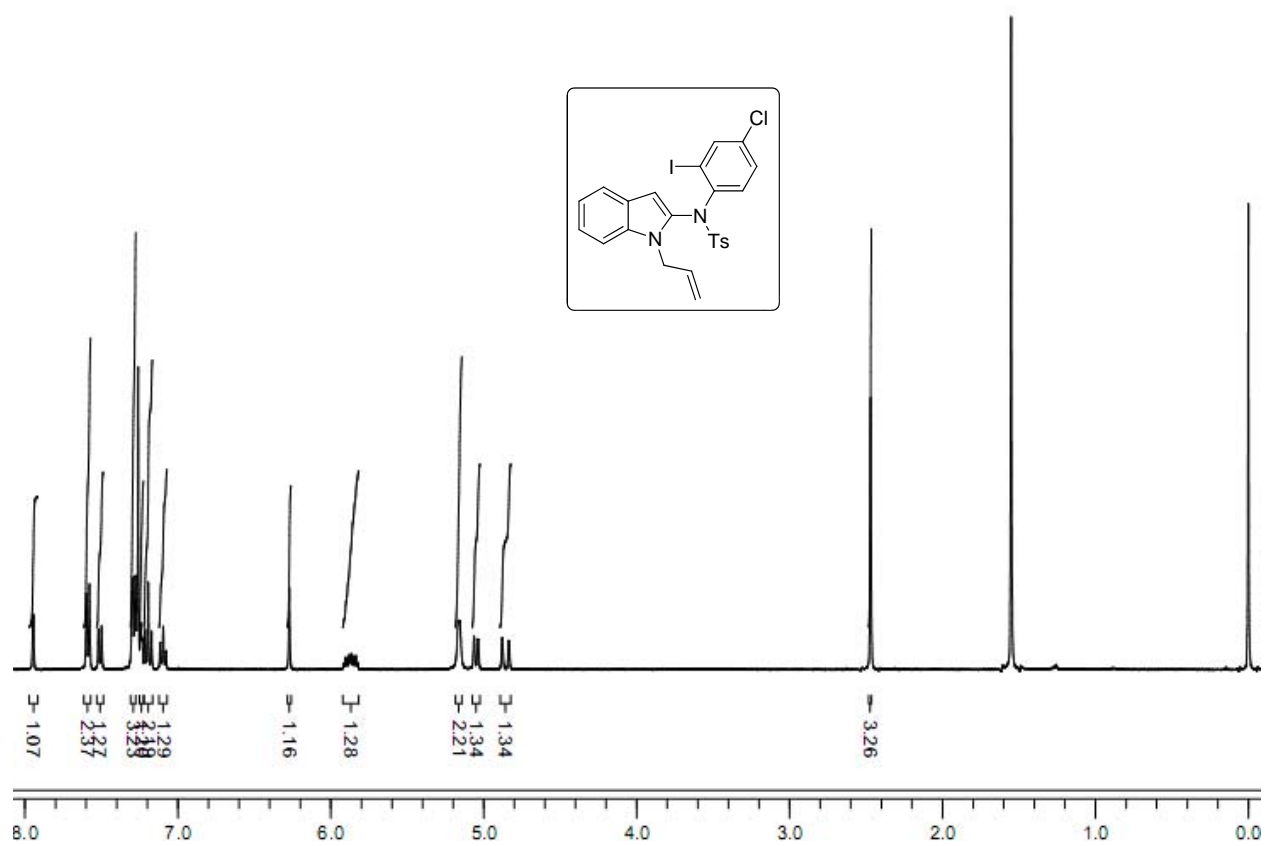

**3q**  $^1\text{H}$  NMR (400 MHz,  $\text{CDCl}_3$ )

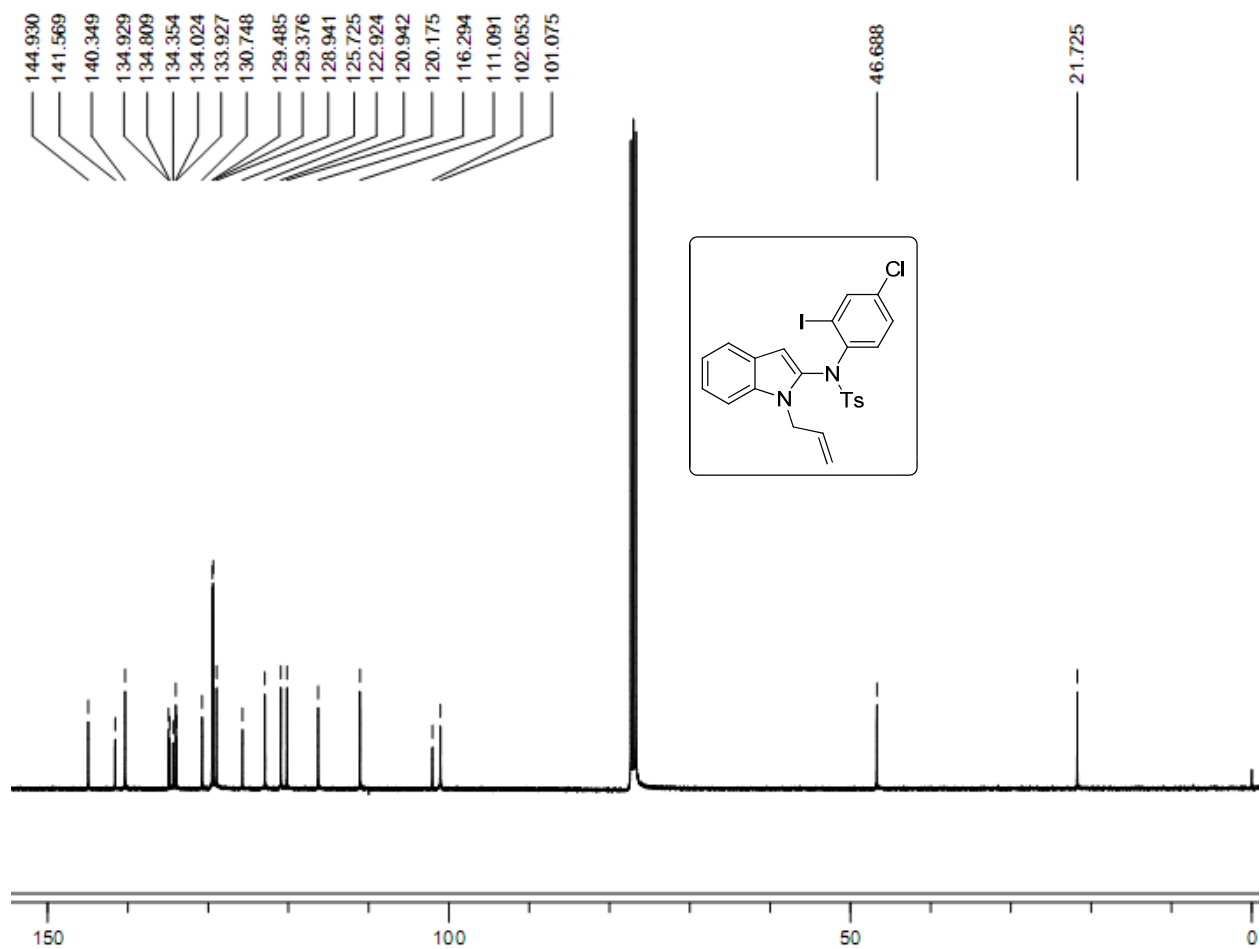

**3q**  $^{13}\text{C}$  NMR (100 MHz,  $\text{CDCl}_3$ )

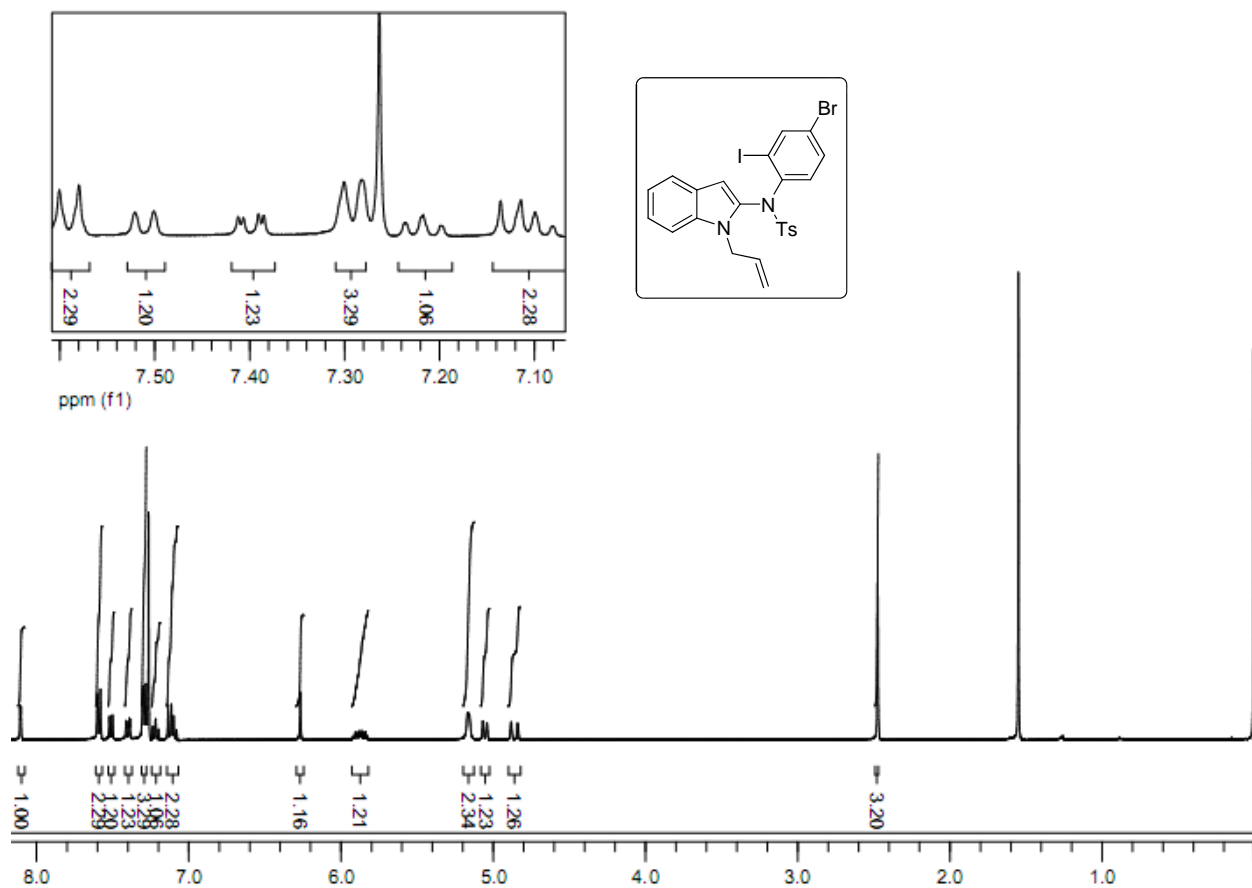

**3r**  $^1\text{H}$  NMR (400 MHz,  $\text{CDCl}_3$ )

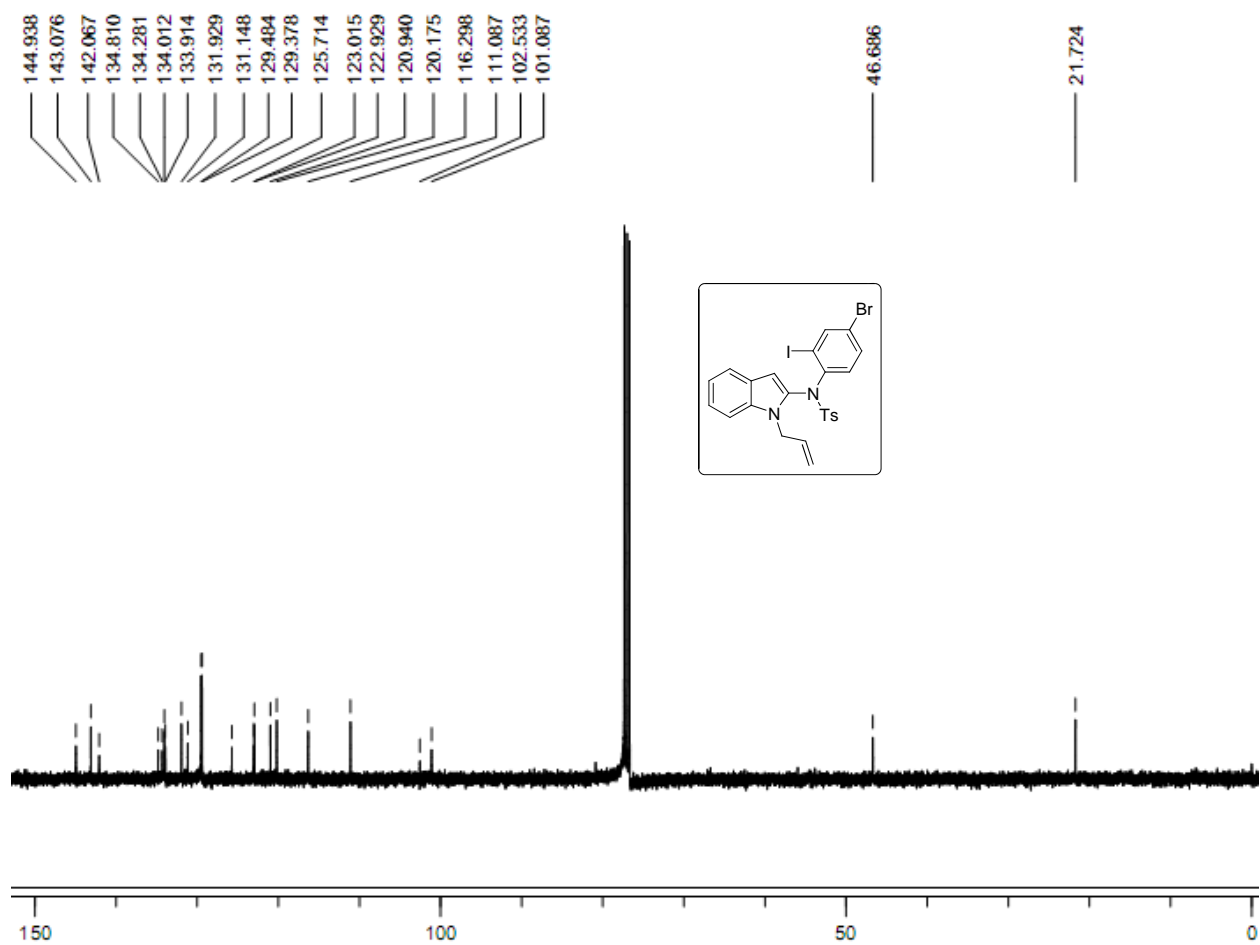

**3r**  $^{13}\text{C}$  NMR (100 MHz,  $\text{CDCl}_3$ )

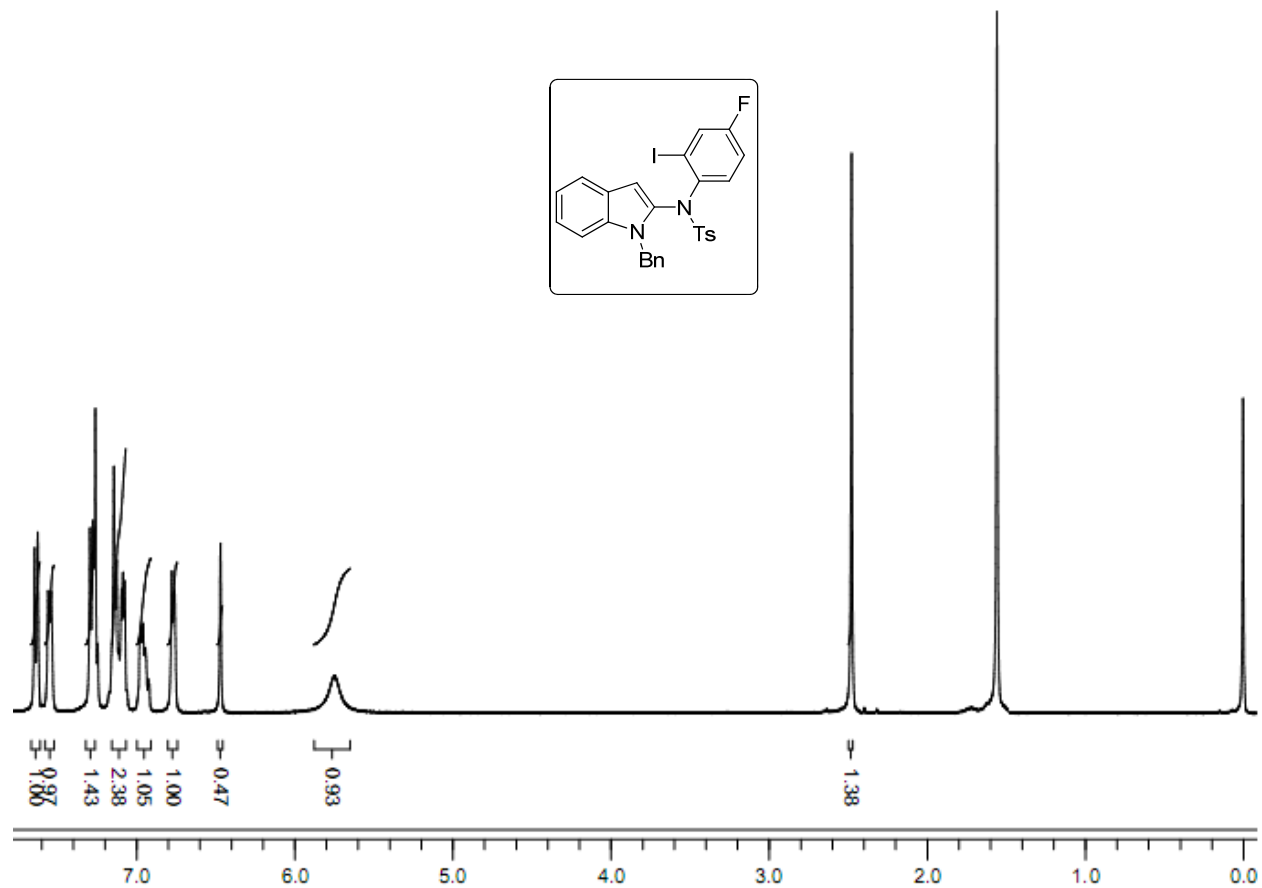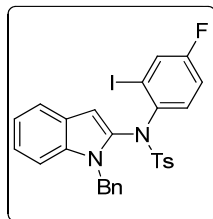

**3s**  $^1\text{H}$  NMR (400 MHz,  $\text{CDCl}_3$ )

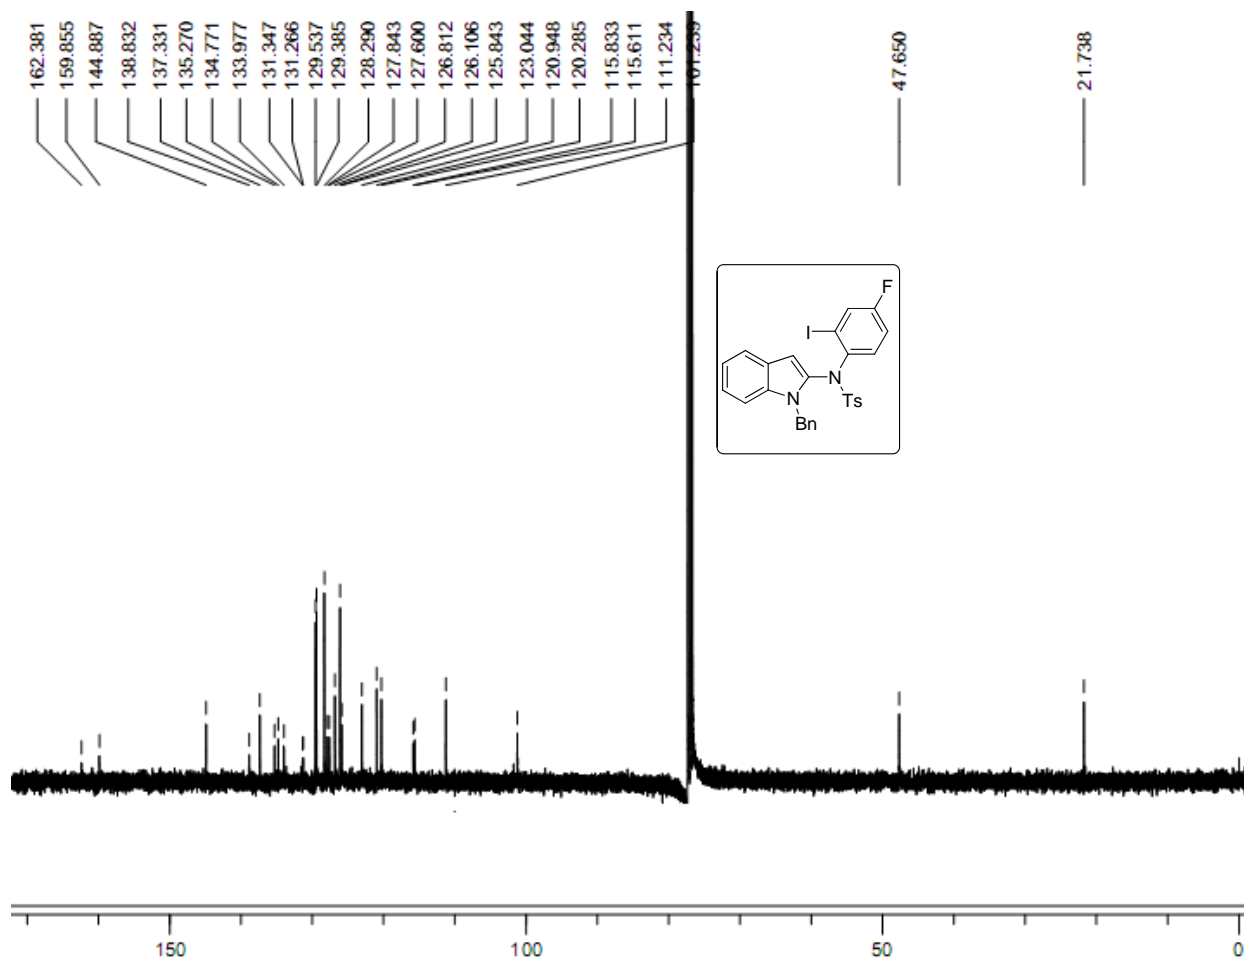

**3s** <sup>13</sup>C NMR (100 MHz, CDCl<sub>3</sub>)



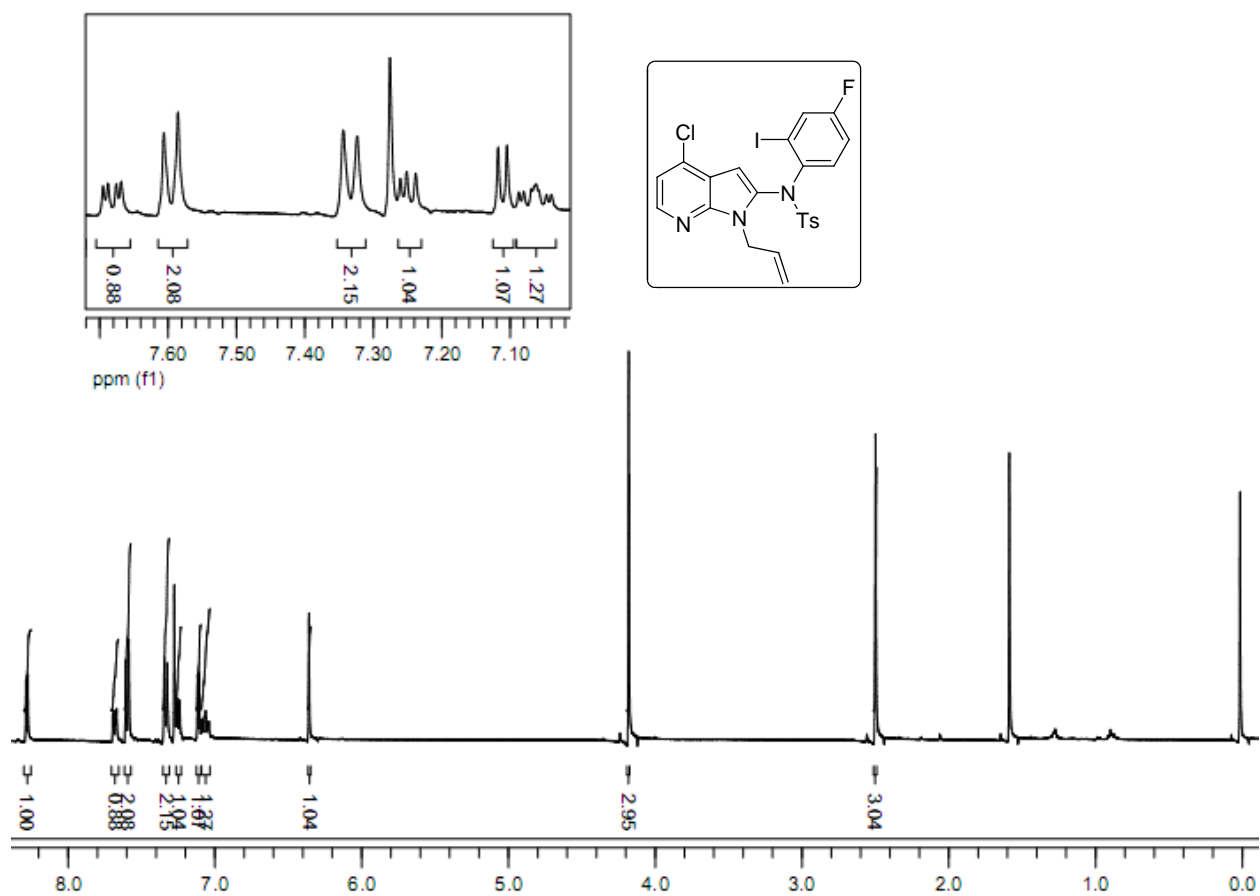

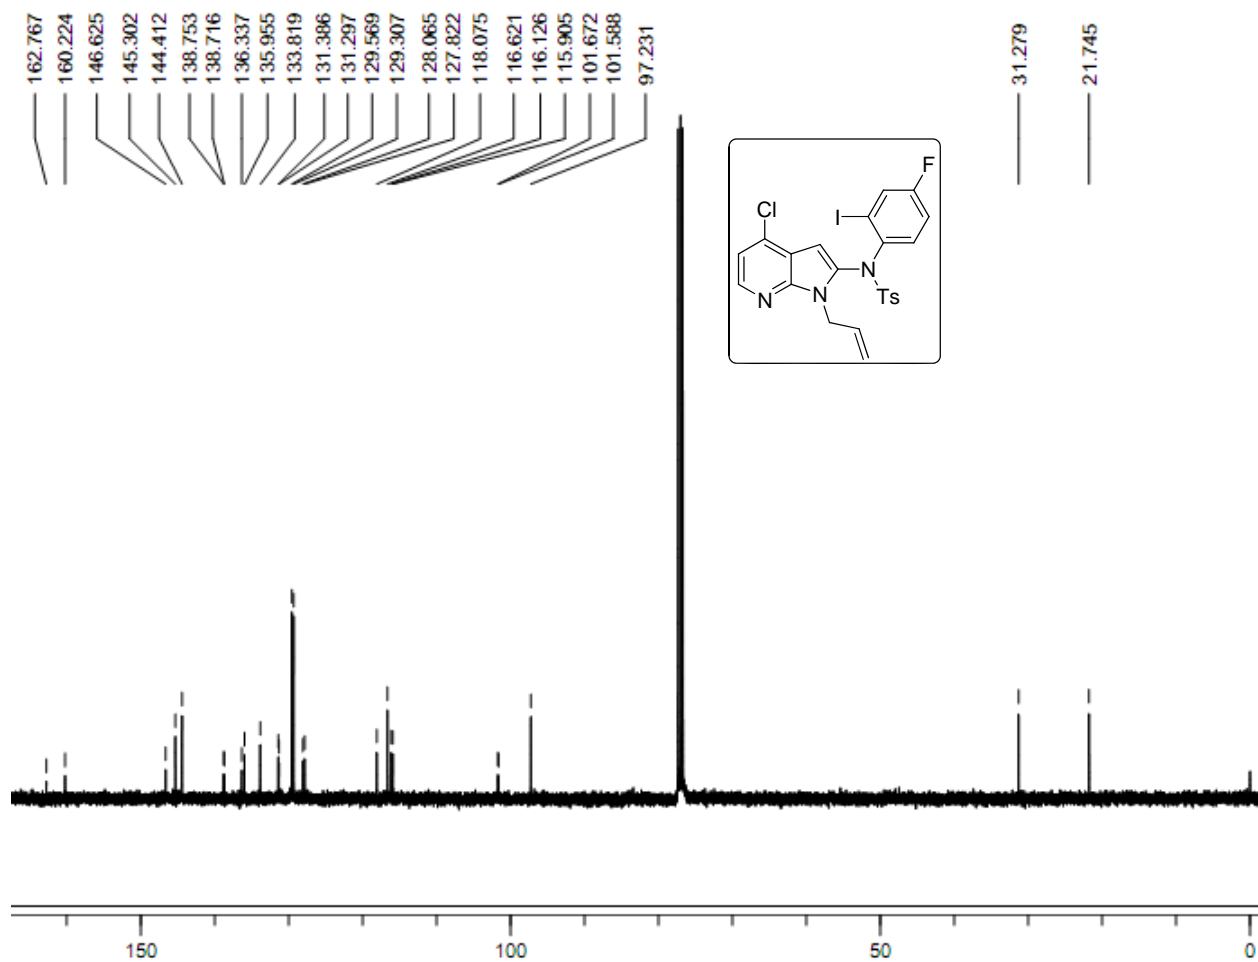

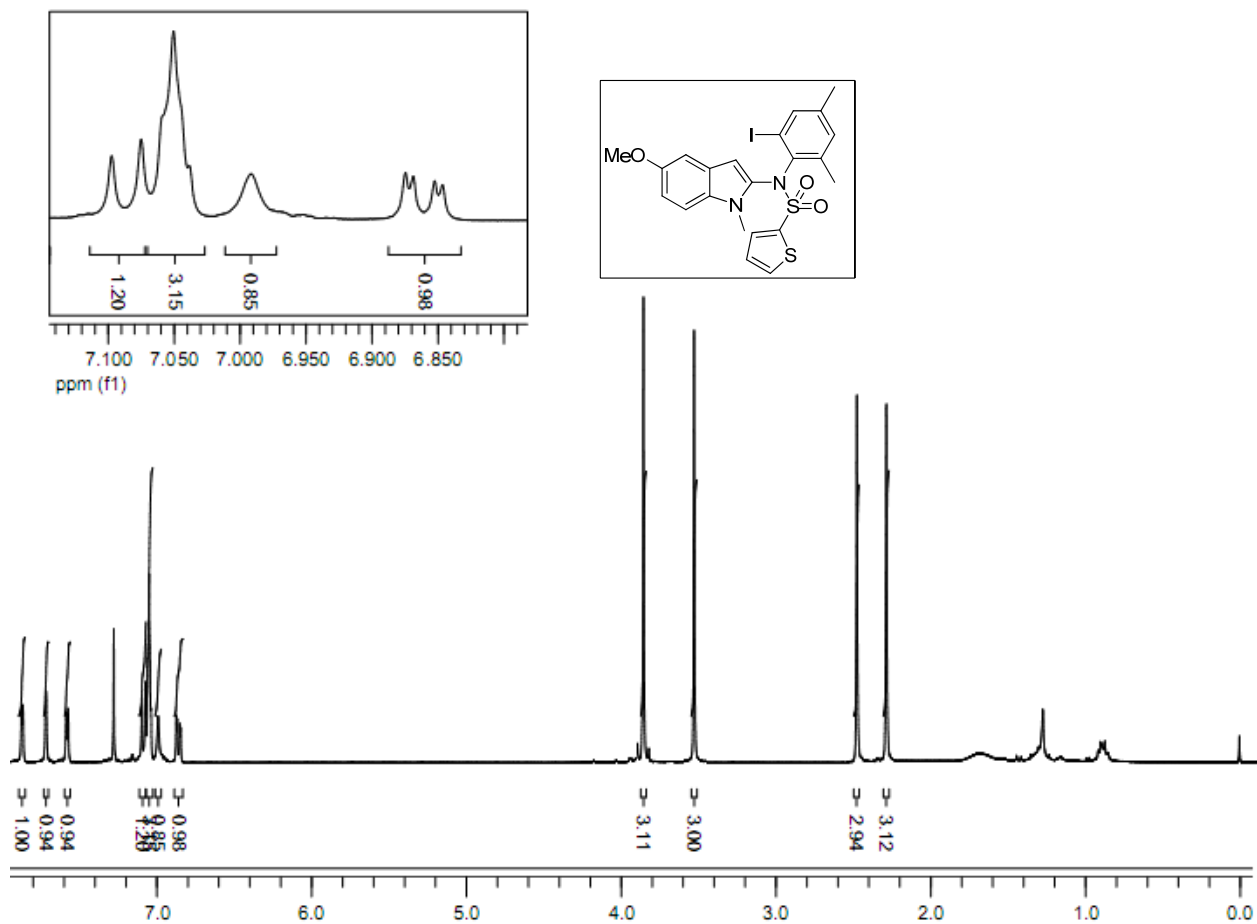

**3u**  $^1\text{H}$  NMR (400 MHz,  $\text{CDCl}_3$ )

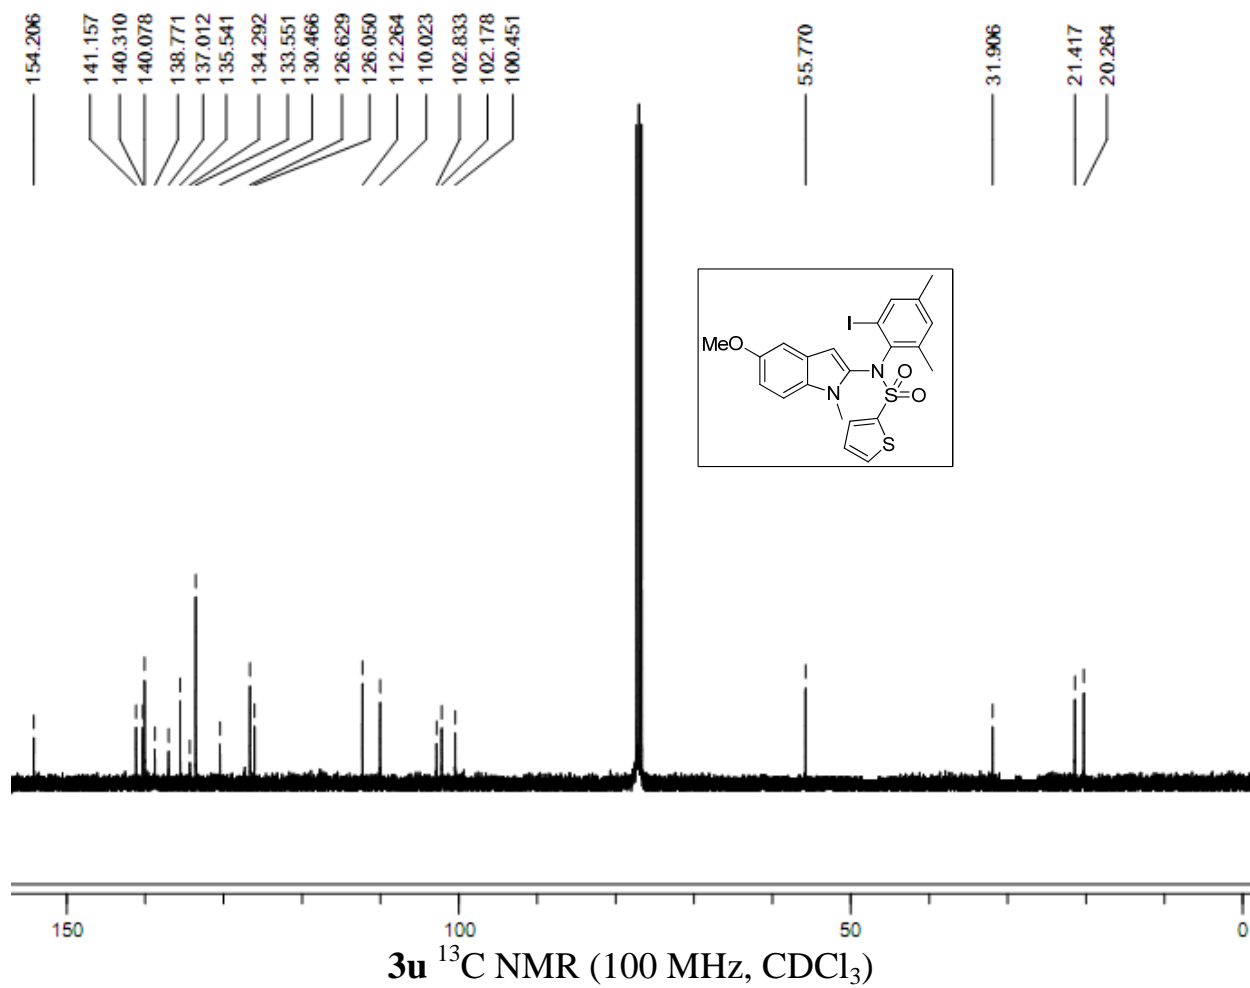

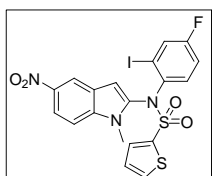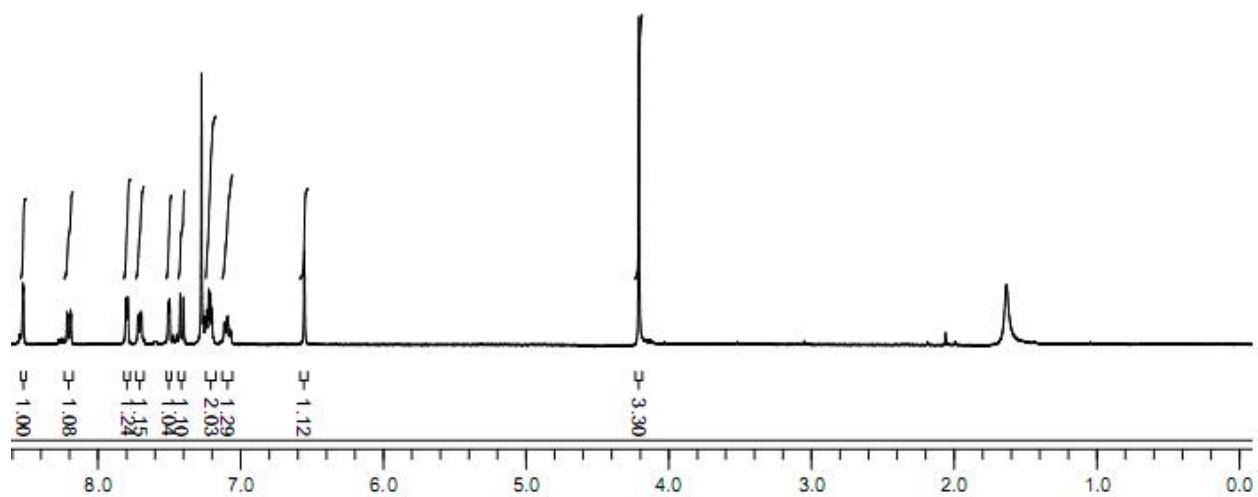

$^1\text{H}$  NMR (400 MHz,  $\text{CDCl}_3$ )

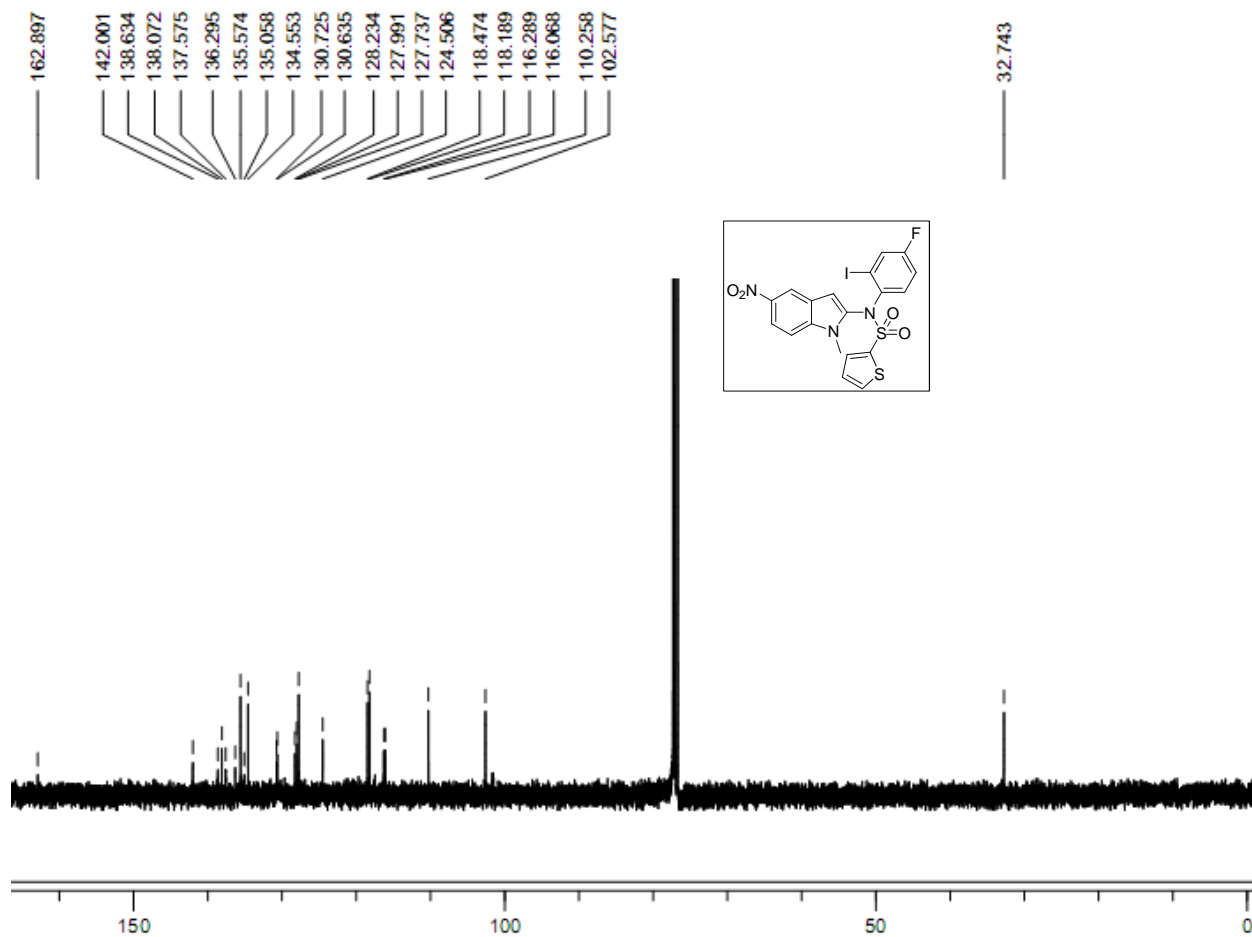

**3v**  $^{13}\text{C}$  NMR (100 MHz,  $\text{CDCl}_3$ )

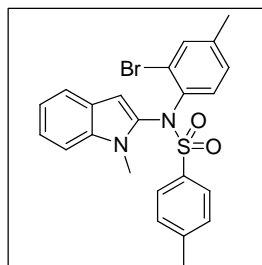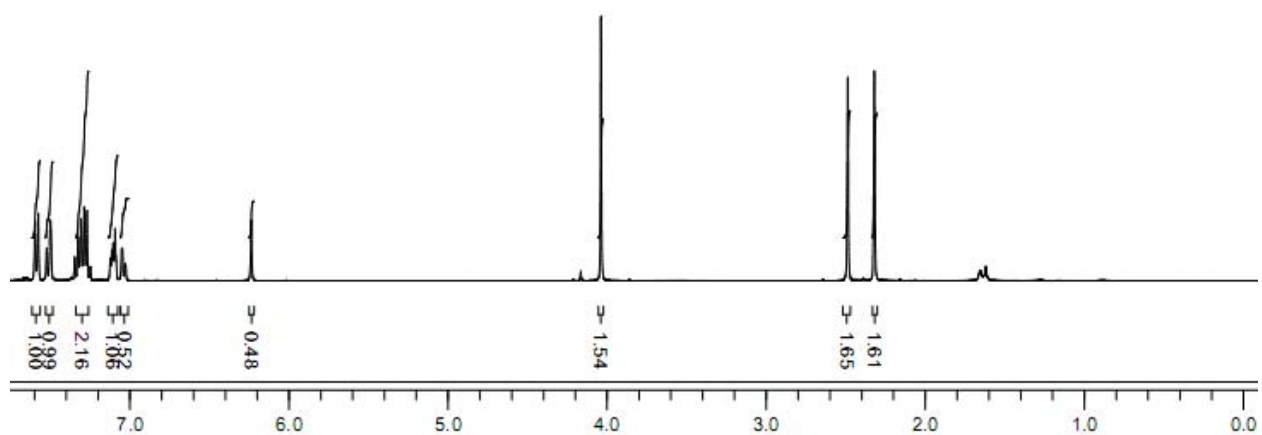

**3w**  $^1\text{H}$  NMR (400 MHz,  $\text{CDCl}_3$ )

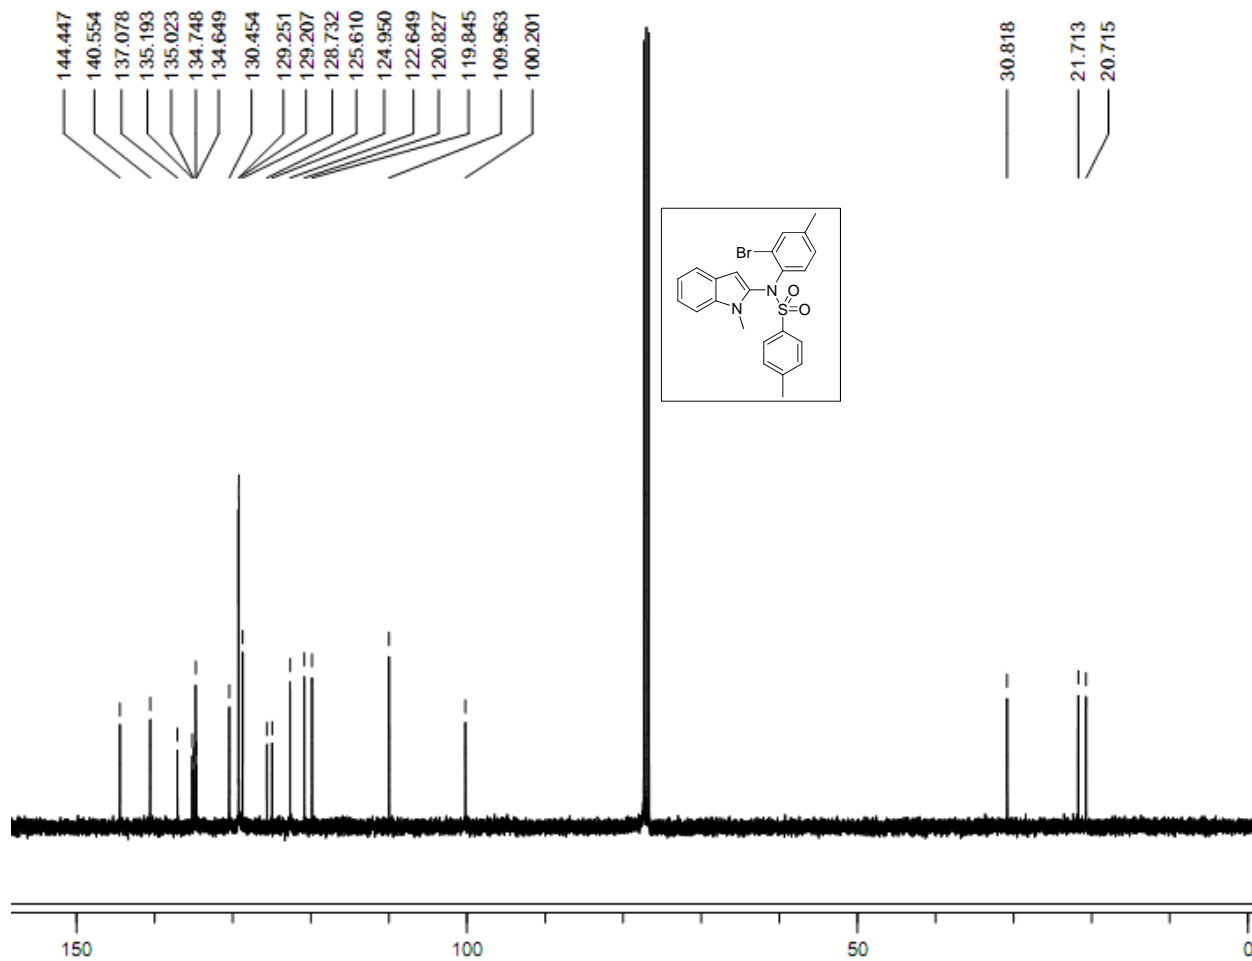

**3w**  $^{13}\text{C}$  NMR (100 MHz,  $\text{CDCl}_3$ )



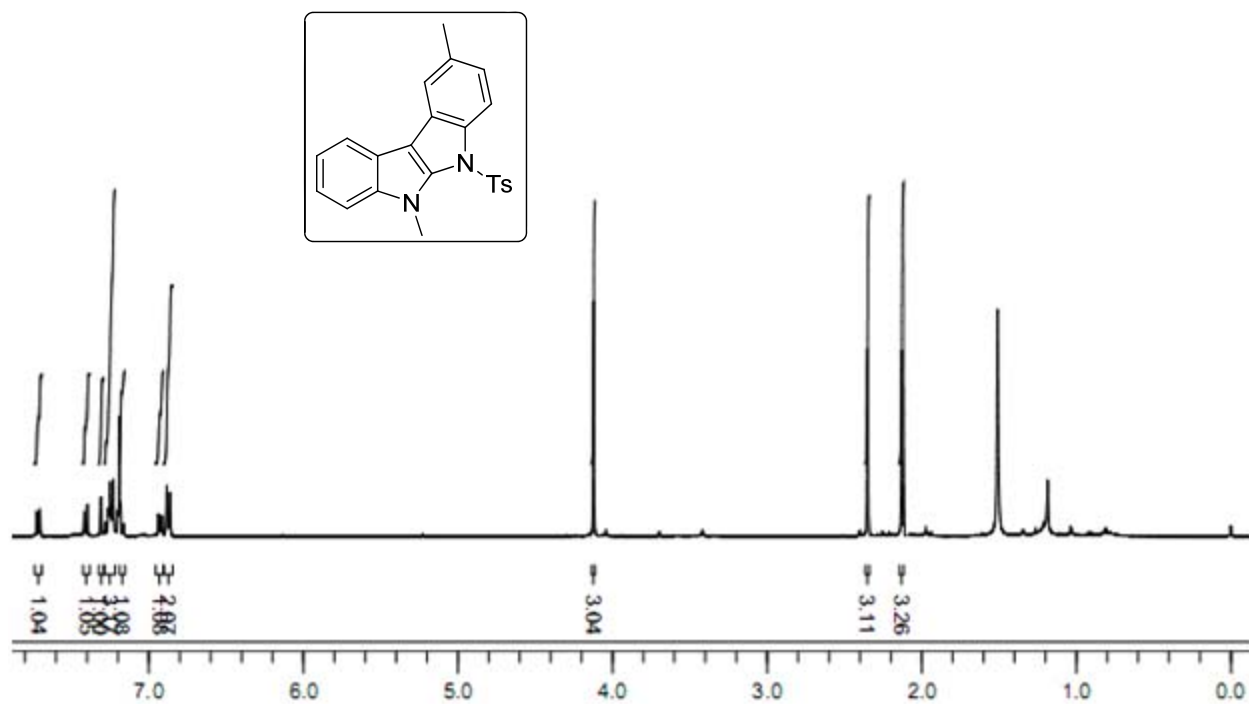

**4a** <sup>1</sup>H NMR (400 MHz, CDCl<sub>3</sub>)

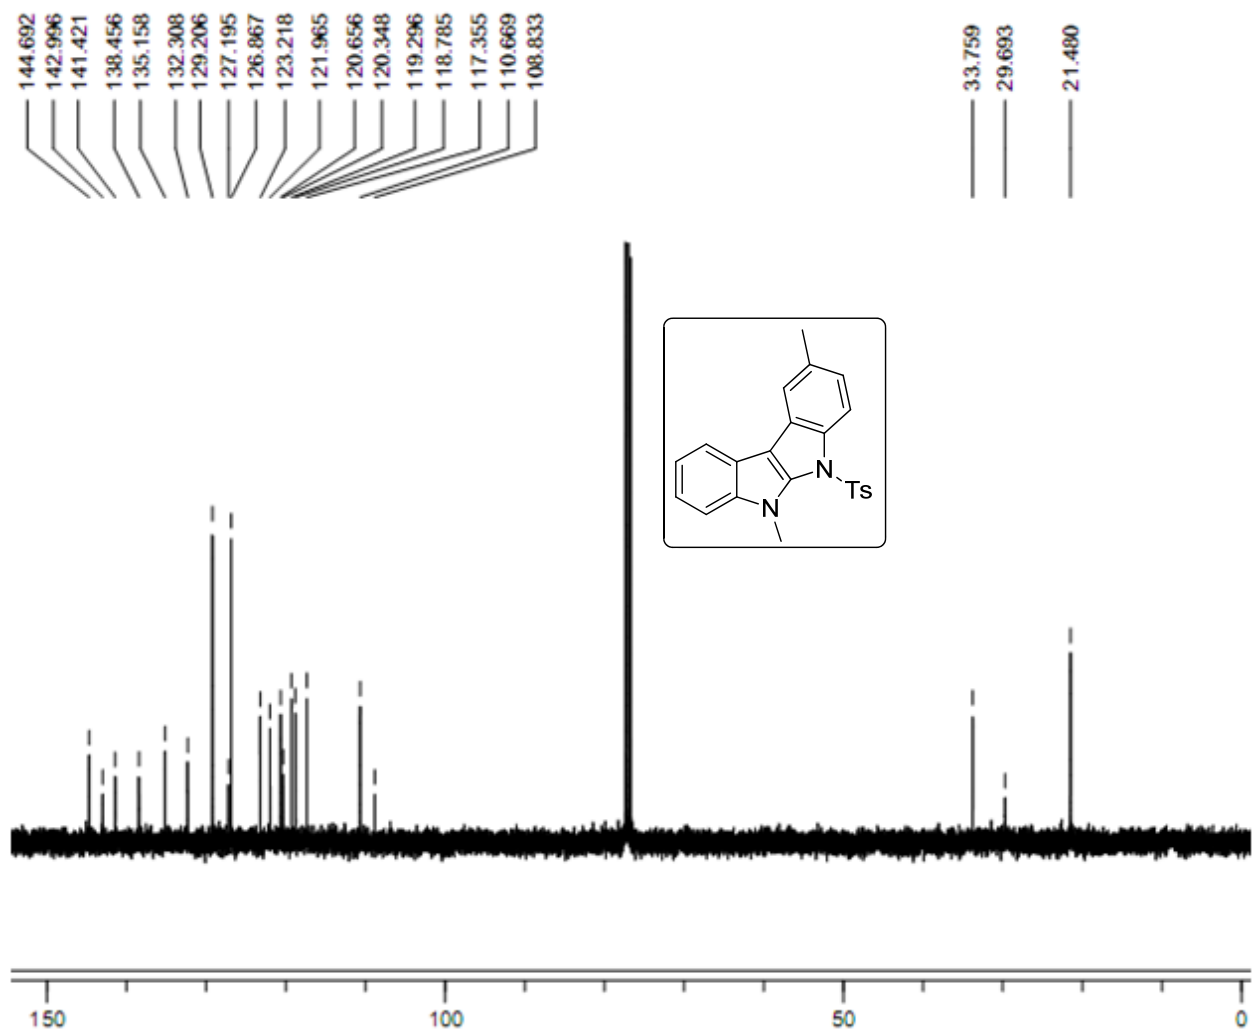

**4a**  $^{13}\text{C}$  NMR (100 MHz,  $\text{CDCl}_3$ )

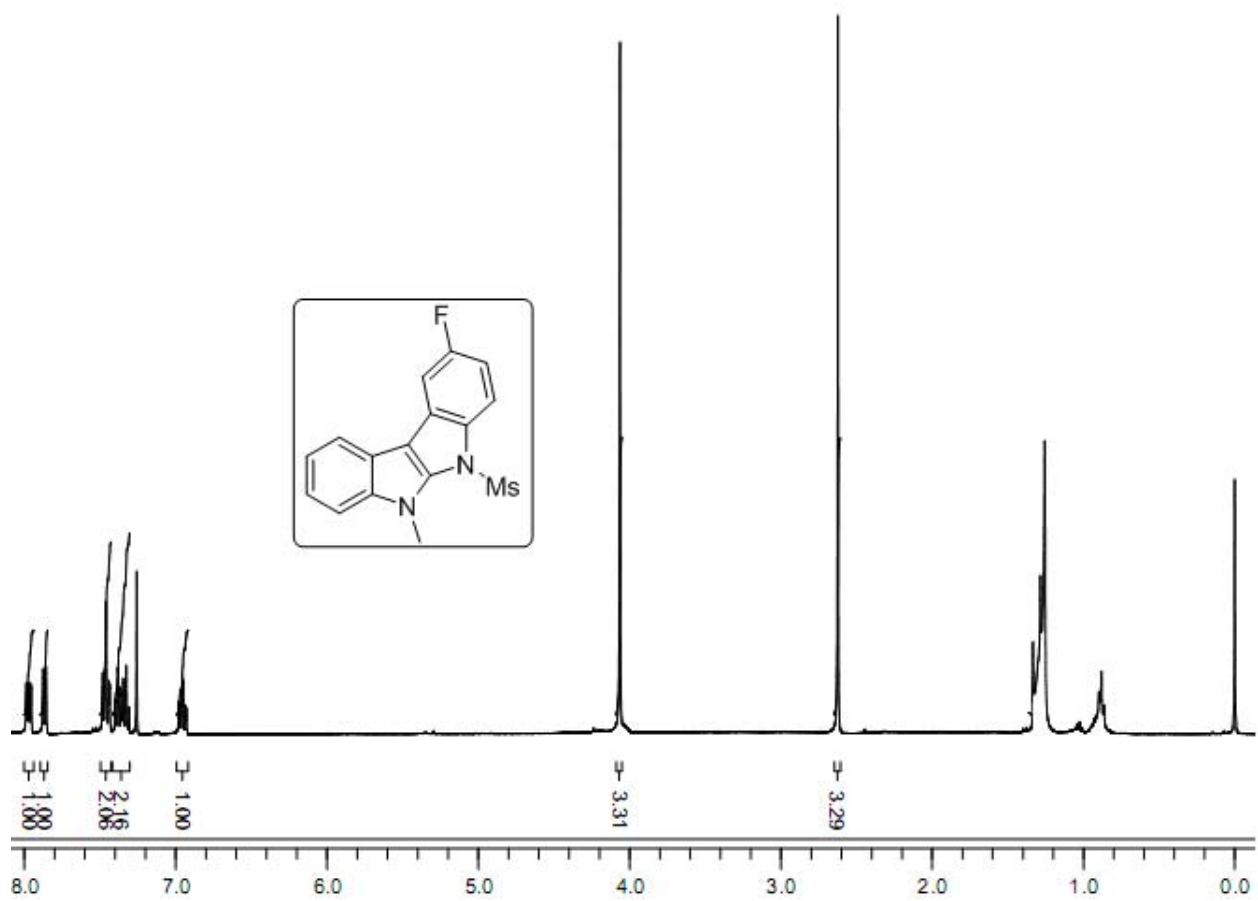

**4b**  $^1\text{H}$  NMR (400 MHz,  $\text{CDCl}_3$ )

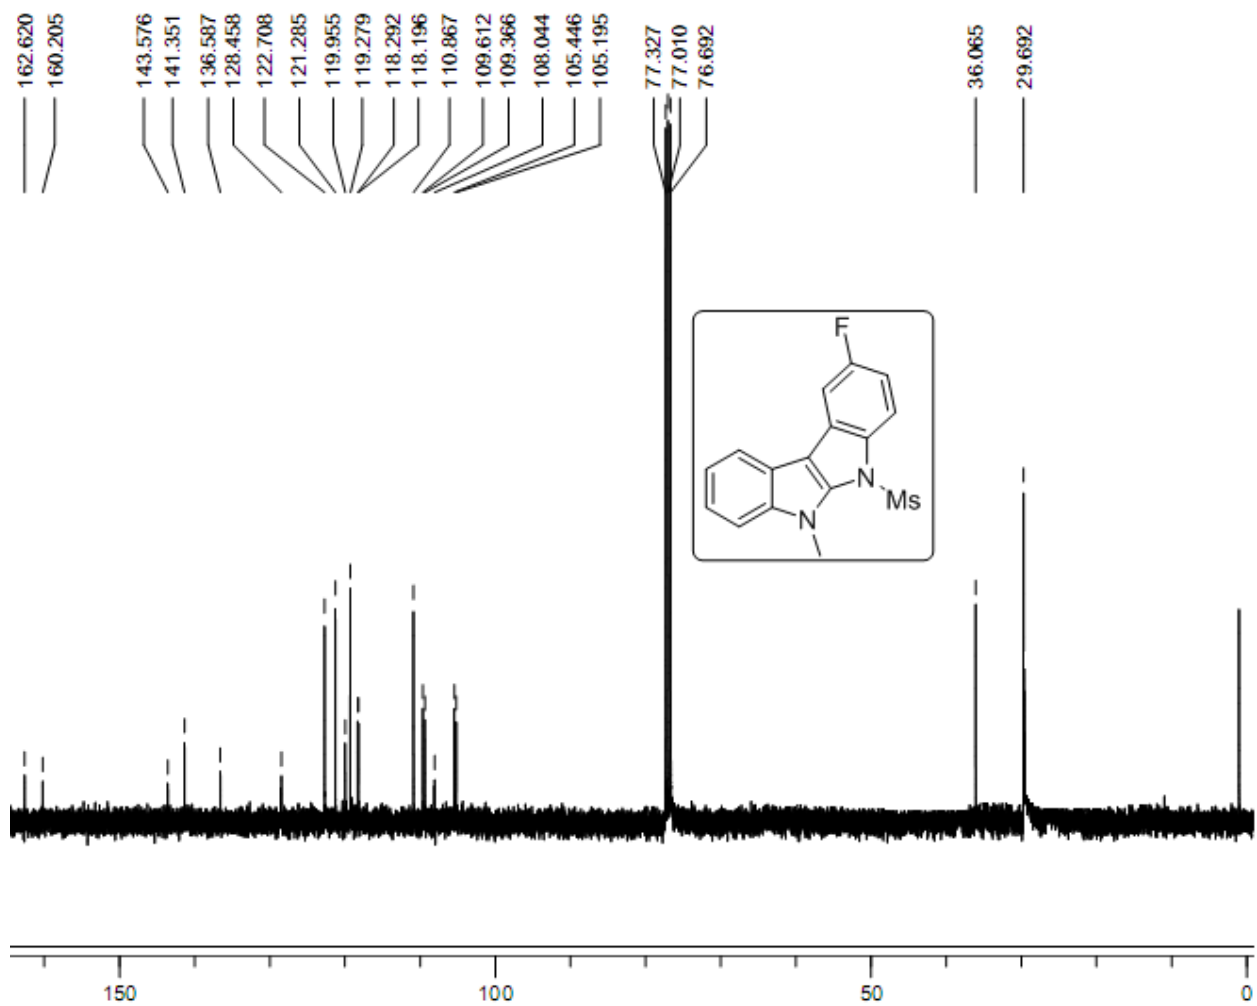

**4b**  $^{13}\text{C}$  NMR (100 MHz,  $\text{CDCl}_3$ )

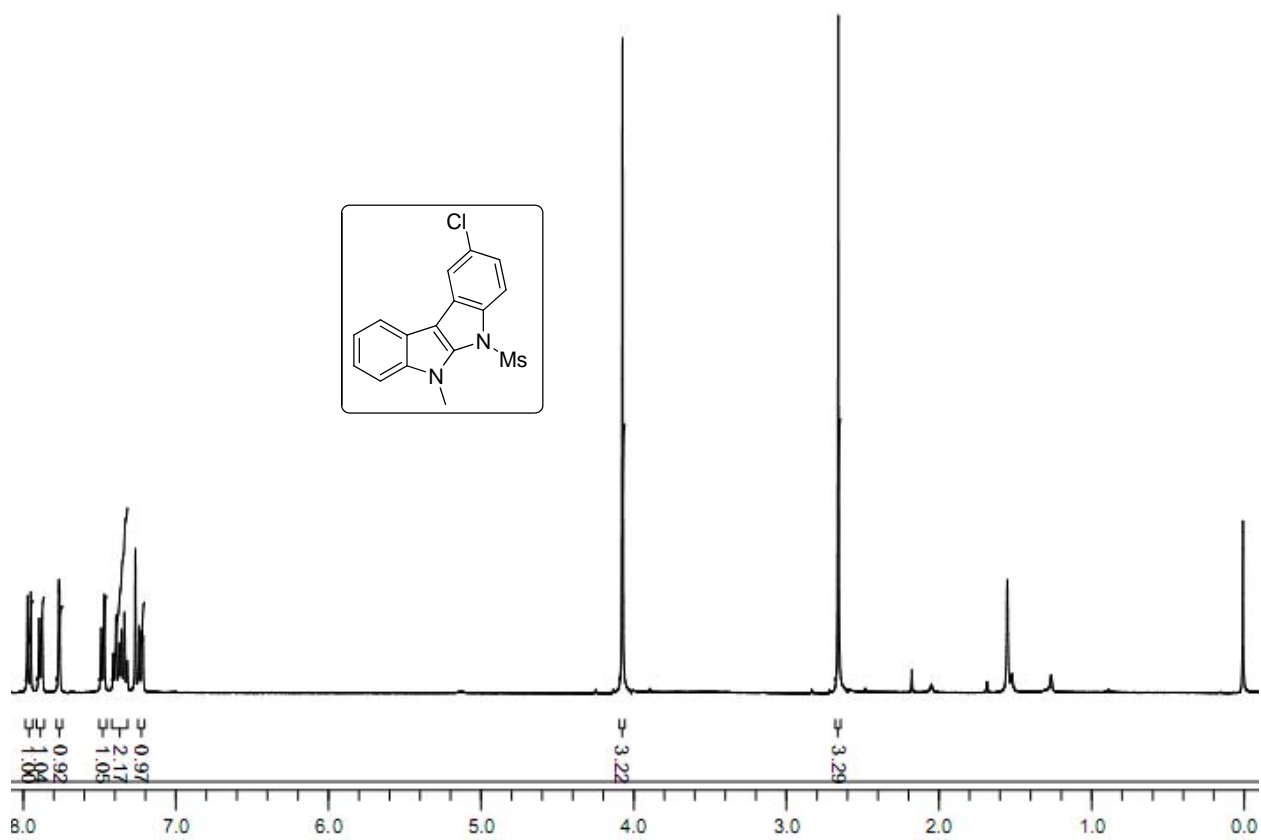

**4c**  $^1\text{H}$  NMR (400 MHz,  $\text{CDCl}_3$ )

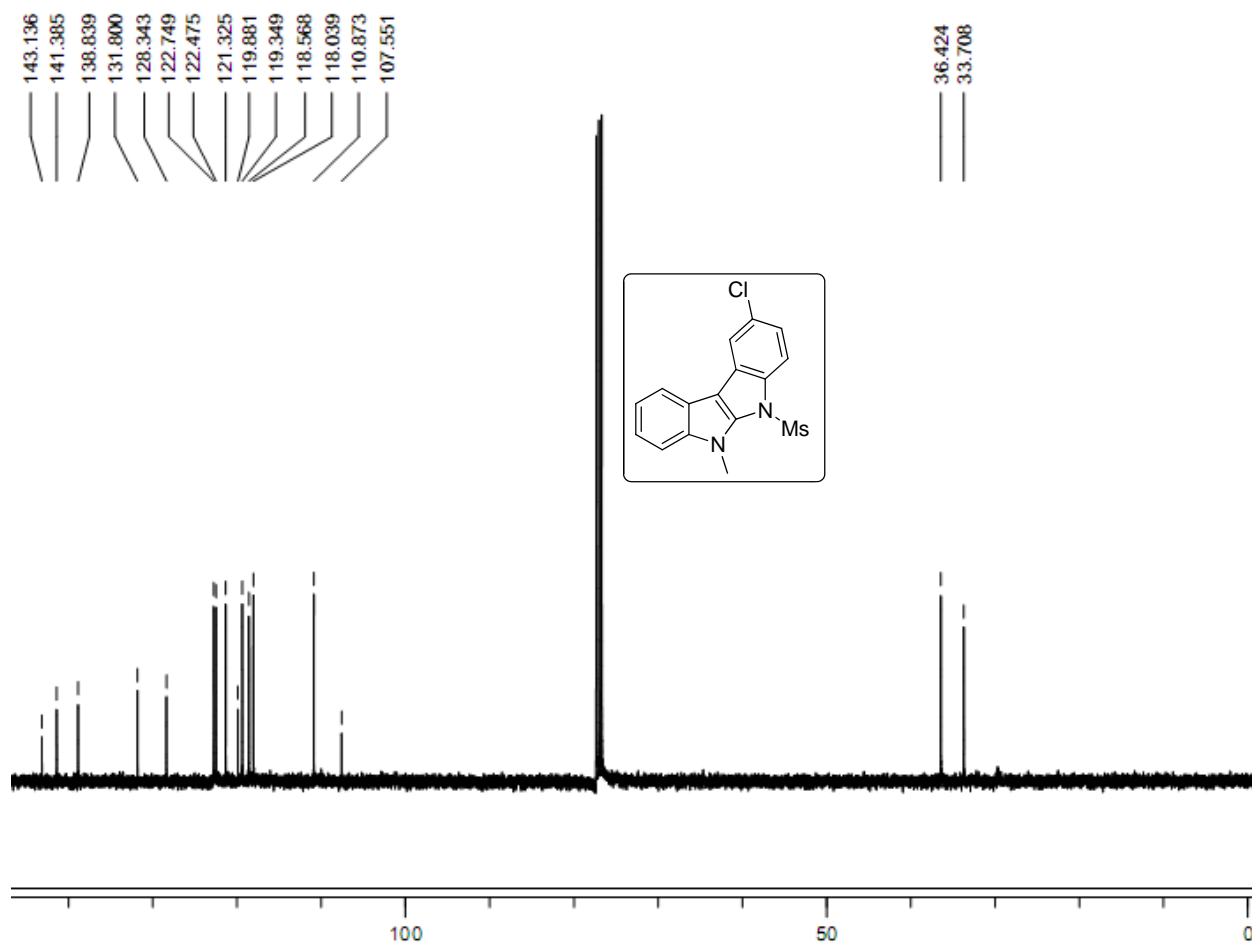

**4c**  $^1\text{H}$  NMR (400 MHz,  $\text{CDCl}_3$ )

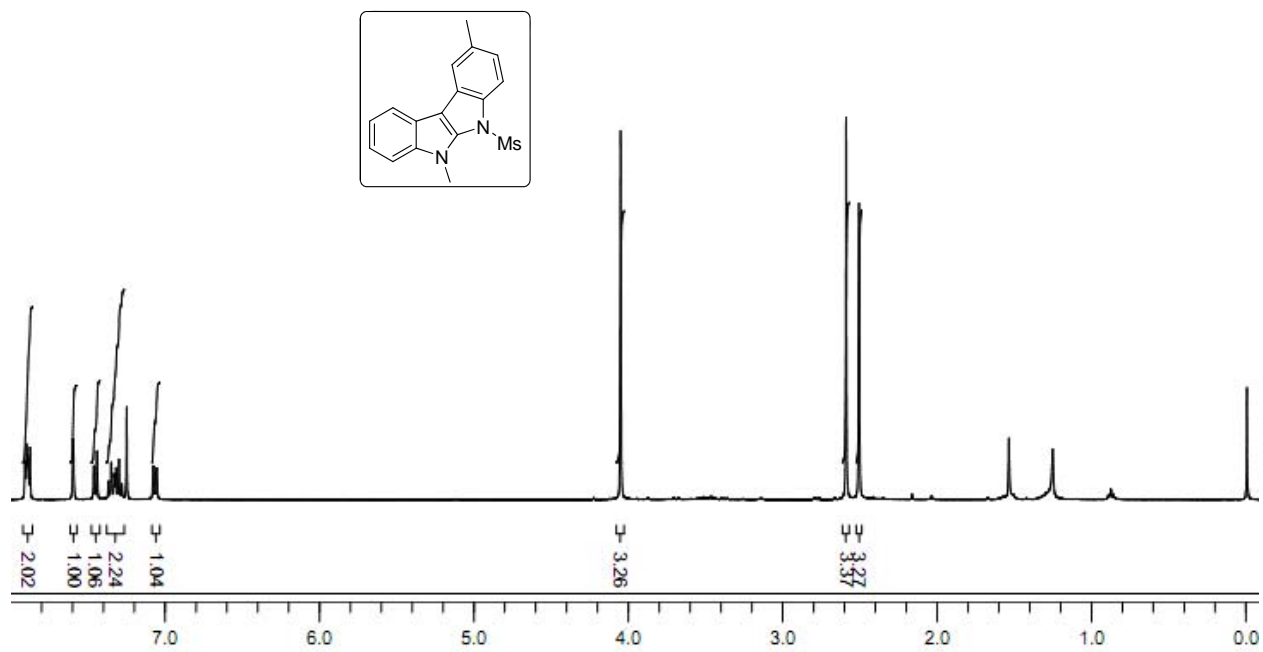

**4d** <sup>1</sup>H NMR (400 MHz, CDCl<sub>3</sub>)

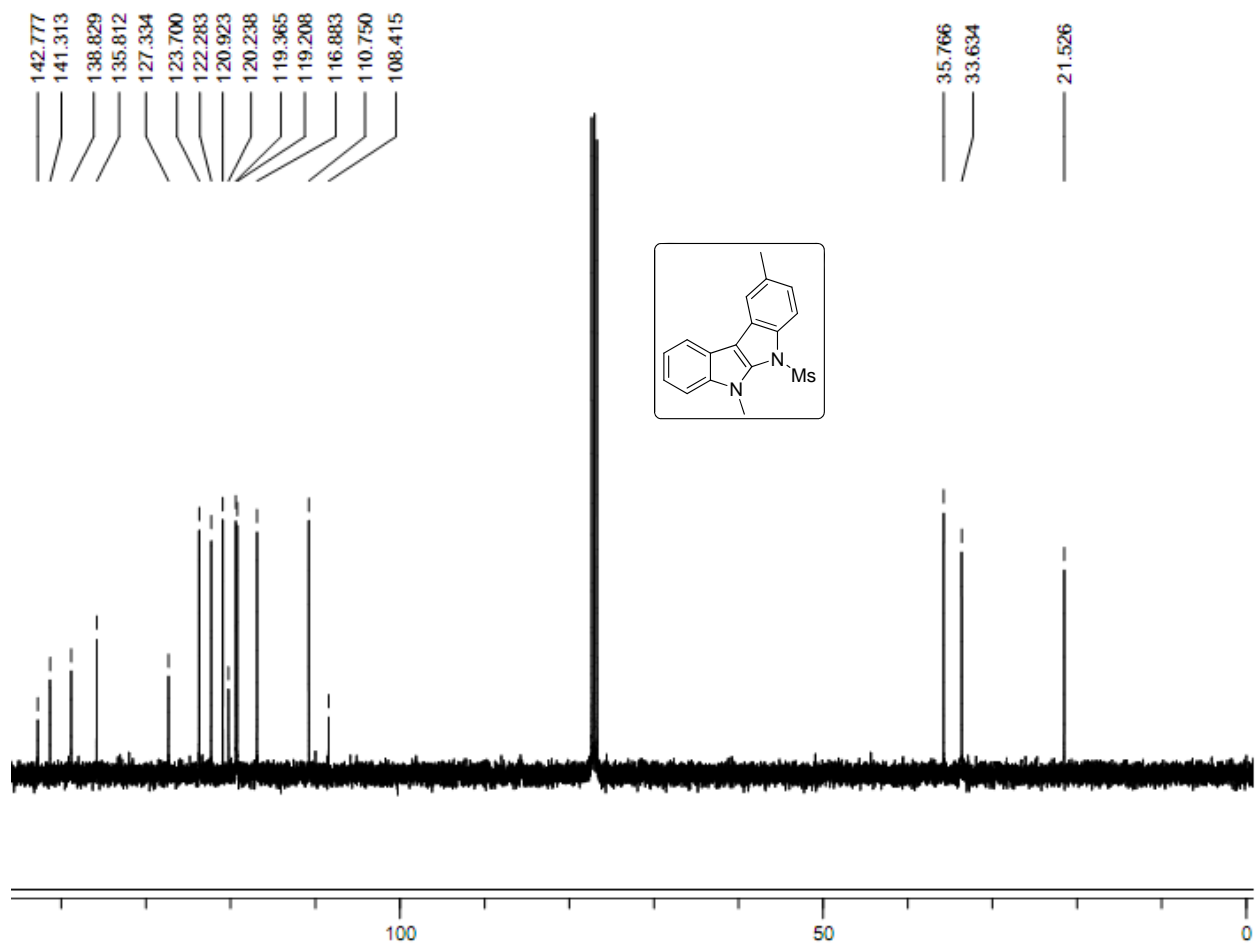

**4d**  $^{13}\text{C}$  NMR (100 MHz,  $\text{CDCl}_3$ )



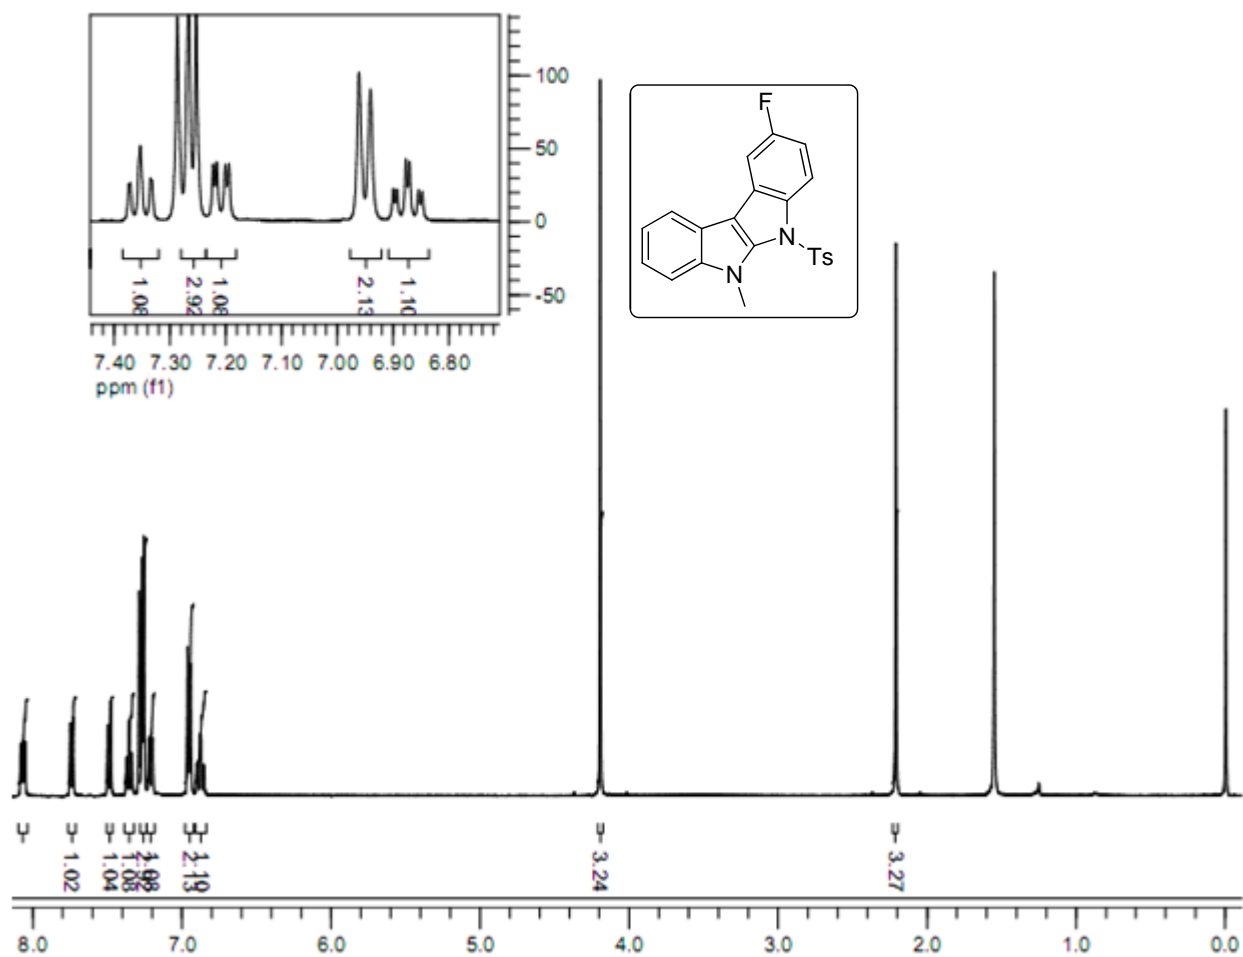

**4e**  $^1\text{H}$  NMR (400 MHz,  $\text{CDCl}_3$ )

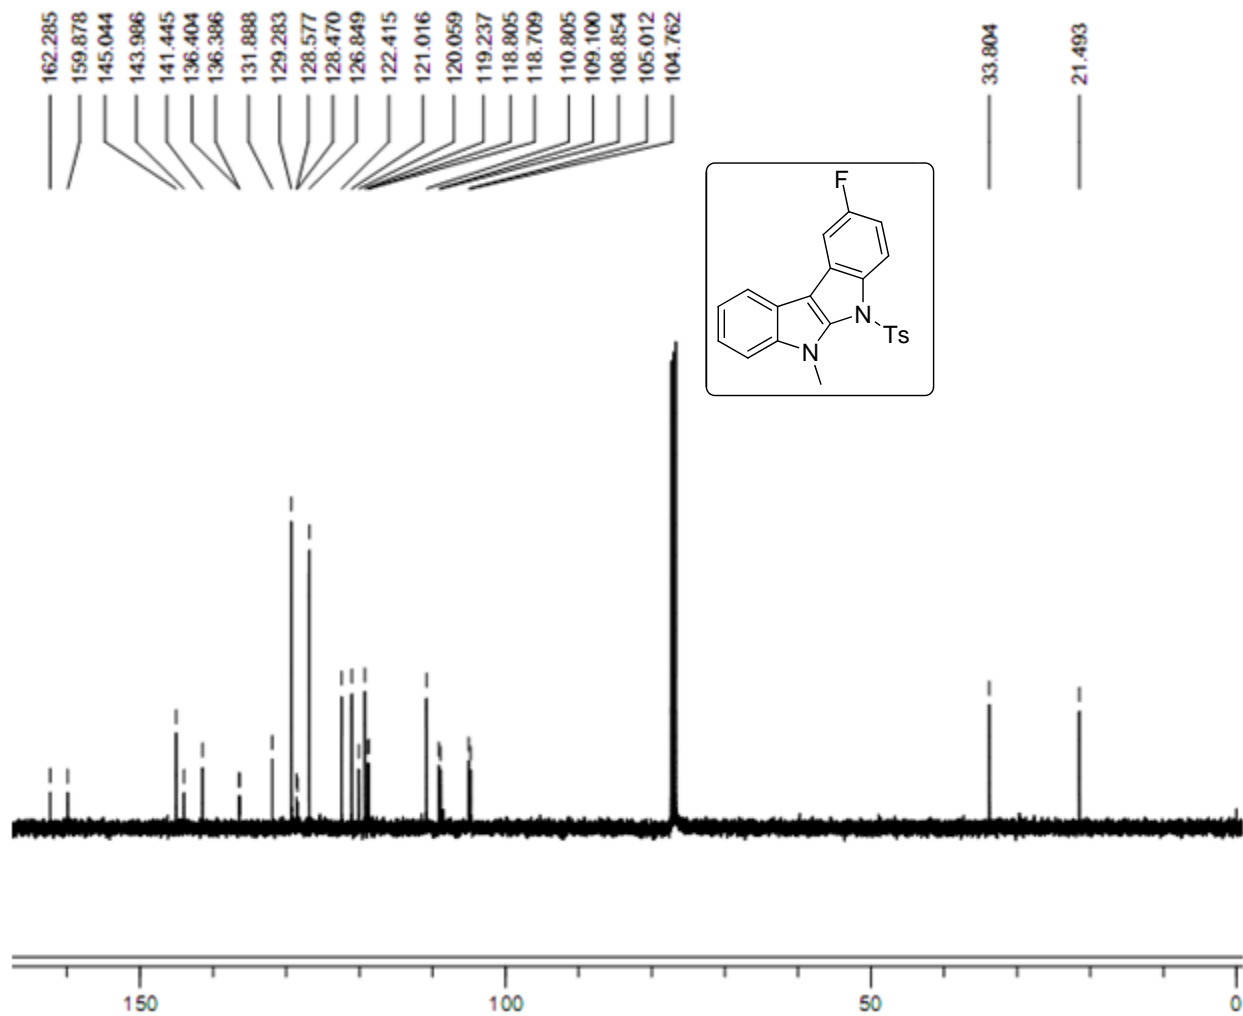

**4e**  $^{13}\text{C}$  NMR (100 MHz,  $\text{CDCl}_3$ )

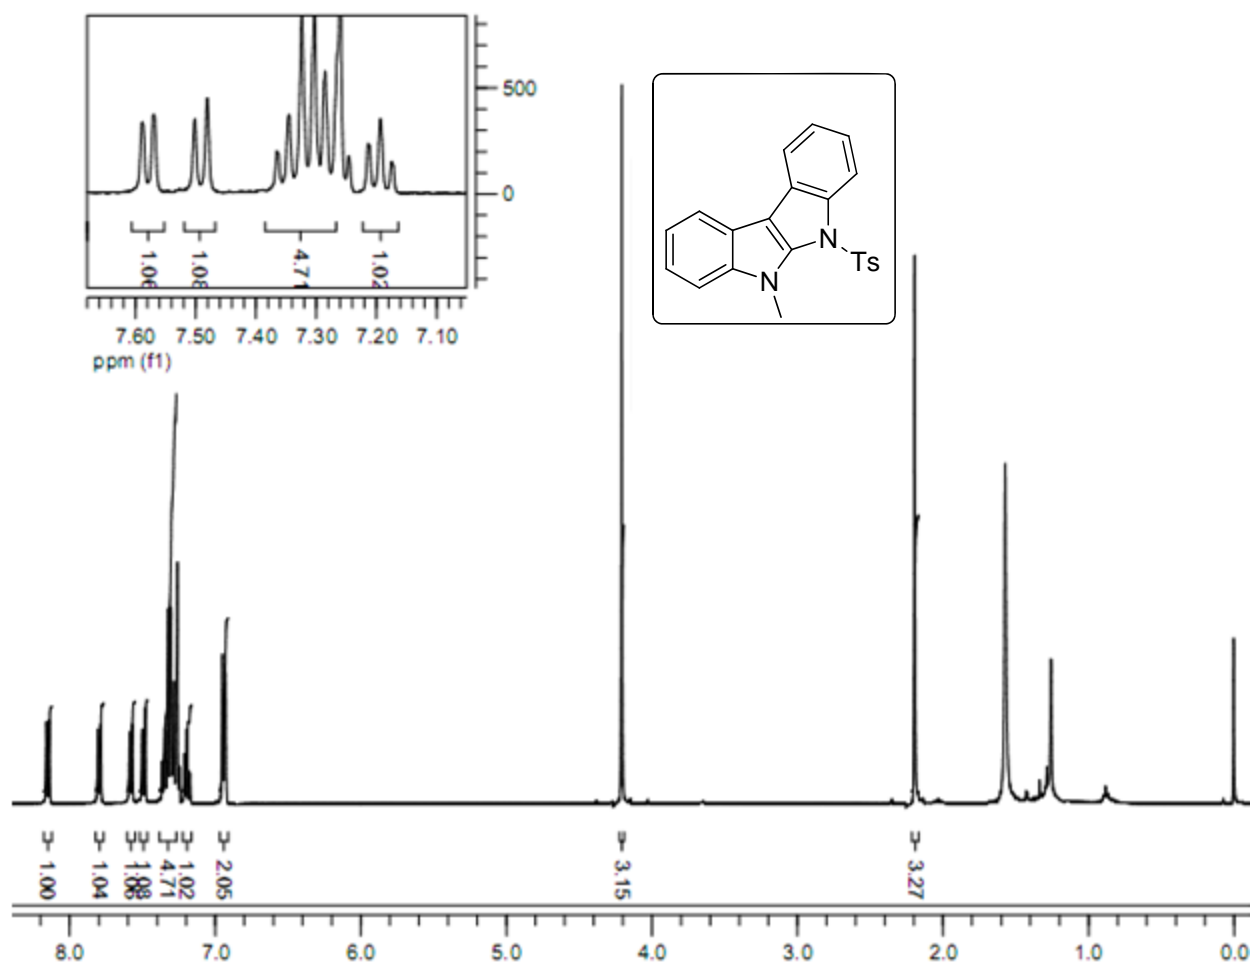

**4f**  $^1\text{H}$  NMR (400 MHz,  $\text{CDCl}_3$ )

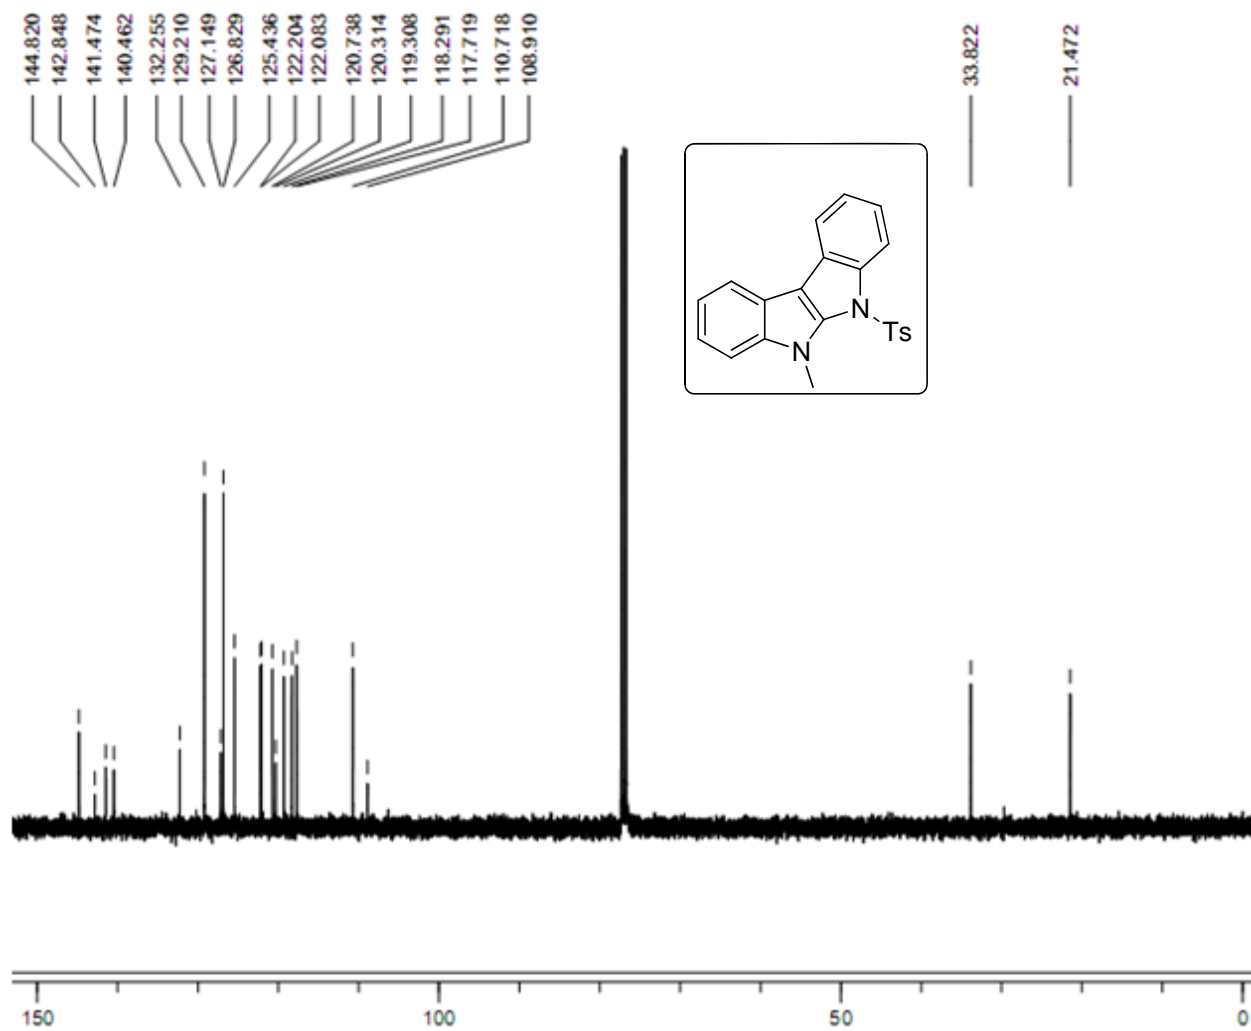

**4f**  $^{13}\text{C}$  NMR (100 MHz,  $\text{CDCl}_3$ )

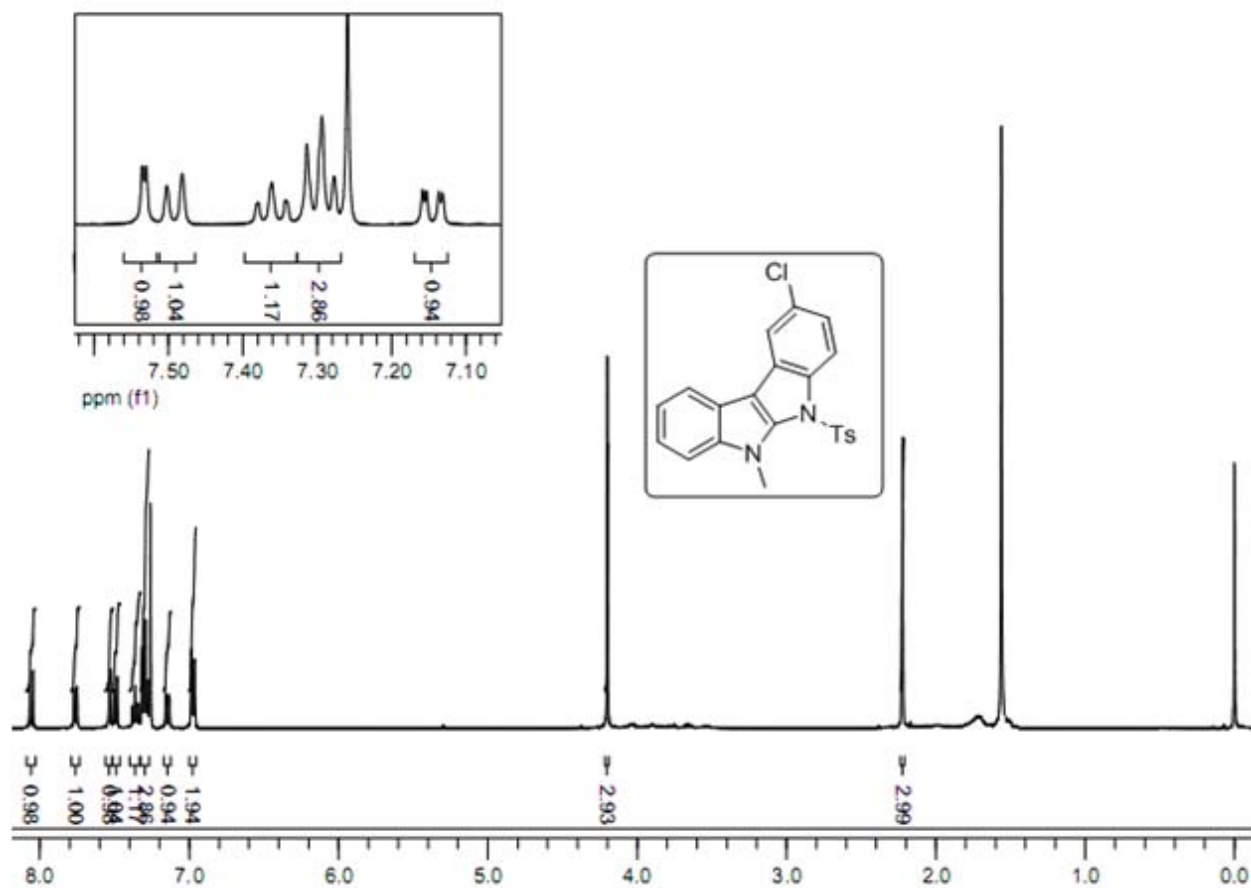

**4g**  $^1\text{H}$  NMR (400 MHz,  $\text{CDCl}_3$ )

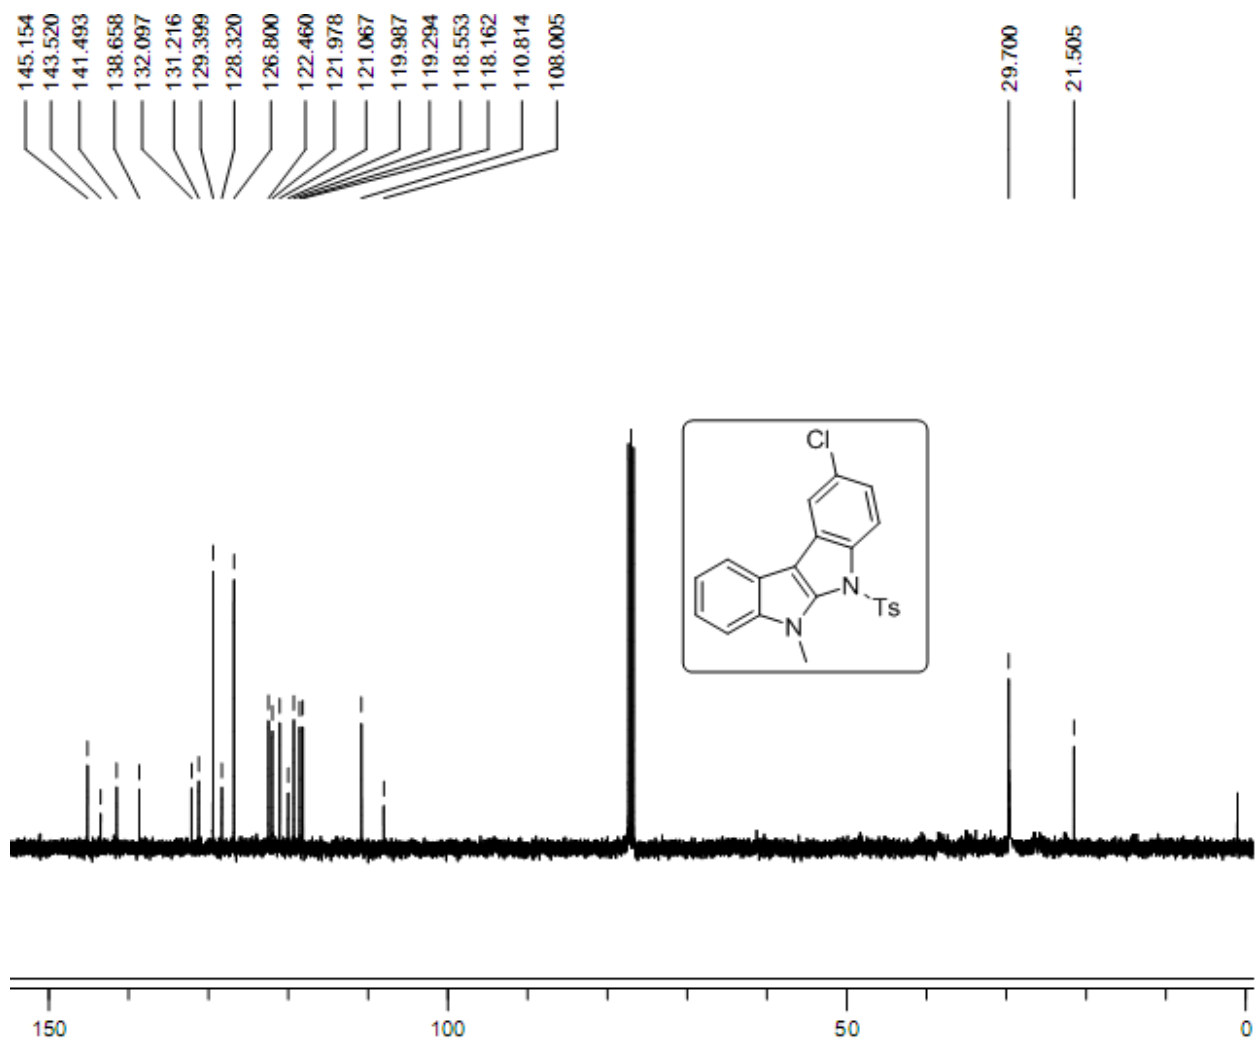

**4g**  $^{13}\text{C}$  NMR (100 MHz,  $\text{CDCl}_3$ )

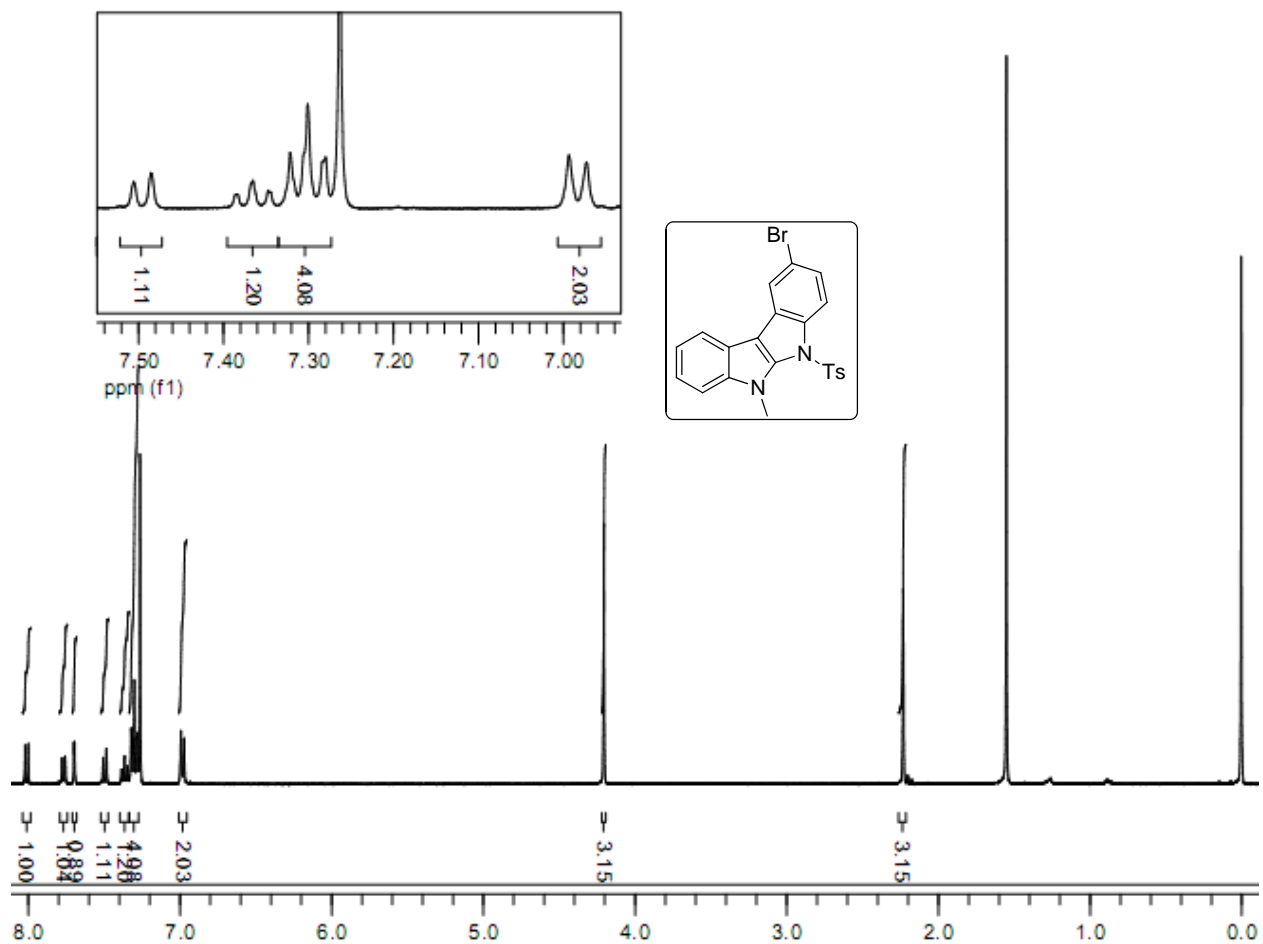

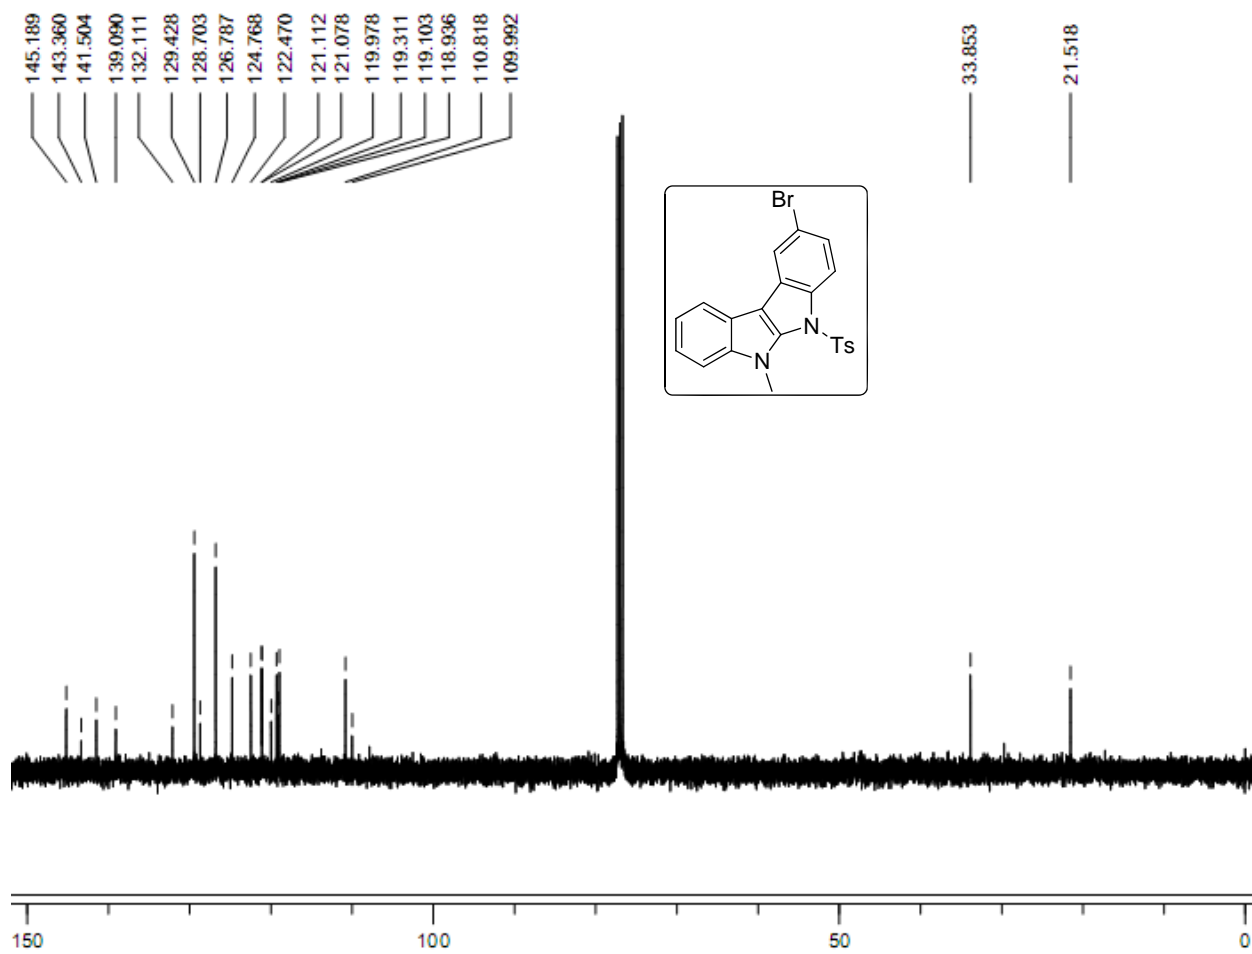

**4h**  $^{13}\text{C}$  NMR (100 MHz,  $\text{CDCl}_3$ )



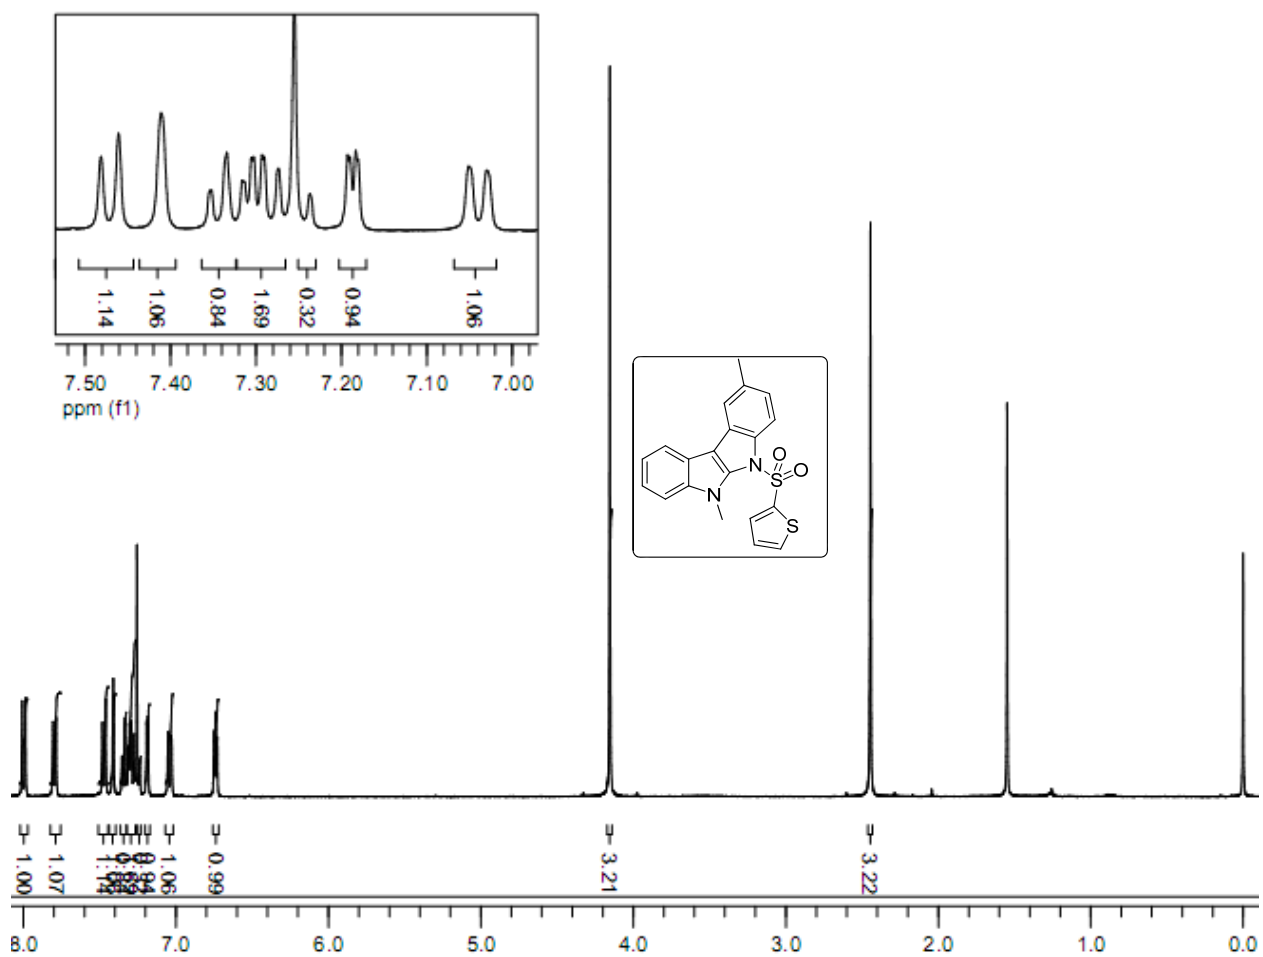

**4i**  $^1\text{H}$  NMR (400 MHz,  $\text{CDCl}_3$ )

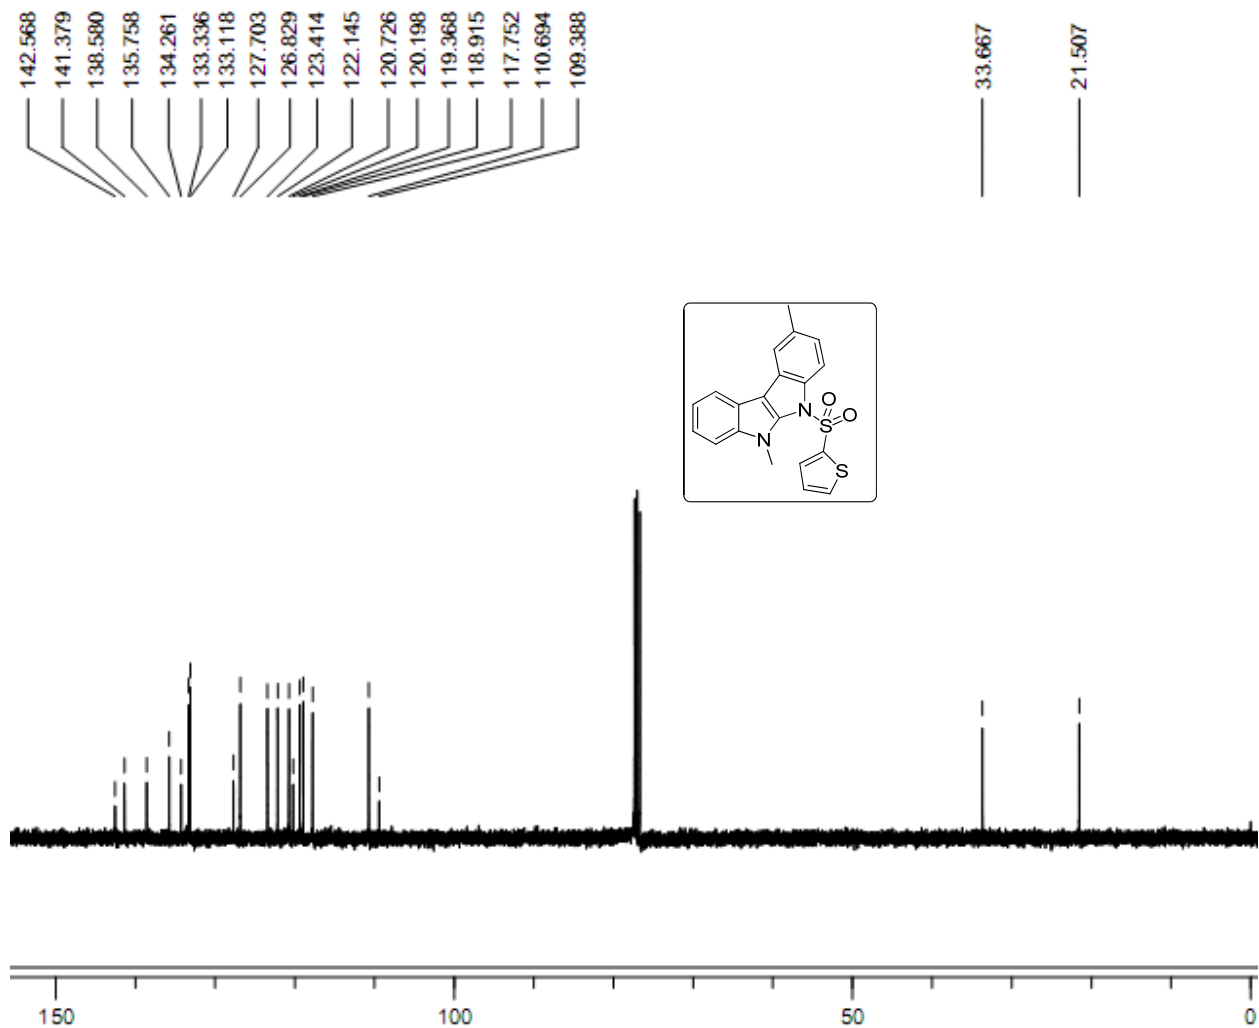

**4i**  $^{13}\text{C}$  NMR (100 MHz,  $\text{CDCl}_3$ )

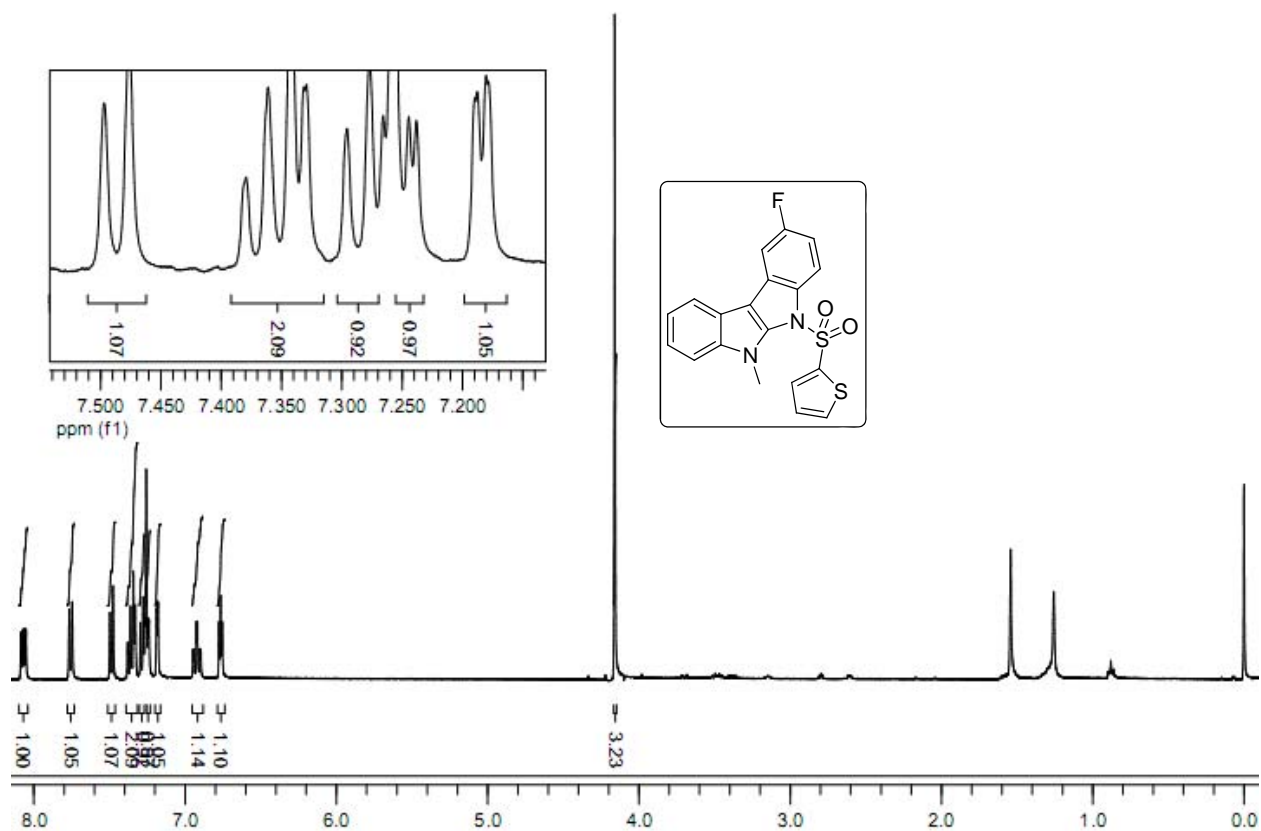

**4j**  $^1\text{H}$  NMR (400 MHz,  $\text{CDCl}_3$ )

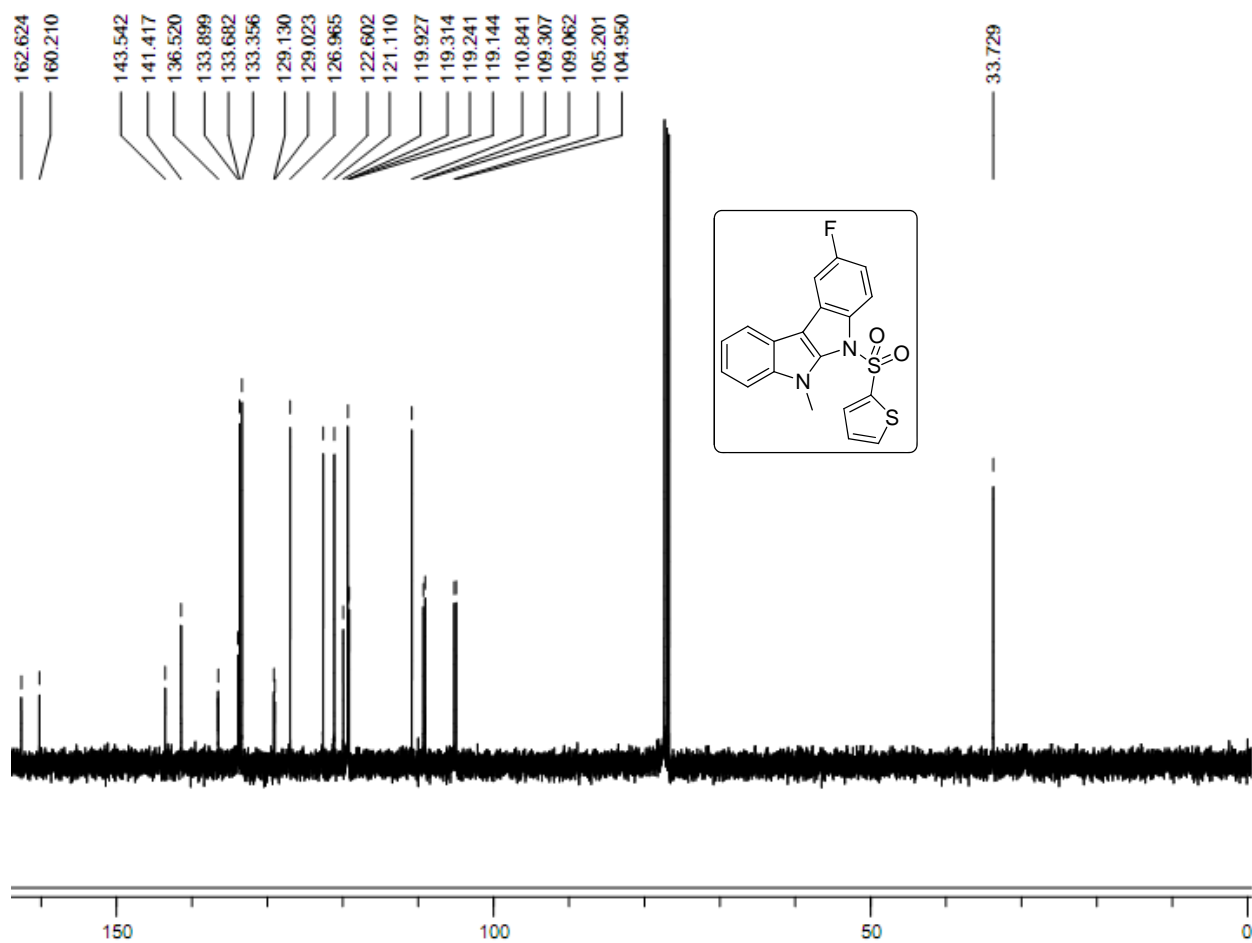

**4j**  $^{13}\text{C}$  NMR (100 MHz,  $\text{CDCl}_3$ )

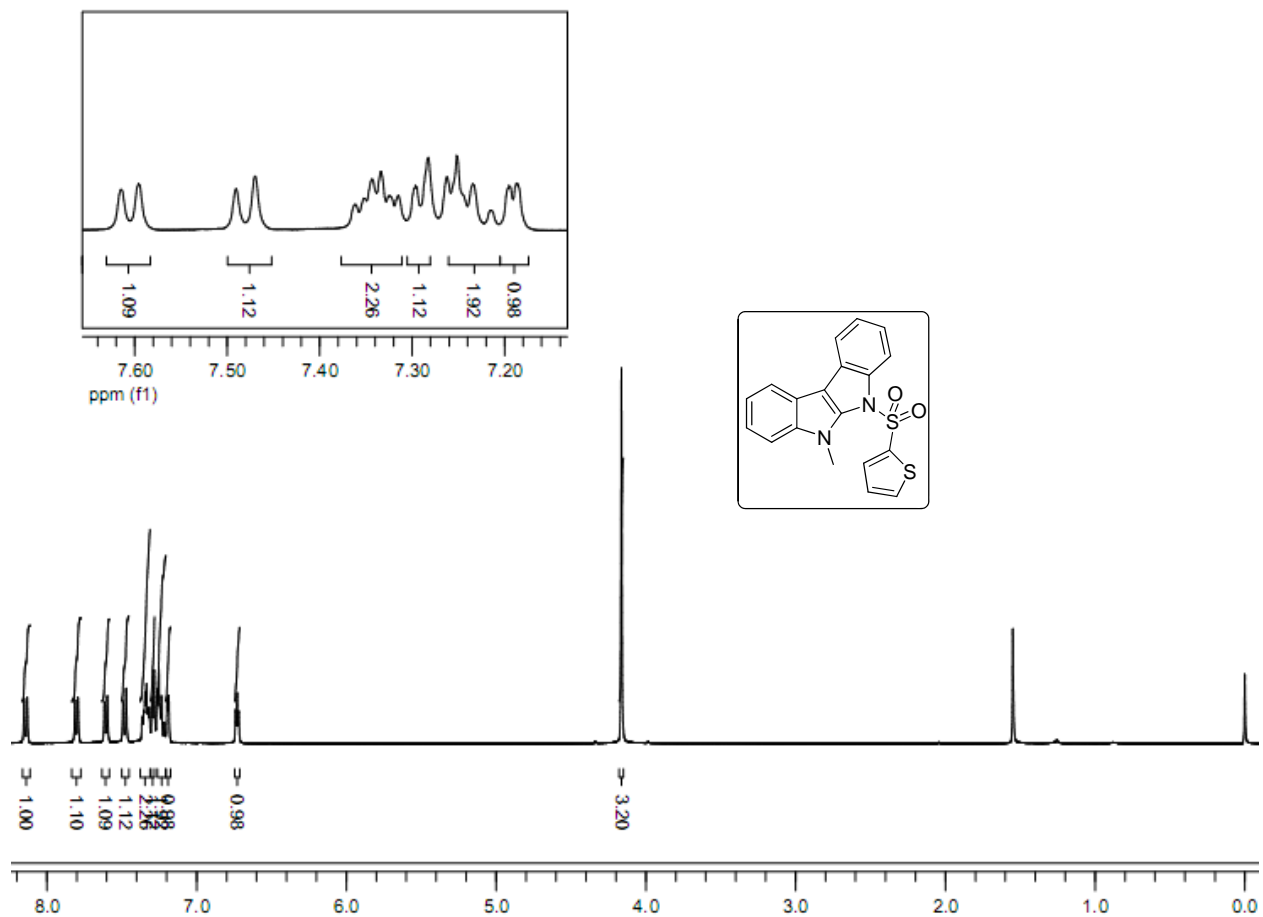

**4k**  $^1\text{H}$  NMR (400 MHz,  $\text{CDCl}_3$ )

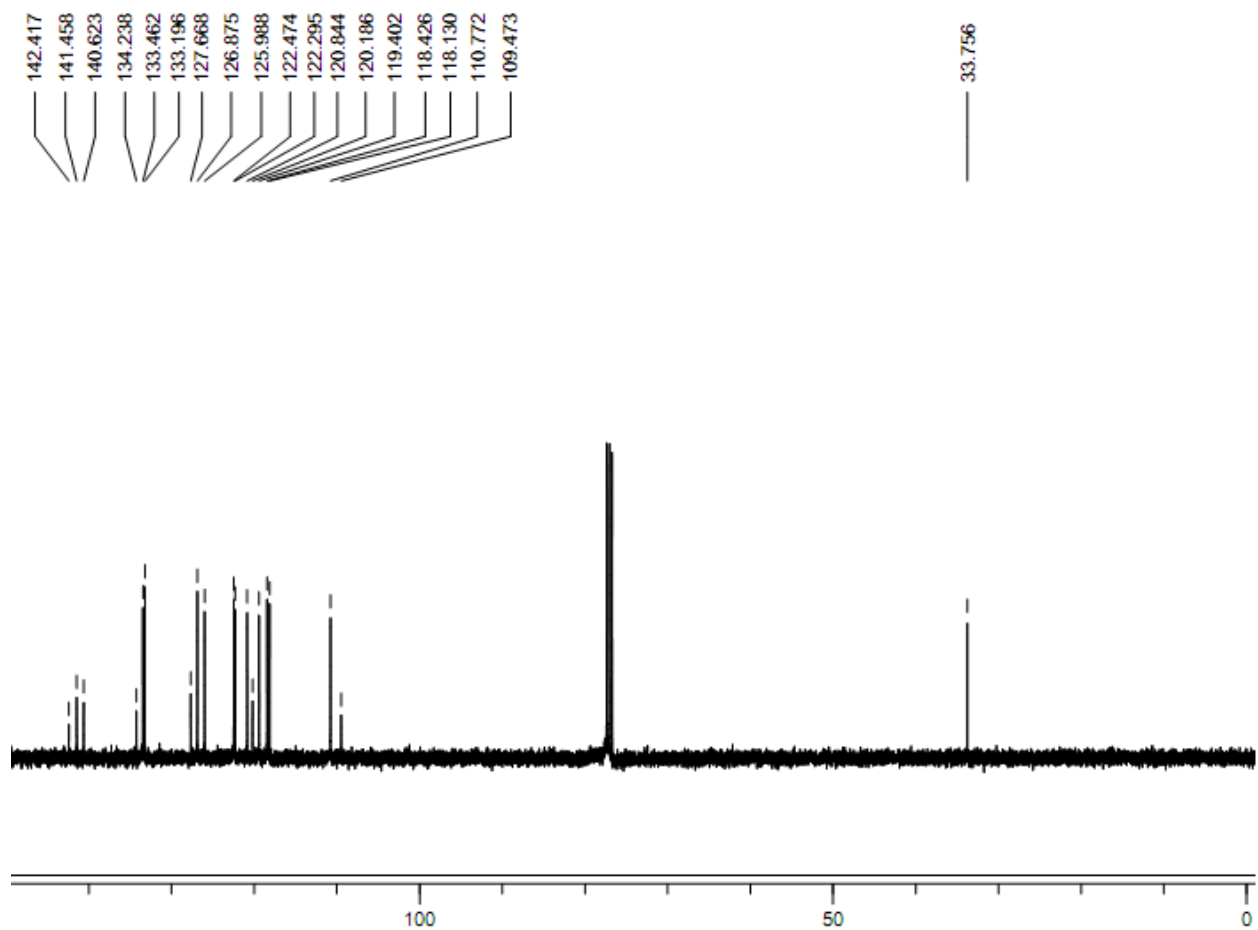

**4k**  $^{13}\text{C}$  NMR (100 MHz,  $\text{CDCl}_3$ )

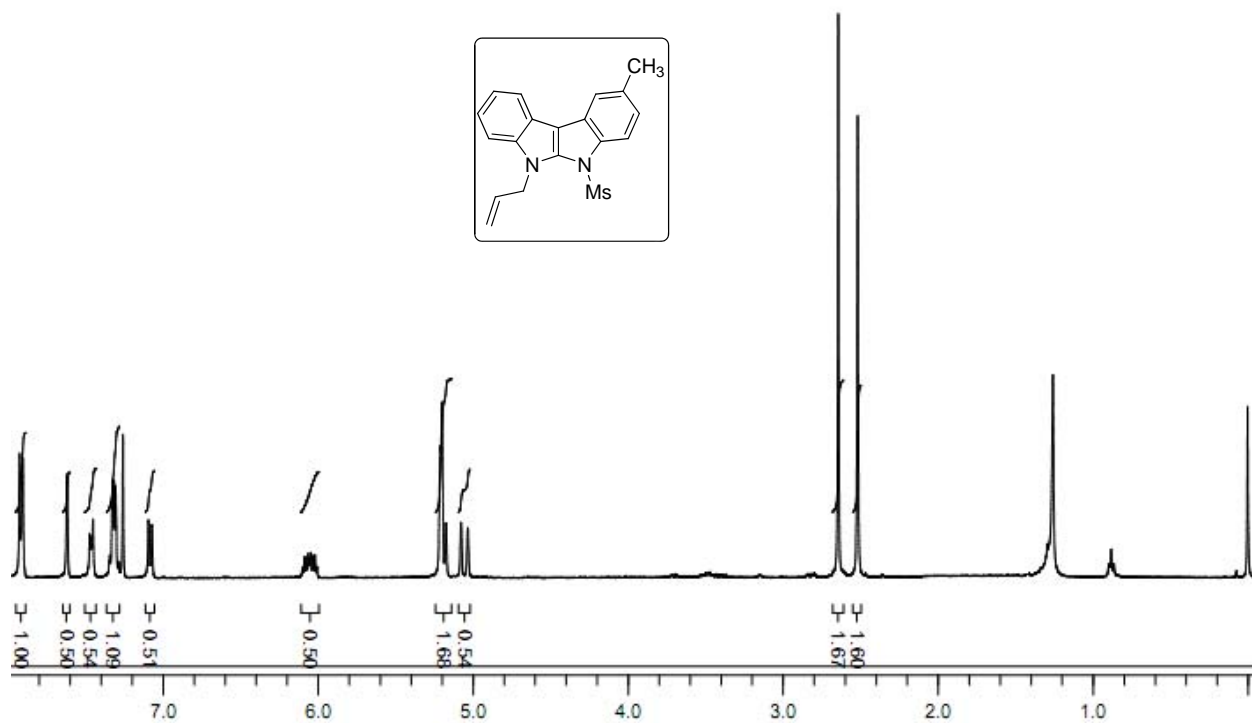

**41** <sup>1</sup>H NMR (400 MHz, CDCl<sub>3</sub>)

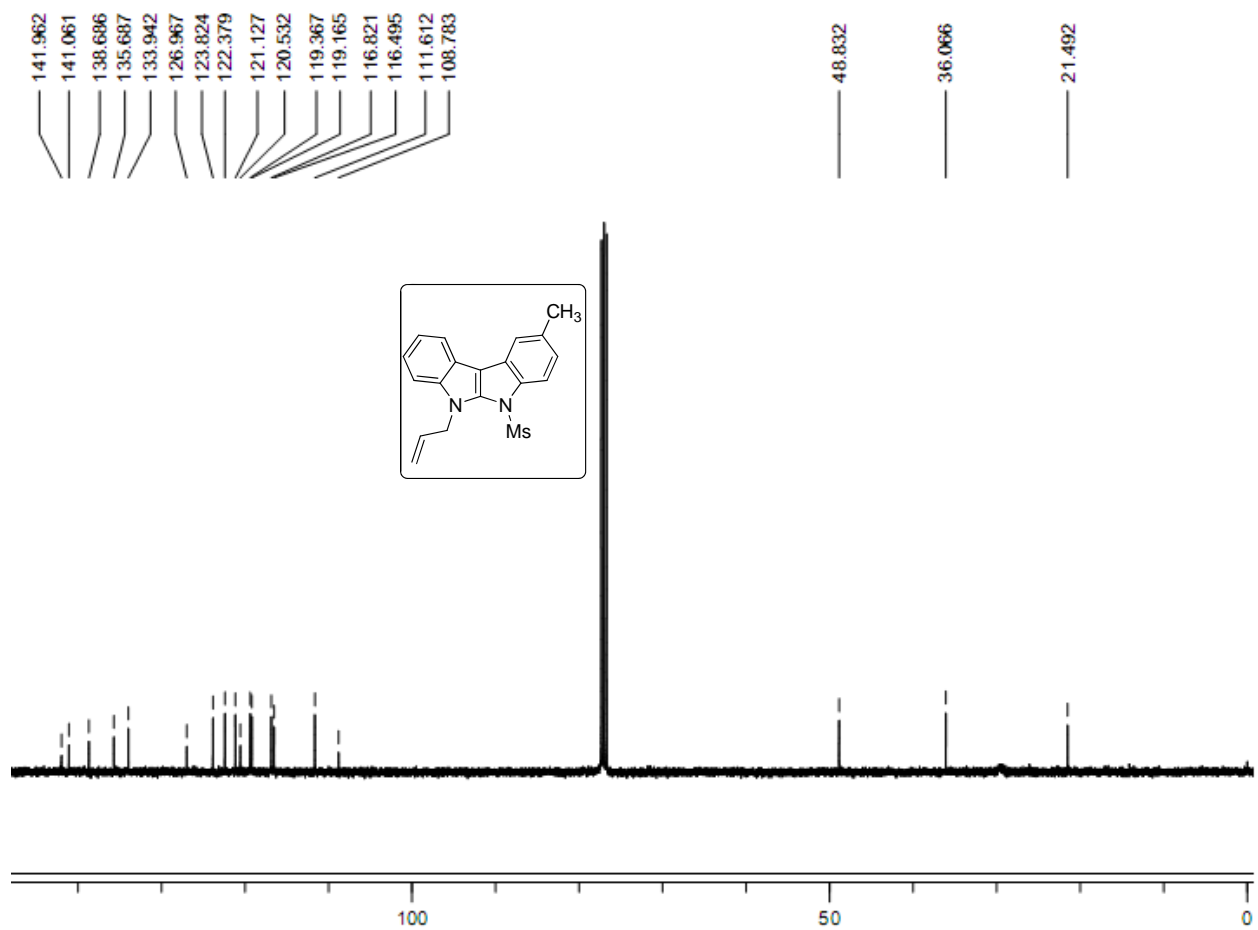

**4I** <sup>13</sup>C NMR (100 MHz, CDCl<sub>3</sub>)



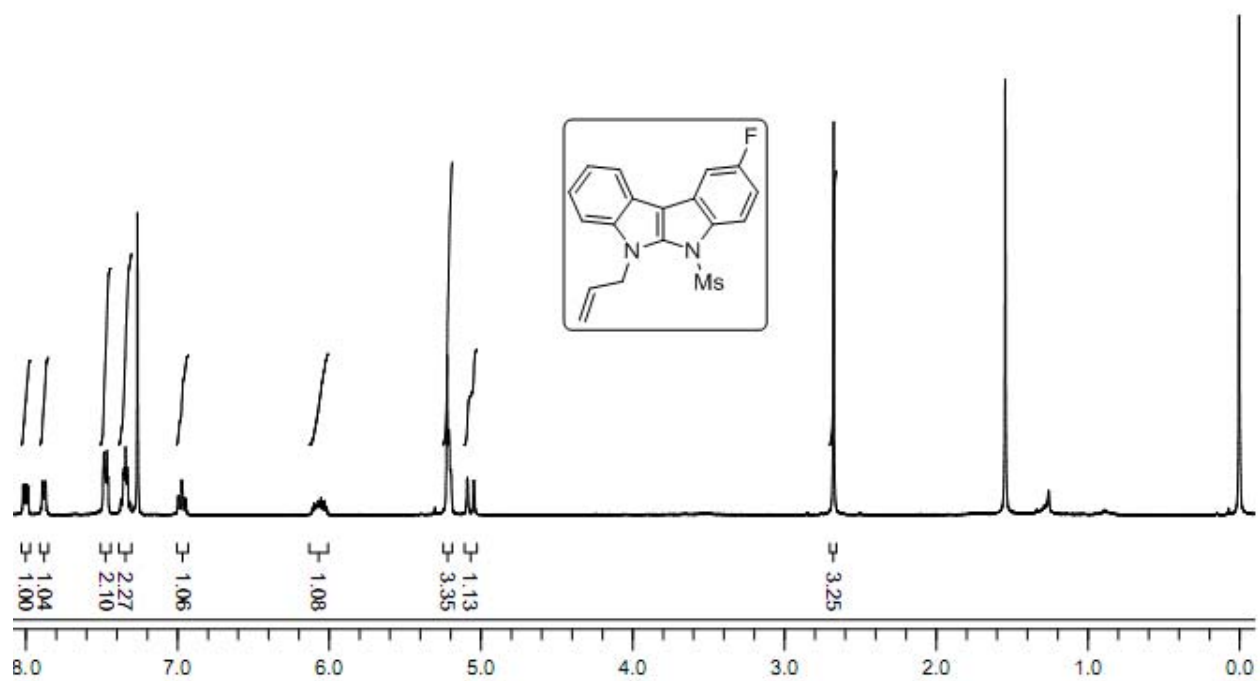

**4m**  $^1\text{H}$  NMR (400 MHz,  $\text{CDCl}_3$ )

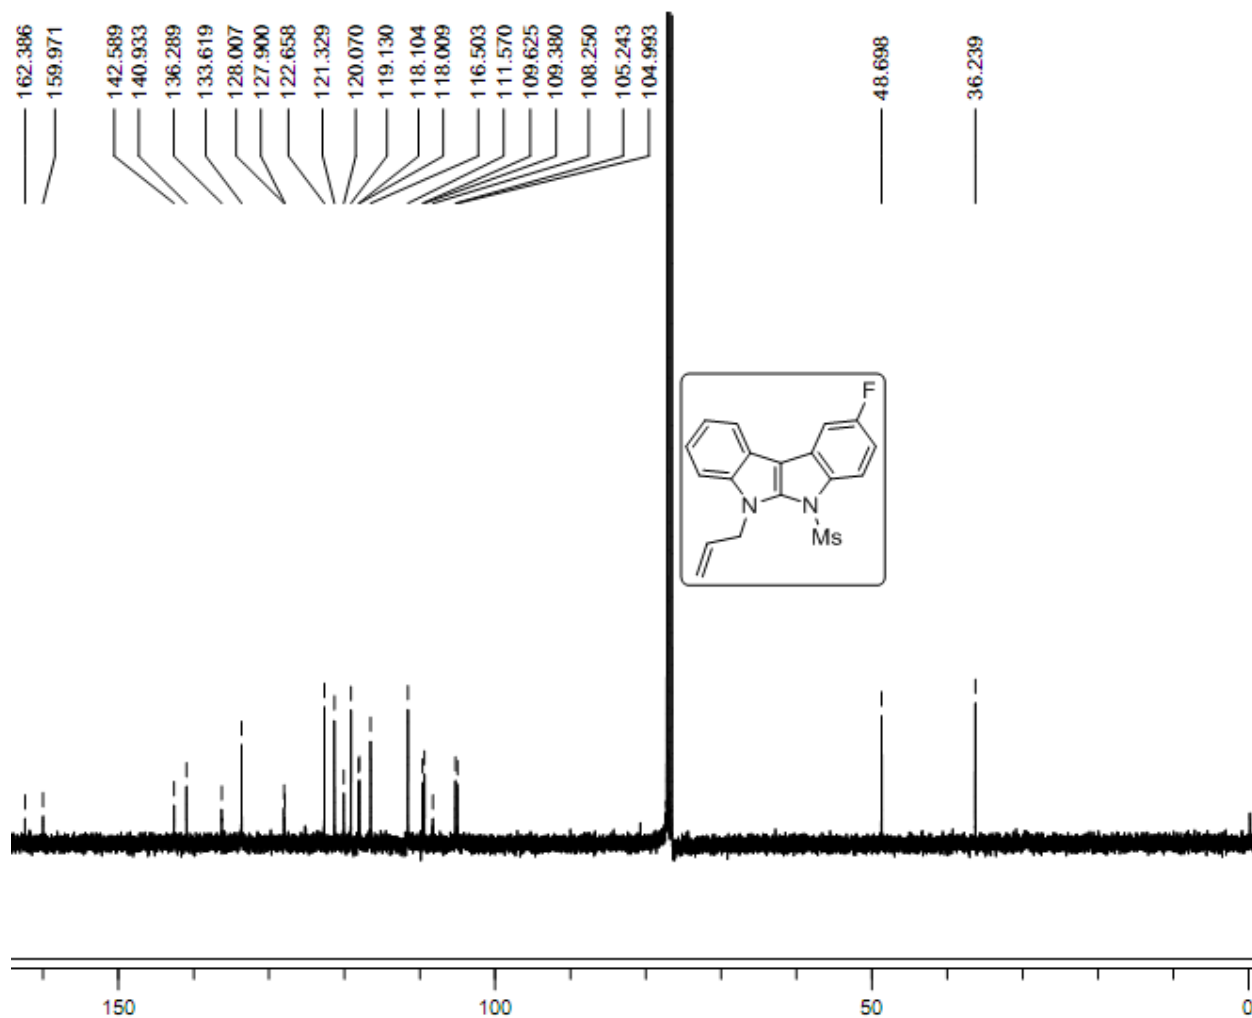

**4m**  $^{13}\text{C}$  NMR (100 MHz,  $\text{CDCl}_3$ )

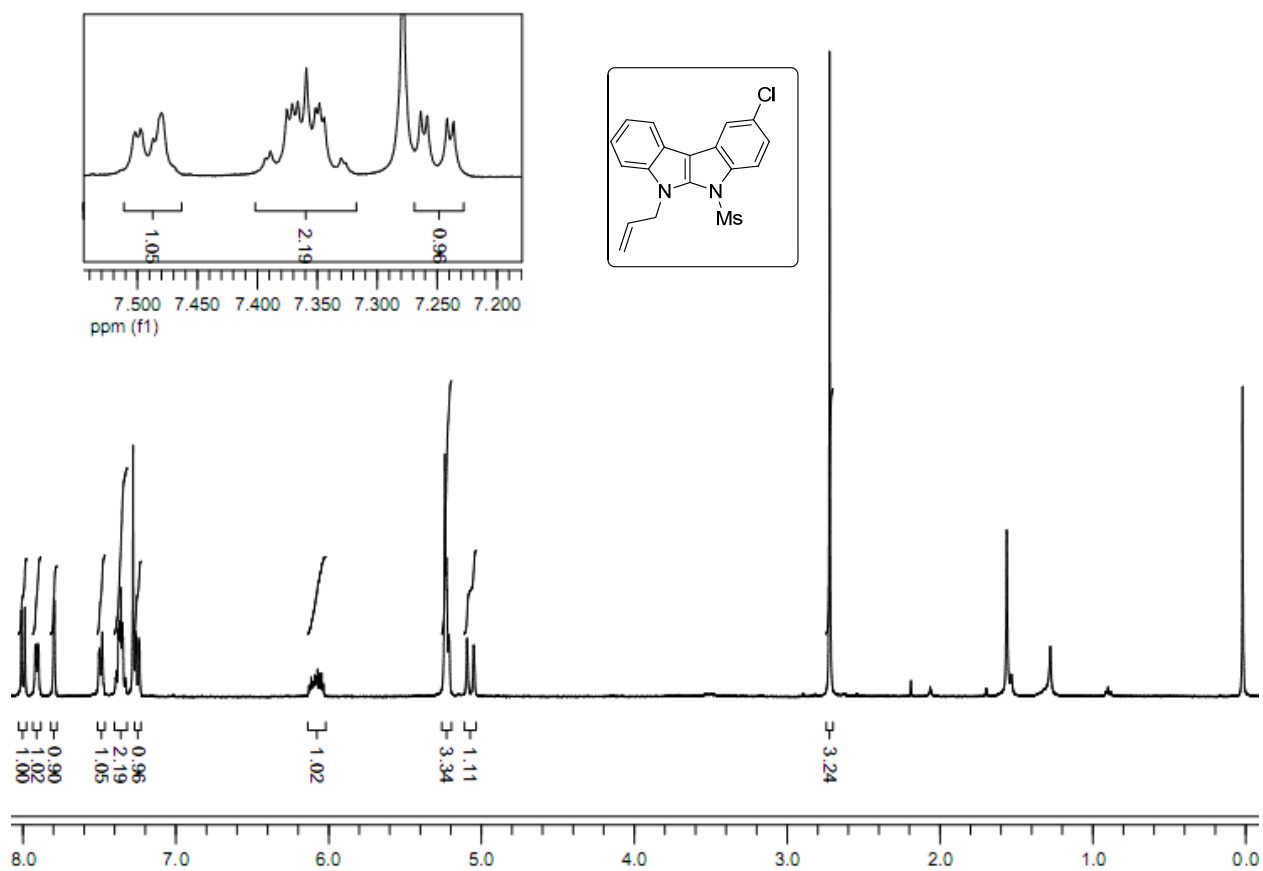

**4n**  $^1\text{H}$  NMR (400 MHz,  $\text{CDCl}_3$ )

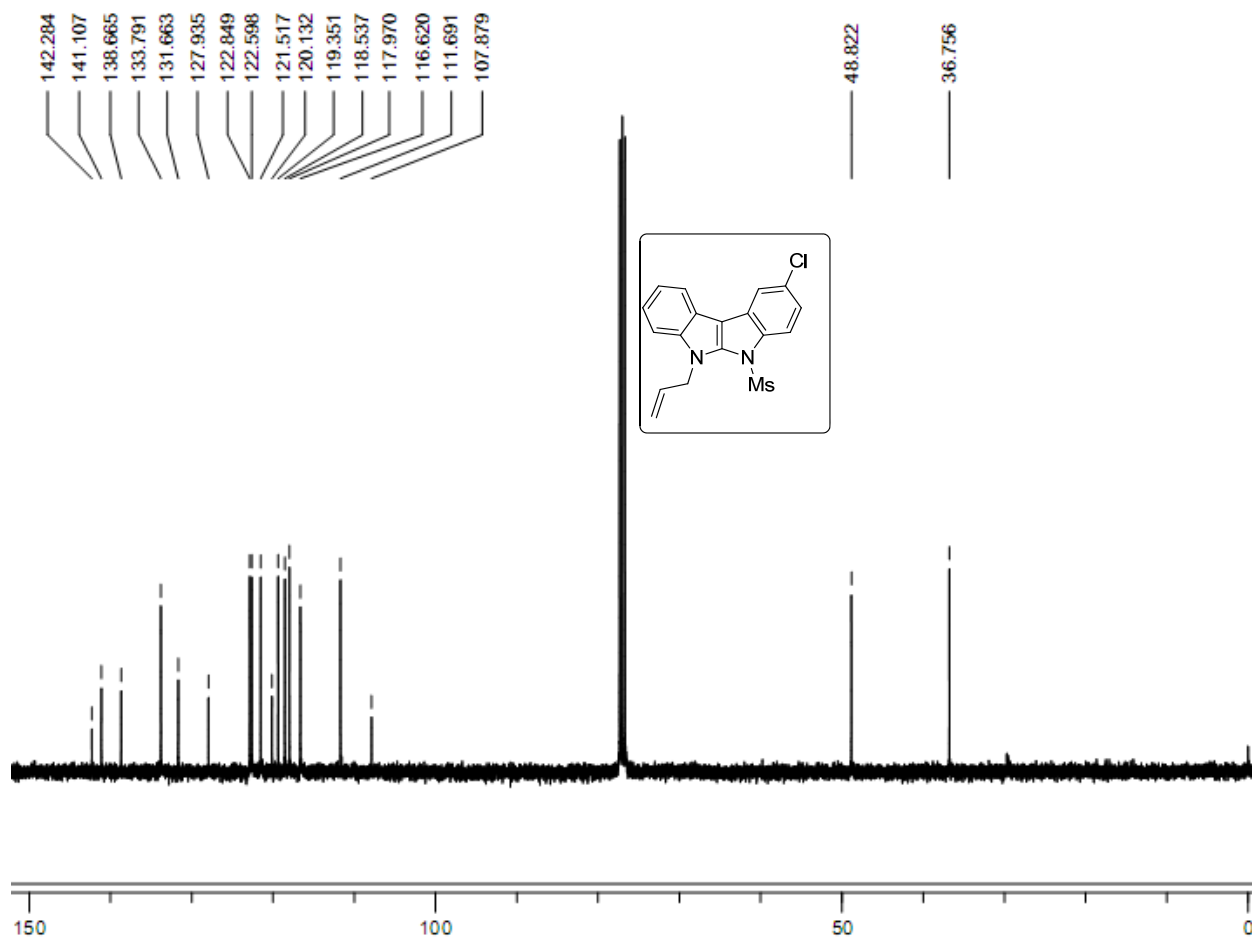

**4n**  $^{13}\text{C}$  NMR (100 MHz,  $\text{CDCl}_3$ )

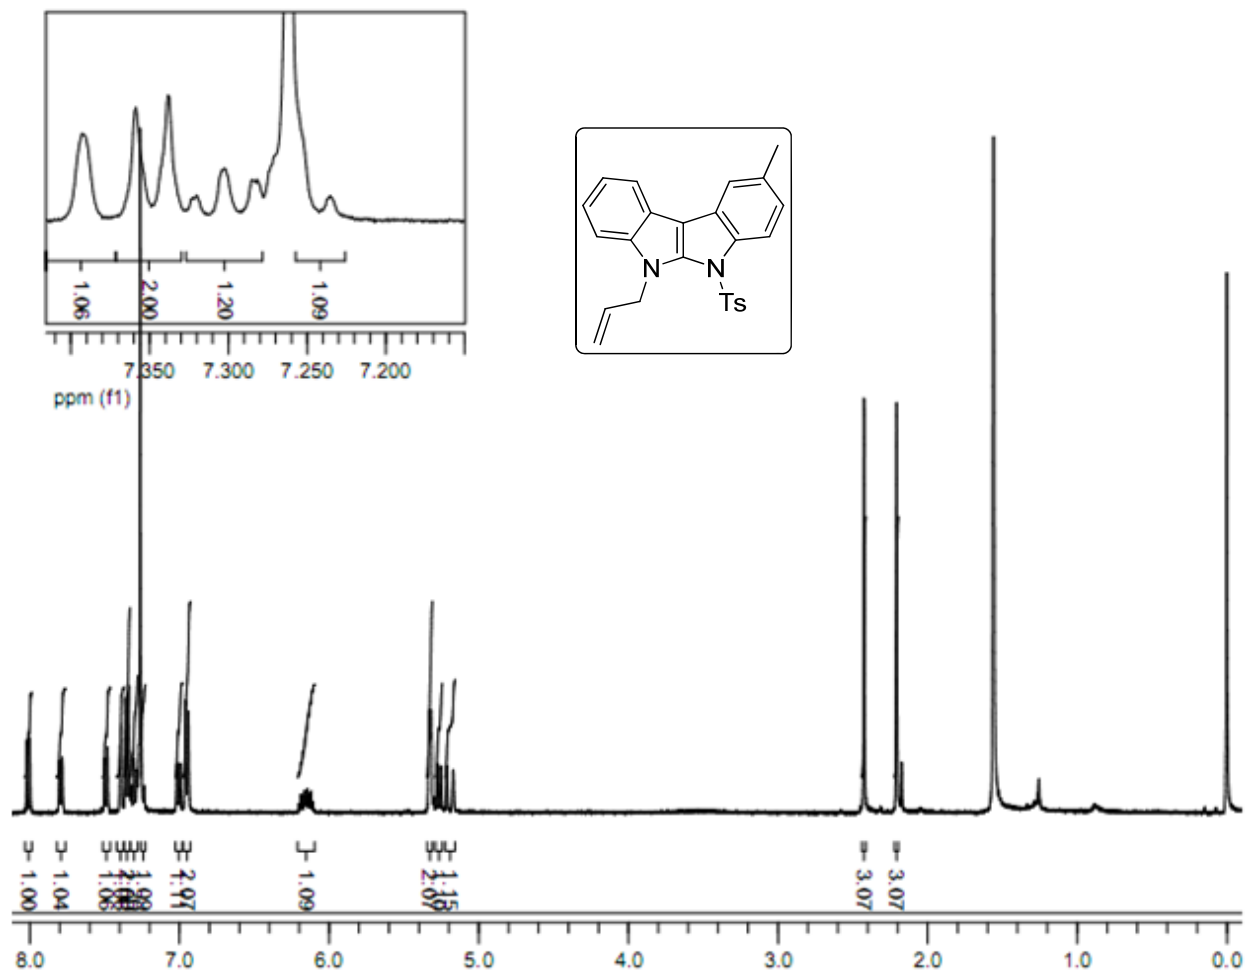

**4o**  $^1\text{H}$  NMR (400 MHz,  $\text{CDCl}_3$ )

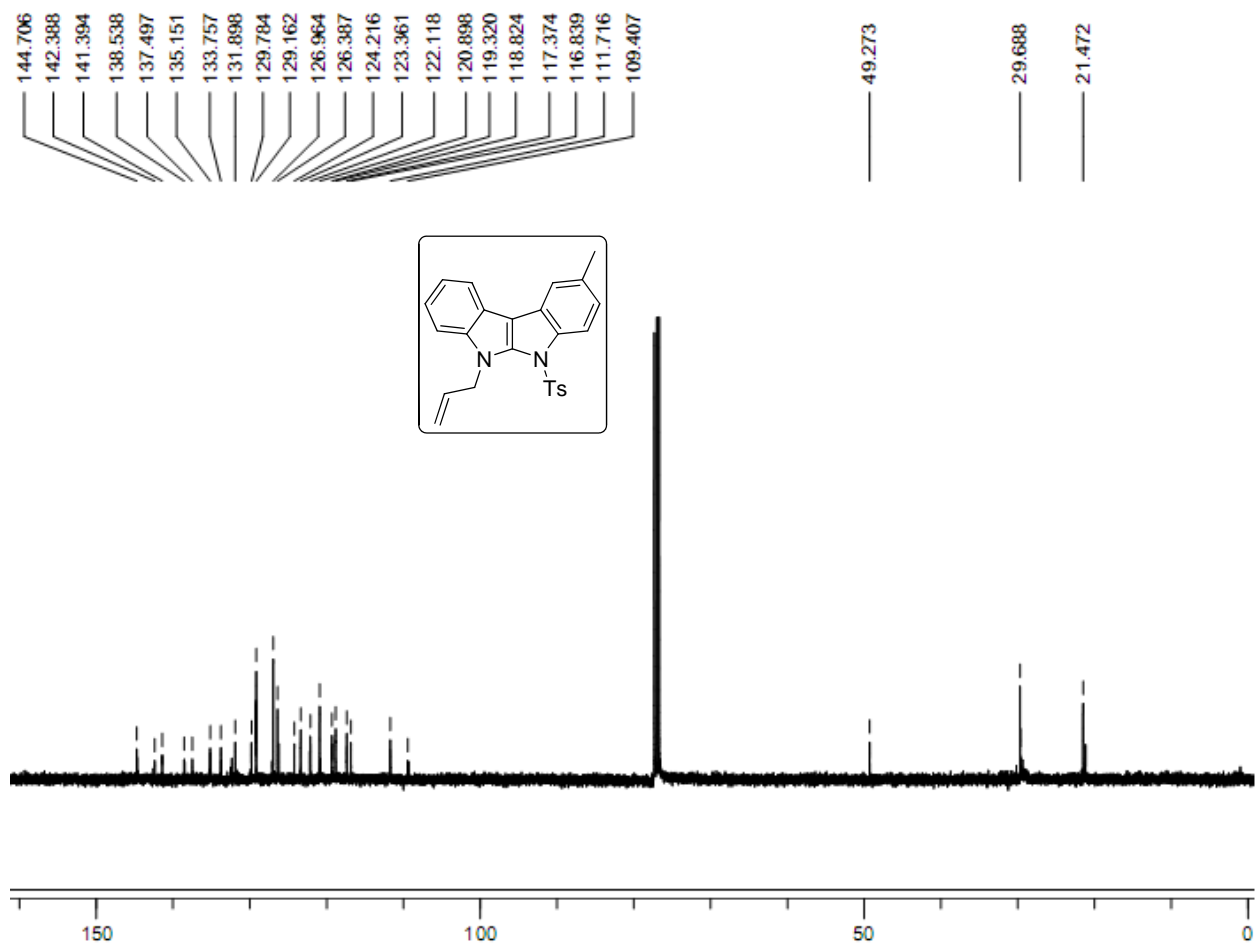

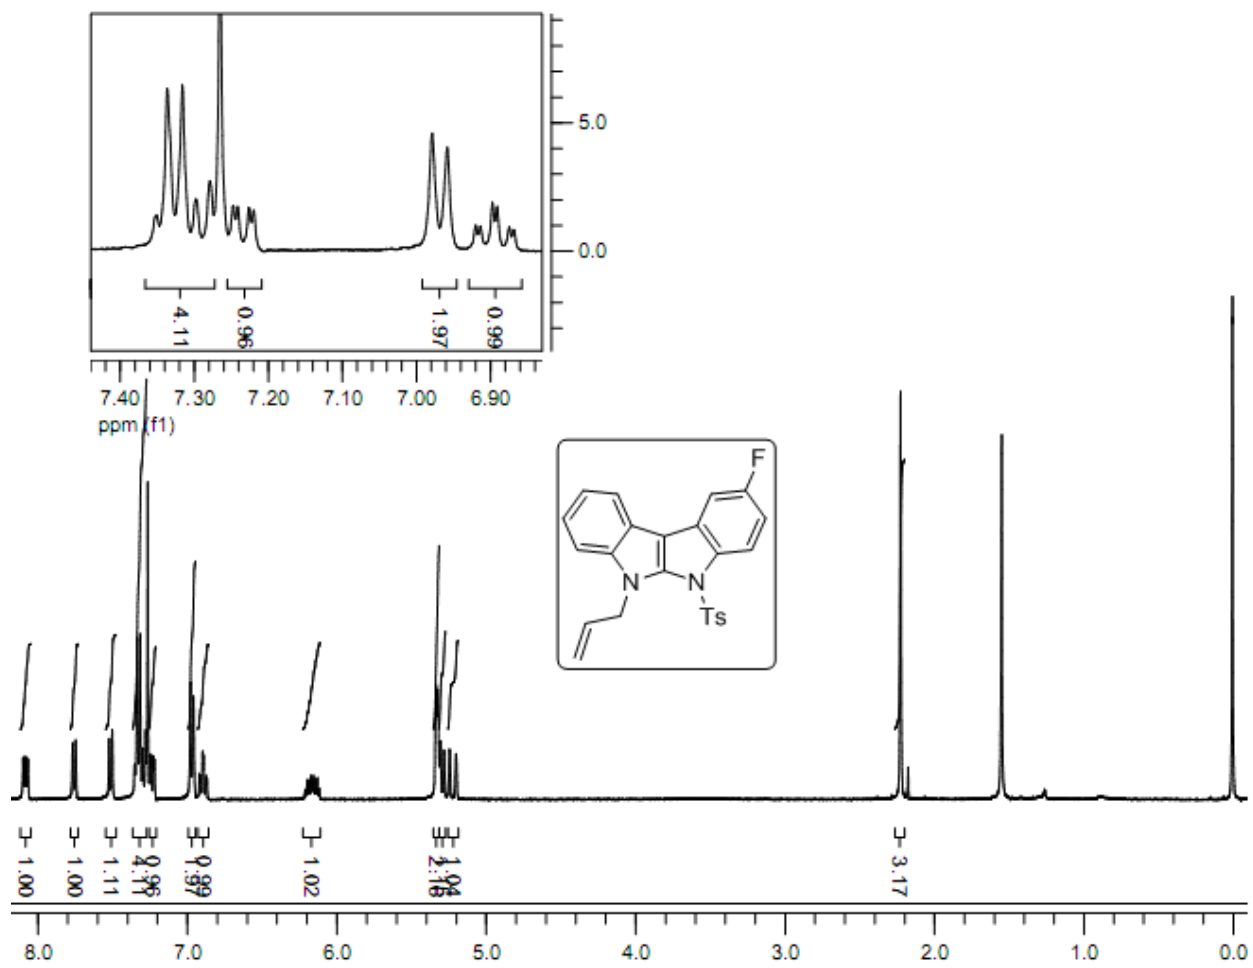

**4p**  $^1\text{H}$  NMR (400 MHz,  $\text{CDCl}_3$ )

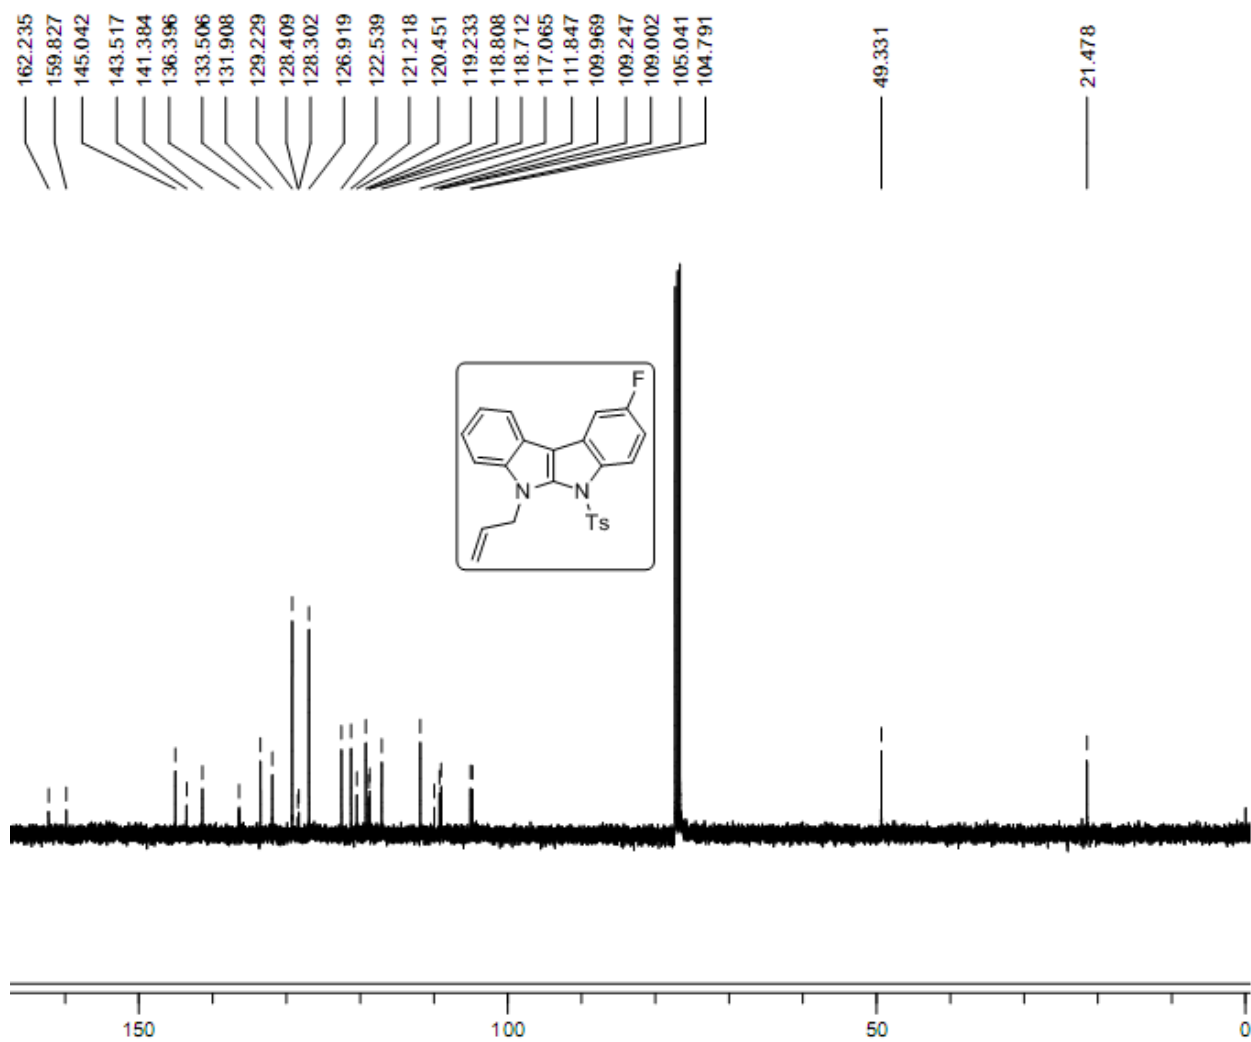

**4p**  $^{13}\text{C}$  NMR (100 MHz,  $\text{CDCl}_3$ )



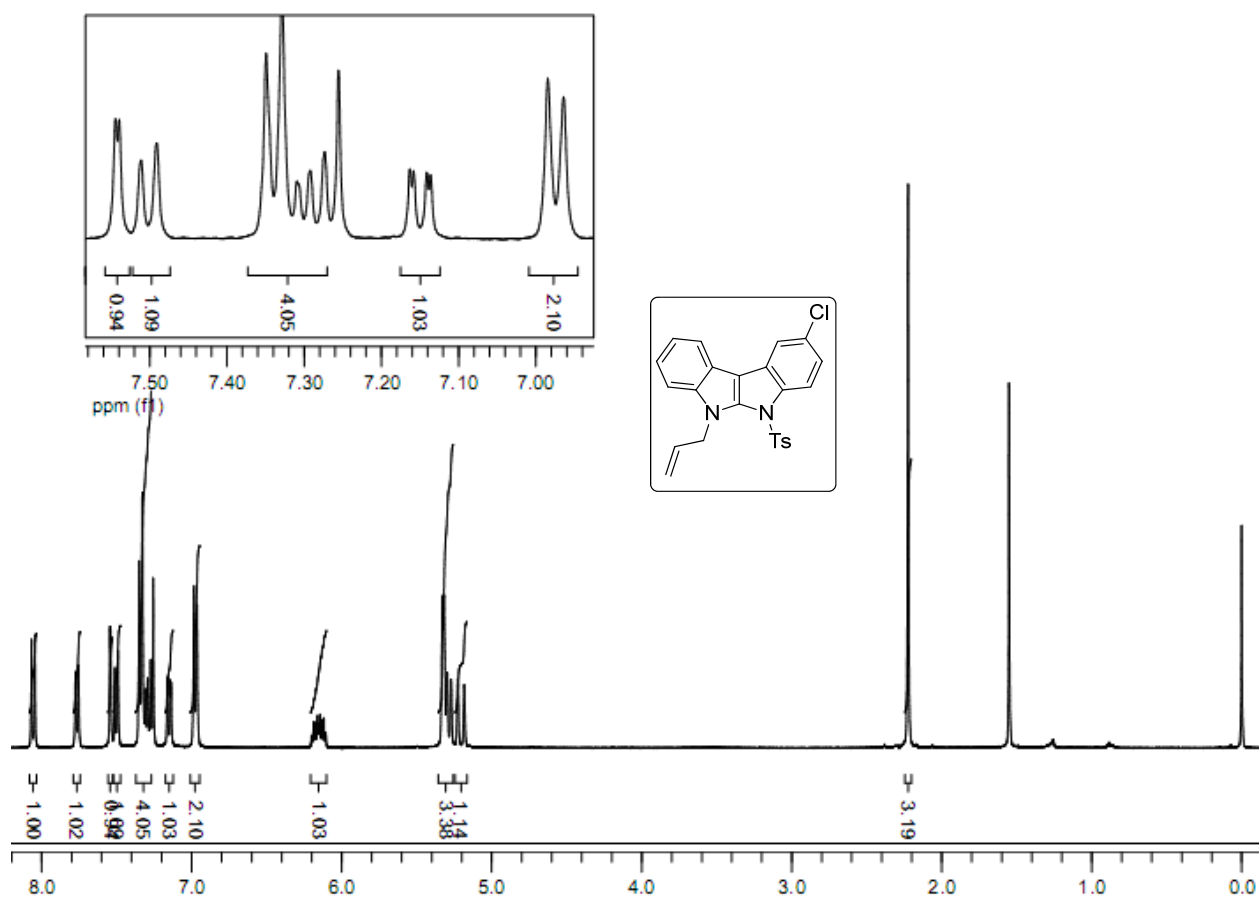

**4q**  $^1\text{H}$  NMR (400 MHz,  $\text{CDCl}_3$ )

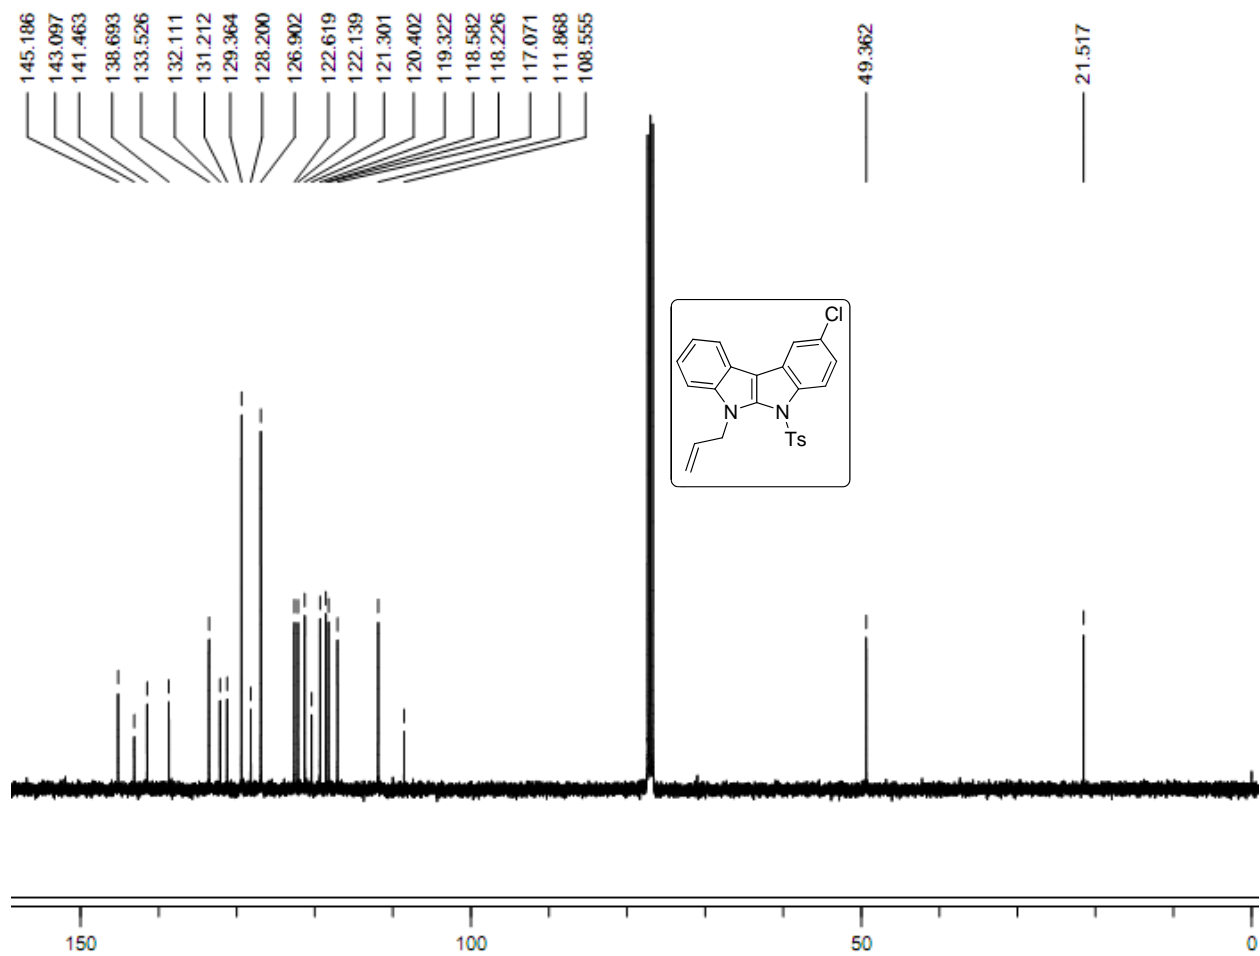

**4q**  $^{13}\text{C}$  NMR (100 MHz,  $\text{CDCl}_3$ )

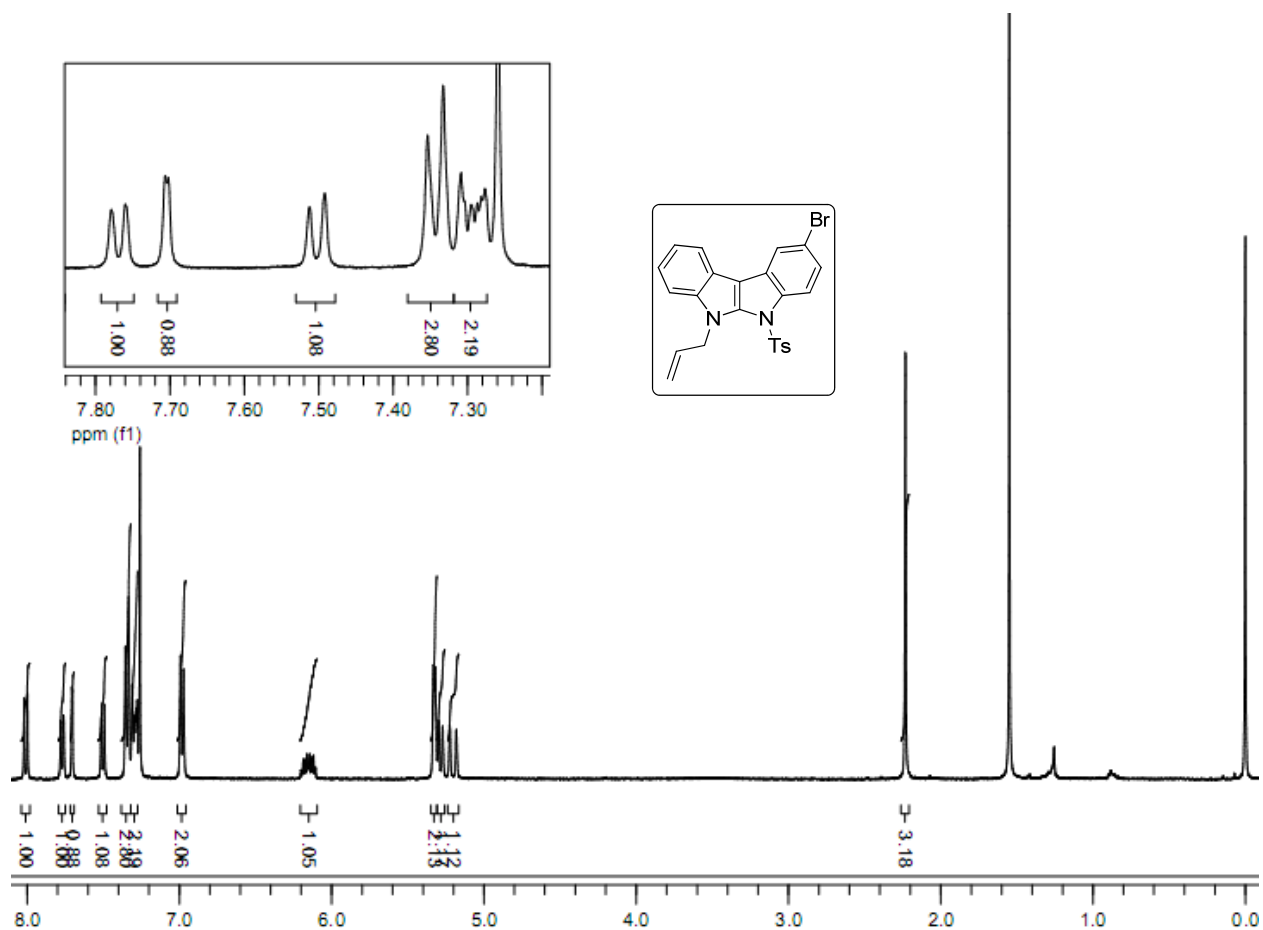

**4r**  $^1\text{H}$  NMR (400 MHz,  $\text{CDCl}_3$ )

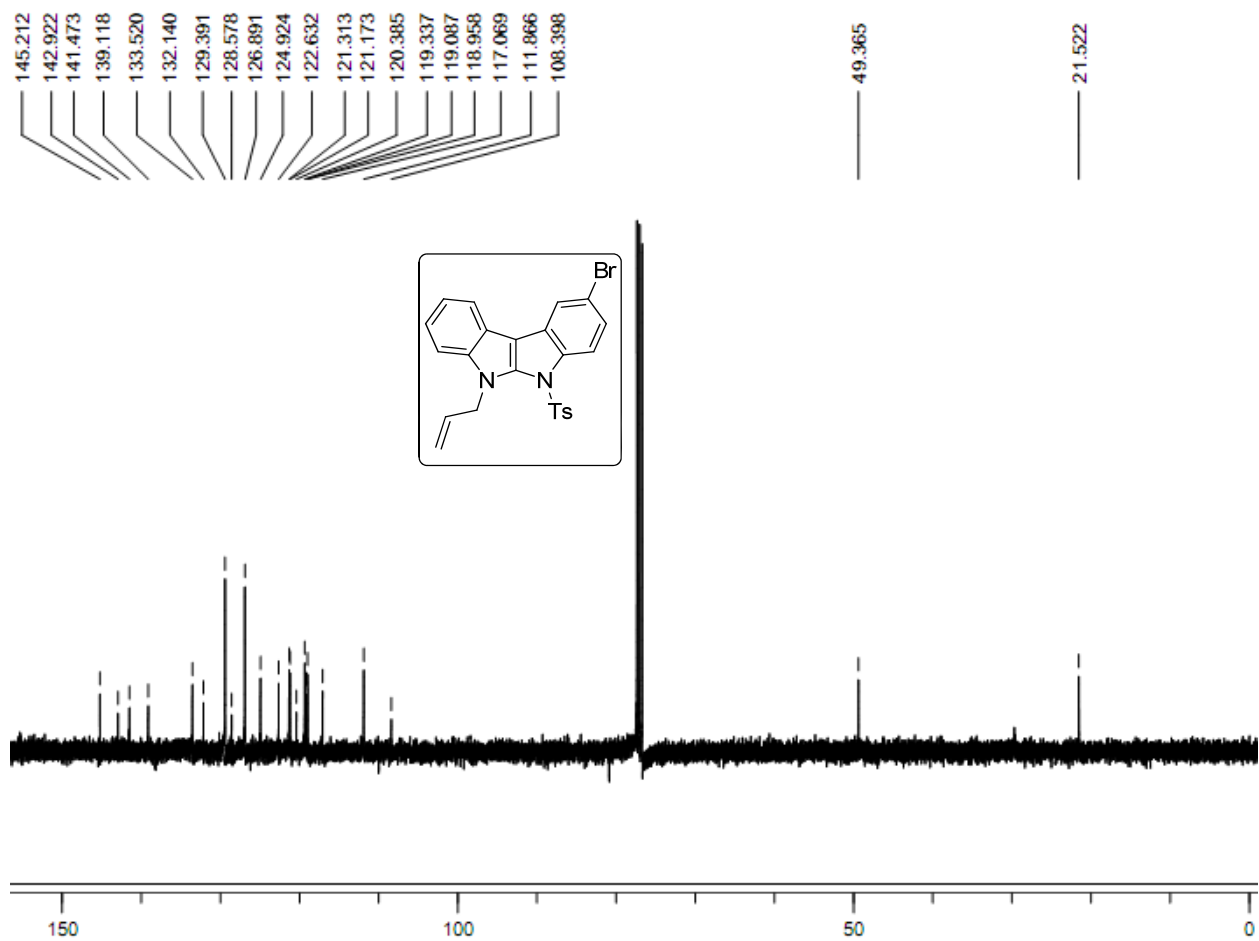

**4r**  $^{13}\text{C}$  NMR (100 MHz,  $\text{CDCl}_3$ )

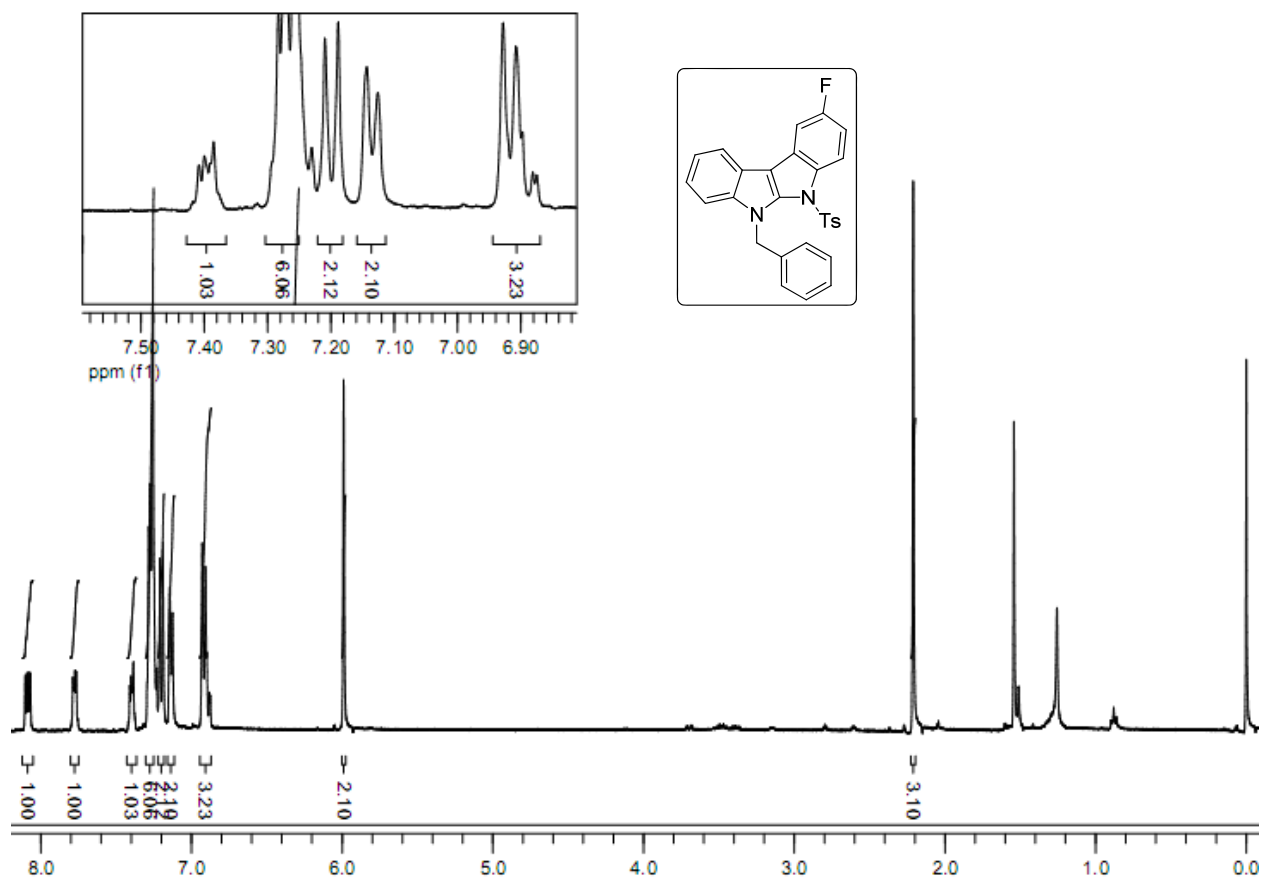

**4s**  $^1\text{H}$  NMR (400 MHz,  $\text{CDCl}_3$ )

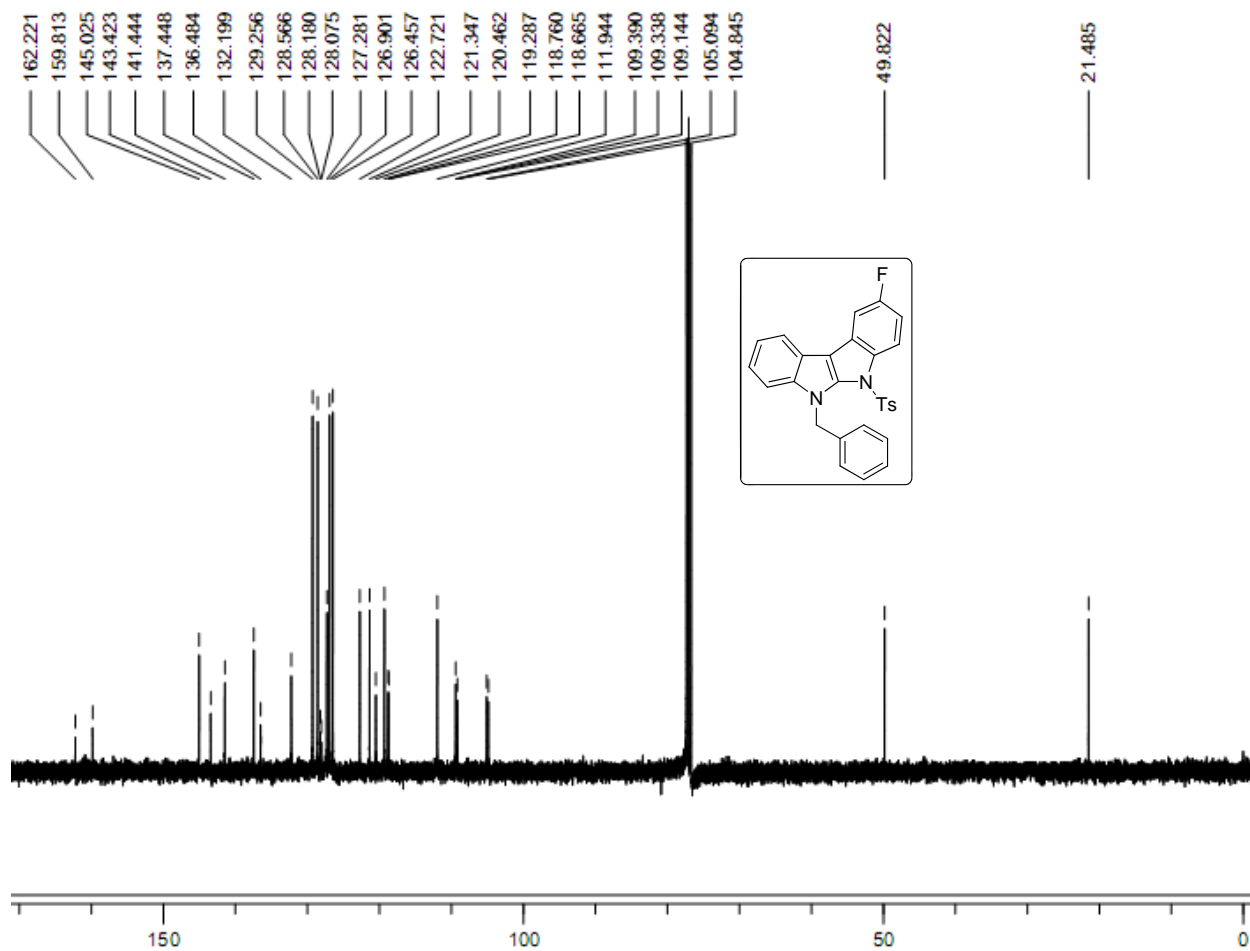

**4s**  $^{13}\text{C}$  NMR (100 MHz,  $\text{CDCl}_3$ )

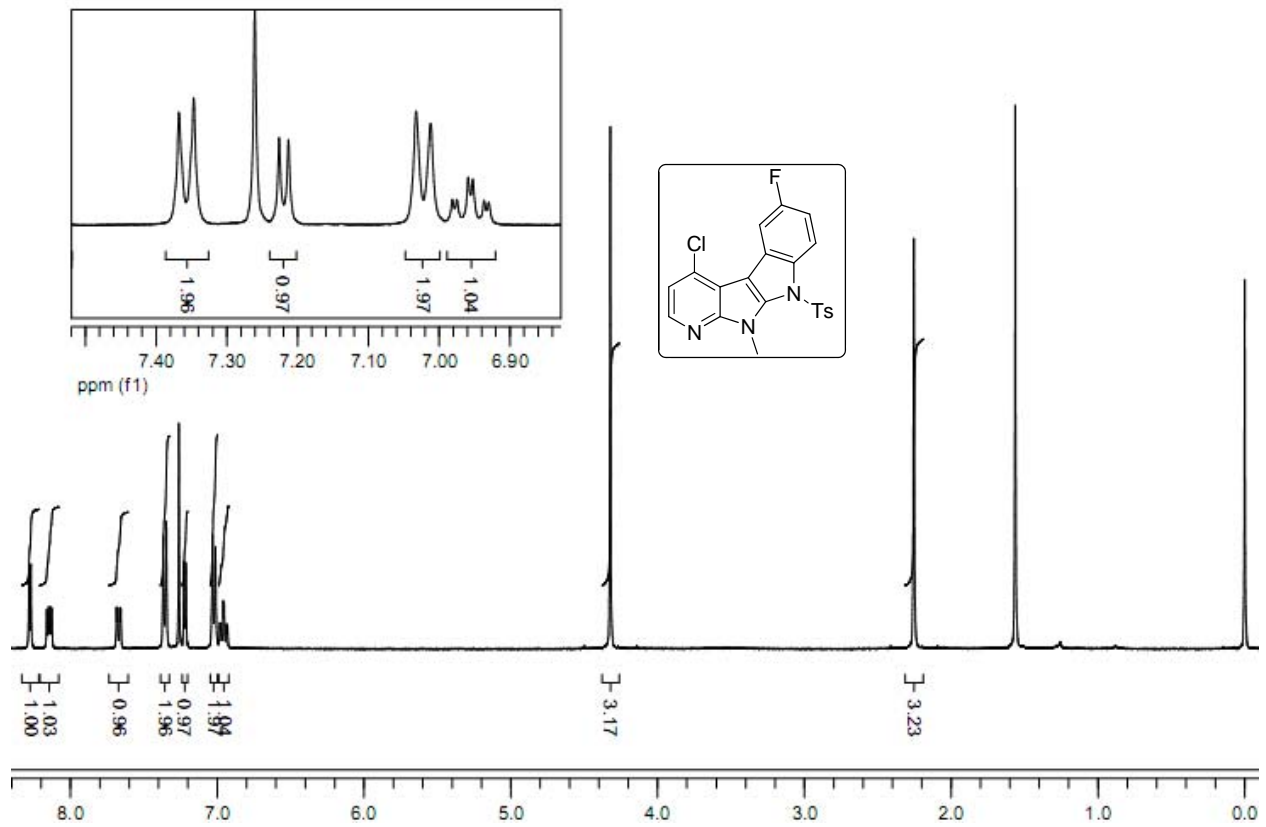

**4t**  $^1\text{H}$  NMR (400 MHz,  $\text{CDCl}_3$ )

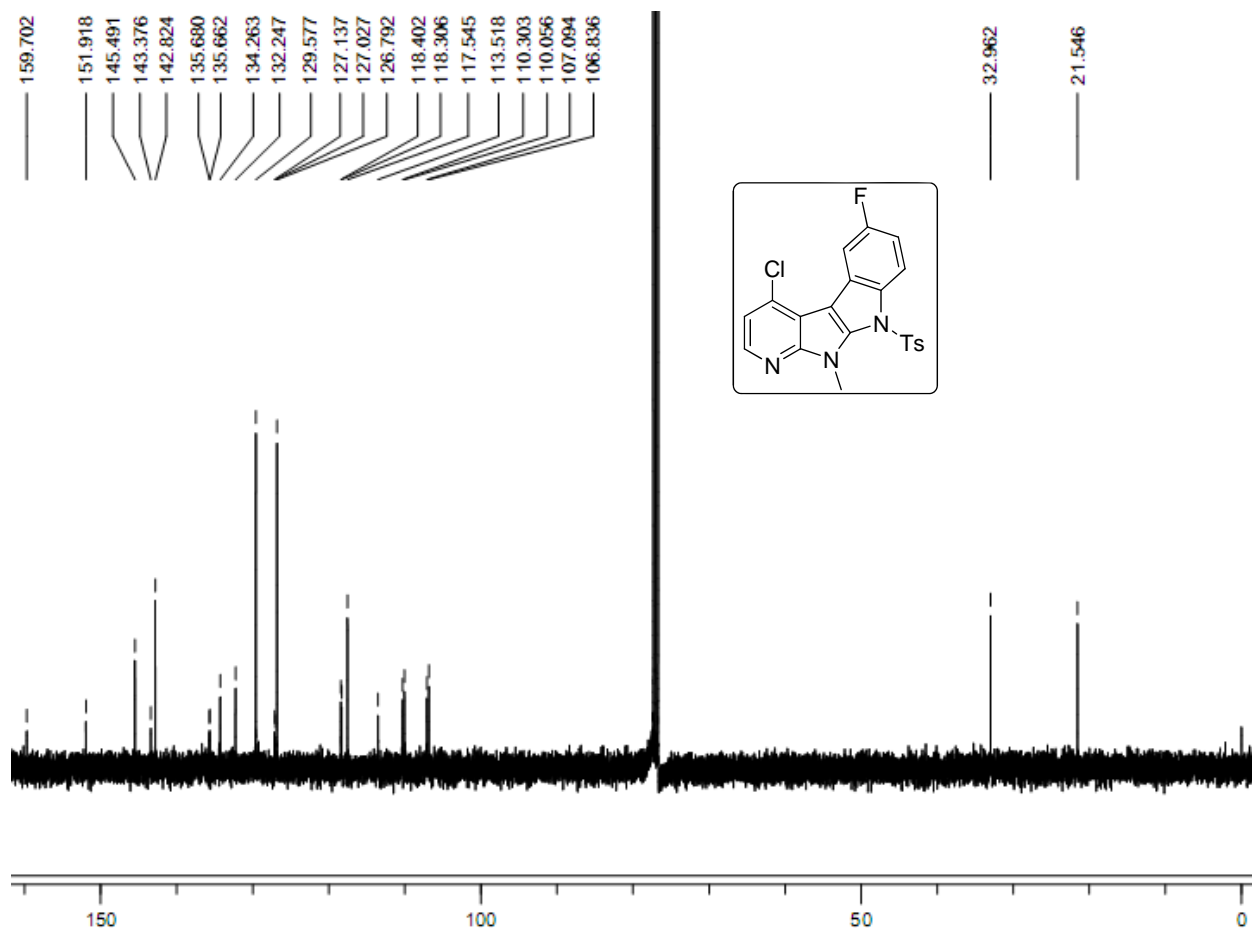

**4t**  $^{13}\text{C}$  NMR (100 MHz,  $\text{CDCl}_3$ )



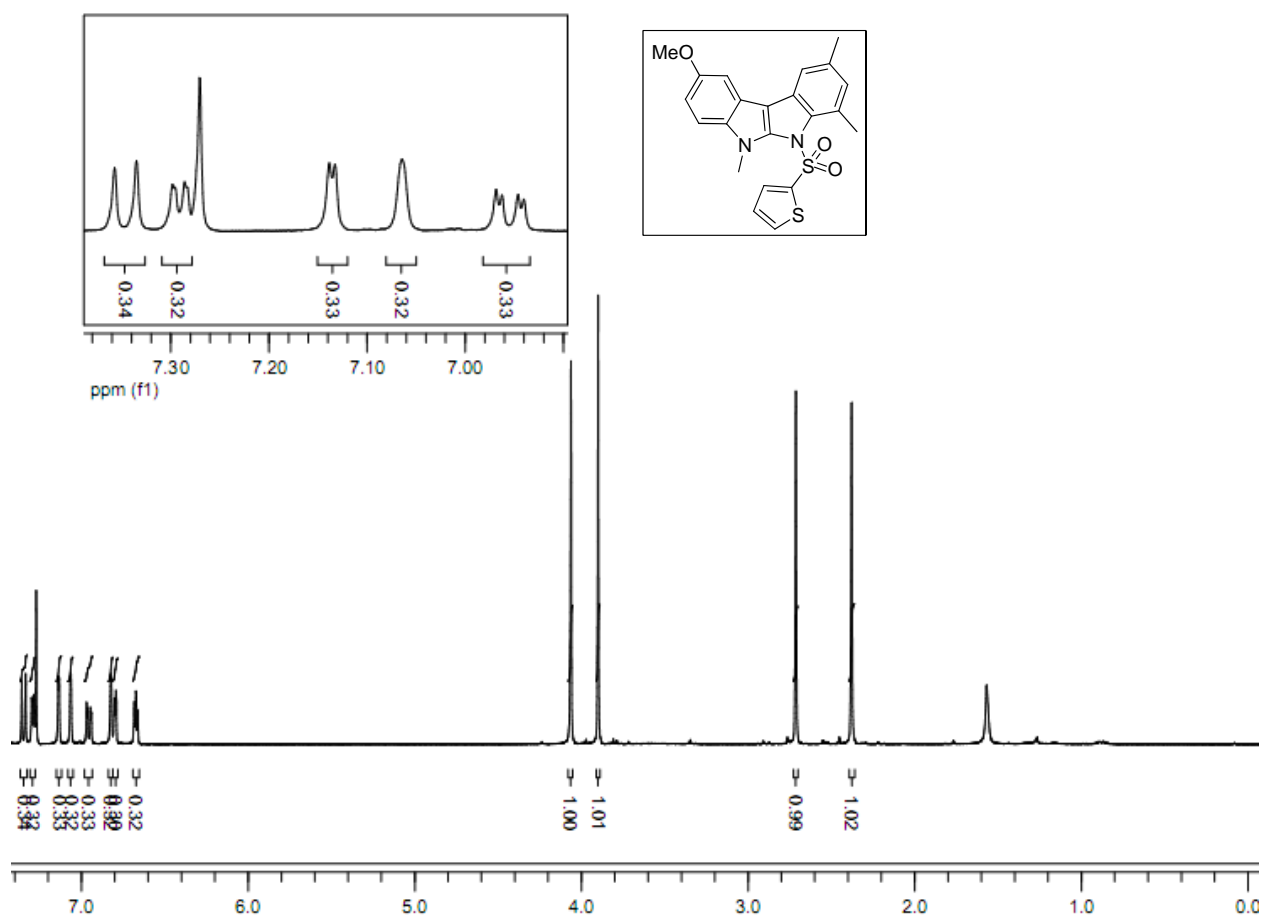

**4u**  $^1\text{H}$  NMR (400 MHz,  $\text{CDCl}_3$ )

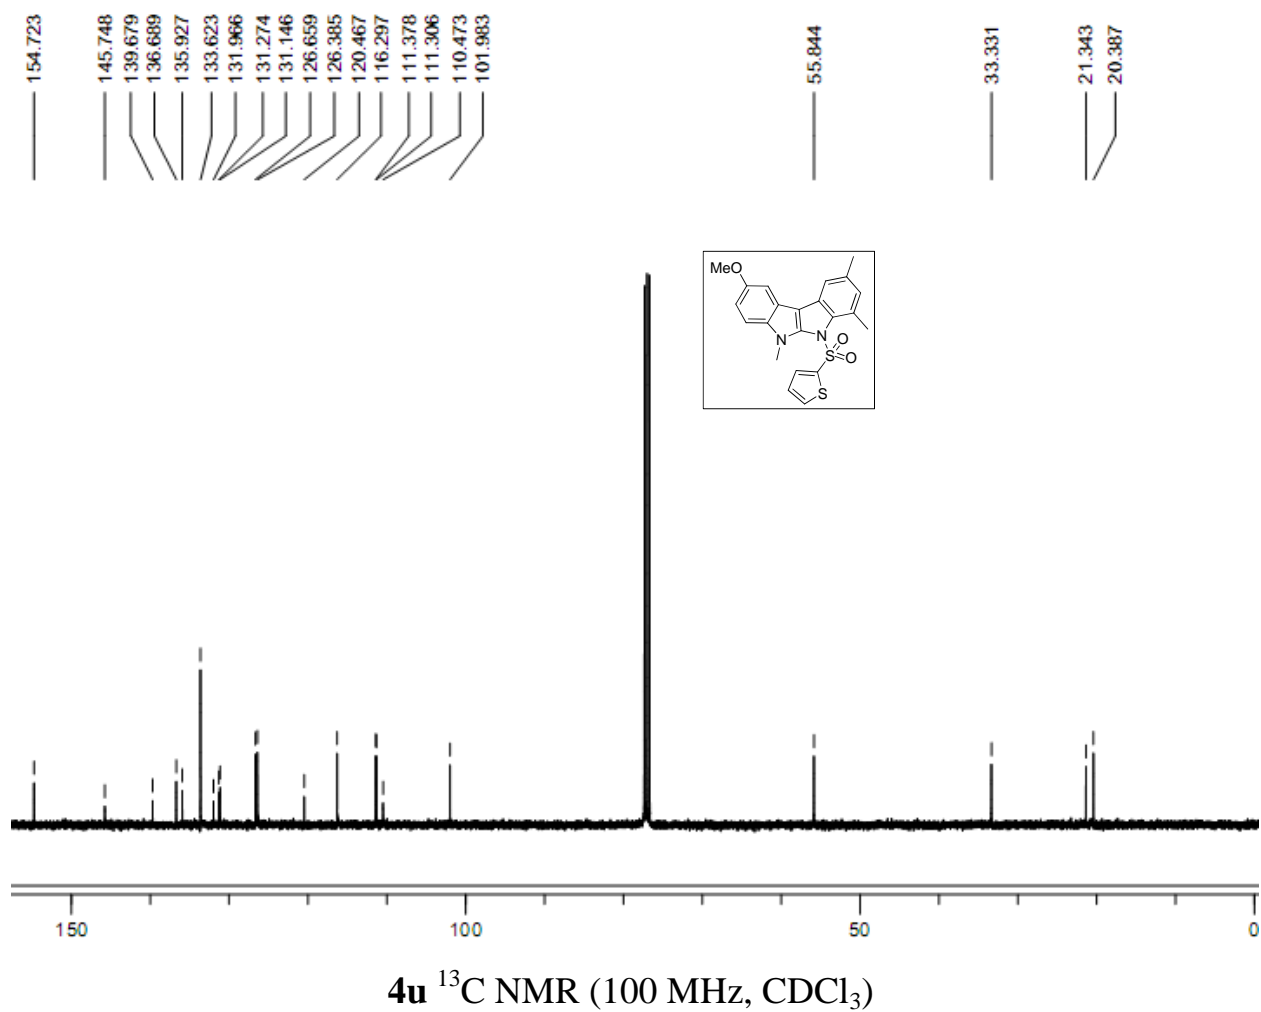

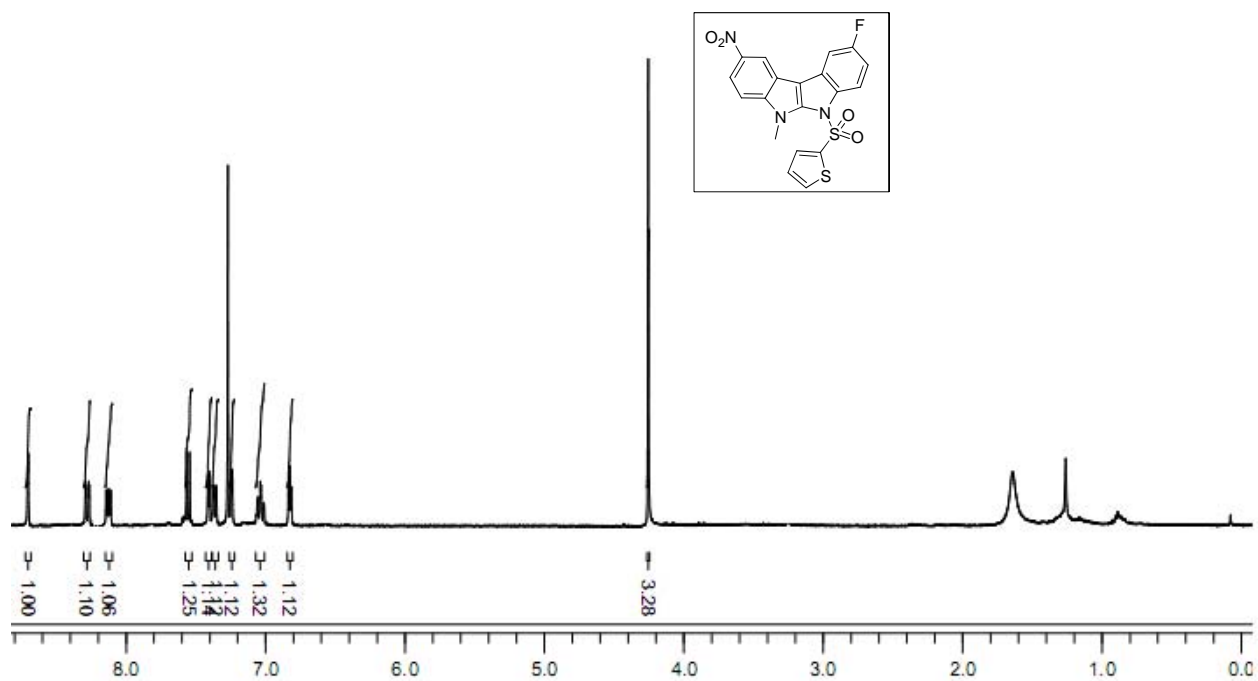

**4v**  $^1\text{H}$  NMR (400 MHz,  $\text{CDCl}_3$ )

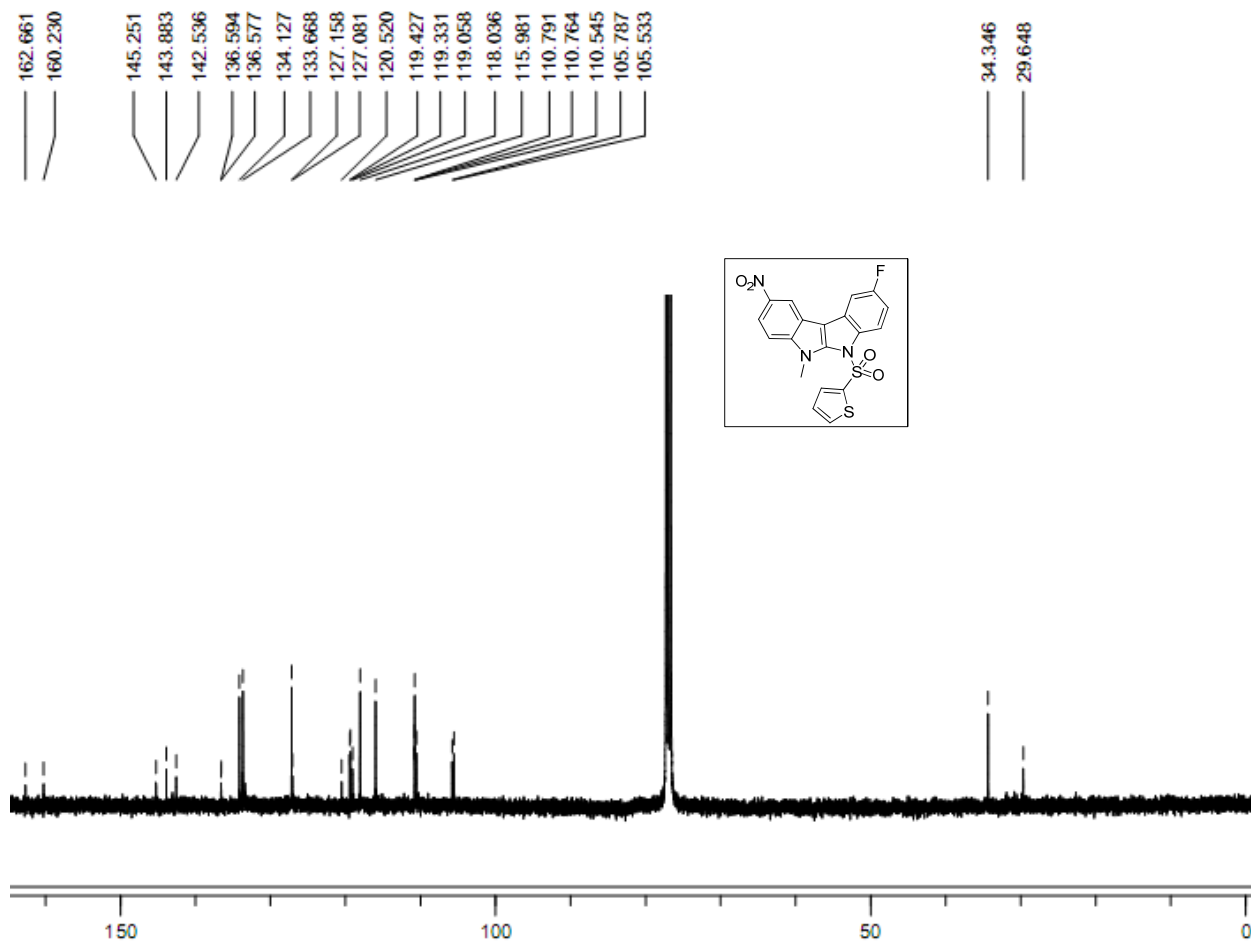

**4v**  $^{13}\text{C}$  NMR (100 MHz,  $\text{CDCl}_3$ )
